# Supplementary material for: Vinculin recruitment to α-catenin halts the differentiation and maturation of enterocyte progenitors to maintain homeostasis of the Drosophila intestine
Source: eLife. 2022 Oct 21;11:e72836. doi: 10.7554/eLife.72836 (PMC9586559; doi:10.7554/eLife.72836)
Supplement: Figure 1—source data 1. [file elife-72836-fig1-data1.xlsx]

## Sheet: Figure 1C
Figure 1C
	Gut length
	length of the midgut in µm
	Ctrl	mys #27735	talin #28950	vinc #25965
	1105.79	941.975	637.117	993.48
	1048.06	940.894	956.938	1108.67
	1023.99	809.522	570.171	1112.35
	1209.12	730.308	788.159	945.515
	1089.24	668.821	752.409	1015.04
	983.158	733.938	1055.24	916.422
	756.58	1035.44	598.074	1076.39
	1219.29	798.626	723.815	1083.32
	1089.13		617.609	1104.48
	1221.32		603.729	1100.51
	991.665			995.748
	1242.45			1155.27
	1123.39			932.102
	1110.92
	1053.13
	1194.5
	873.517
	1023.14
	1062.64

## Sheet: Figure 1E
Figure 1E
	Progenitor proportion
	ratio of GFP+ cells over number of DAPI nuclei
	Ctrl	mys #27735	talin #28950	vinc #25965	vinc #41959
	0.460699	0.172185	0.181818	0.70202	0.60034
	0.418667	0.0930233	0.158333	0.574074	0.574209
	0.389791	0.0480769	0.25	0.707792	0.608696
	0.371212	0.0219436	0.0439024	0.340541	0.433538
	0.4	0.0408163	0.0714286	0.655602	0.834879
	0.428954	0.0134228		0.626667	0.775148
	0.443769	0.0970149		0.488789
	0.410562	0.0165289		0.454277
	0.53112	0.172131		0.36715
	0.491018	0.0540541		0.435976
	0.433962	0.153846		0.664286
	0.424603	0.0865385		0.538462
	0.465969
	0.4
	0.379147
	0.388715
	0.425428
	0.406015
	0.369963
	0.416058
	0.4
	0.326271
	0.44843
	0.520492
	0.407563
	0.386635
	0.421739
	0.360656
	0.430079
	0.38961
	0.366995
	0.412141
	0.371622
	0.421725

## Sheet: Figure 1F
Figure 1F
	Cell density
	number of nuclei (DAPI+) / 10000 µm² area
	Ctrl	mys #27735	talin #28950	vinc #25965	vinc #41959
	45	55	72	53	32
	47	96	95	26	27
	61	48	74	22	34
	67	60	102	27	18
	63	106	126	55	13
	67	81	90	43	39
	63	69		54	47
	50	82		36	32
	45	62		42	38
	44	85		45
	73	60		37
	48	63		21
	52	64		42
	61	60		35
	37	67
	63	70
	41	71
	48	58
	74	69
	54	63
	73	82
	67	65
	74	70
	81	39
	61	63
	76	89
	39	86
	58
	60
	73
	54
	57
	47
	39
	41
	63
	40
	72
	52
	33
	52
	84
	65
	73
	81
	59
	43
	76
	73
	71
	59
	46
	58
	63
	61
	63
	52
	49
	87
	73
	76
	79
	78

## Sheet: Figure 1-Supplement 1
Figure 1- figure supplement 1G
	Proliferative index
	number of pH3+ cells per posterior midgut
	14 days
	Ctrl	vincRNAi #25965	vincRNAi #41959
	3	8	6
	0	18	11
	1	11	5
	0	3	0
	0	4	4
	0	9	5
	1	7	2
	0	8	6
		1	4
		0	17
		7	2
		16
		23
		2
		20
		7
		3
		8
		3
		9
		4
		8
