# Supplementary material for: Vinculin recruitment to α-catenin halts the differentiation and maturation of enterocyte progenitors to maintain homeostasis of the Drosophila intestine
Source: eLife. 2022 Oct 21;11:e72836. doi: 10.7554/eLife.72836 (PMC9586559; doi:10.7554/eLife.72836)
Supplement: Figure 2—source data 1. [file elife-72836-fig2-data1.xlsx]

## Sheet: Figure 2B
Figure 2B	Max. gut width and number of nuclei for each cross-section
	yw		vinc102.1
	Gut width (𝛍m)	Number of nuclei	Gut width (𝛍m)	Number of nuclei
	190.2	17	214.6	19
	195.1	11	217.1	24
	197.6	15	217.1	27
	200	17	204.9	19
	200	8	209.8	19
	200	14	202.4	17
	200	14	190.2	20
	200	10	182.9	21
	200	18	192.7	22
	197.6	13	187.8	16
	197.6	11	190.2	12
	202.4	16	253.7	35
	202.4	9	263.4	26
	204.9	10	265.9	28
	207.3	10	268.3	24
	209.8	11	268.3	31
	212.2	10	268.3	30
	212.2	13	268.3	35
	217.1	20	270.7	21
	217.1	14	268.3	34
	217.1	21	261	26
	214.6	13	256.1	26
	207.3	14	234.1	24
	209.8	12	231.7	27
	209.8	13	229.3	27
	214.6	12	226.8	27
	212.2	17	222	28
	212.2	13	219.5	30
	207.3	13	217.1	27
	219.5	12	209.8	21
	219.5	11	207.3	19
	217.1	11	202.4	23
	212.2	15	197.6	16
	204.9	11	185.4	25
	207.3	14	190.2	17
	209.8	14	190.2	22
	207.3	11	200	23
	204.9	13	207.3	25
	202.4	13	192.7	31
	197.6	16	195.1	25
	195.1	19	190.2	22
	195.1	16	187.8	19
	195.1	14	182.9	21
	190.2	10	175.6	20
			236.6	33
			239	33
			239	28
			236.6	22
			241.5	29
			243.9	30
			256.1	24
			258.5	33
			263.4	28
			263.4	21
			256.1	23
			253.7	42
			253.7	40
			251.2	49
			251.2	45
			248.9	46
			246.3	50
			246.3	34
			243.9	30
			236.6	23
			236.6	31
			226.8	26
			239	31
			236.6	33
			234.1	32
			236.6	23
			231.7	31
			229.3	20
			229.3	29
			231.7	27
			224.4	24
			217.1	23
			222	21

## Sheet: Figure 2D
Figure 2D	Mean GFP signal for 50𝛍m segments along the posterior-most 1200𝛍m of the midgut
	yw esgts F/O			vinc102.1 esgts F/O			vinc102.1 vincRFP esgts F/O
	Position (𝛍m) A->P	Mean GFP signal		Position (𝛍m) A->P	Mean GFP signal		Position (𝛍m) A->P	Mean GFP signal
	0-49	1.28279		0-49	1.26323		0-49	1.37326
	50-99	1.35194		50-99	1.20235		50-99	1.32962
	100-149	1.37779		100-149	1.14026		100-149	1.3177
	150-199	1.42742		150-199	1.18261		150-199	1.3298
	200-249	1.46542		200-249	1.24824		200-249	1.2975
	250-299	1.55865		250-299	1.27037		250-299	1.35679
	300-349	1.60129		300-349	1.34312		300-349	1.33945
	350-399	1.82025		350-399	1.41457		350-399	1.23632
	400-449	1.79036		400-449	1.53786		400-449	1.27934
	450-499	1.77009		450-499	1.57998		450-499	1.3508
	500-549	1.78969		500-549	1.70849		500-549	1.39094
	550-599	1.76483		550-599	1.85716		550-599	1.49322
	600-649	1.76376		600-649	2.10943		600-649	1.5843
	650-699	1.8628		650-699	2.49087		650-699	1.64081
	700-749	1.85614		700-749	2.82649		700-749	1.79931
	750-799	1.83344		750-799	2.8807		750-799	1.77592
	800-849	1.85326		800-849	2.68834		800-849	1.66397
	850-899	1.78438		850-899	2.34656		850-899	1.64192
	900-949	1.74669		900-949	2.14951		900-949	1.66468
	950-999	1.71529		950-999	1.85426		950-999	1.70526
	1000-1049	1.60222		1000-1049	1.79379		1000-1049	1.74909
	1050-1099	1.46525		1050-1099	1.98576		1050-1099	1.82352
	1100-1140	1.43735		1100-1140	2.2548		1100-1140	1.84745
	1150-1200	1.51506		1150-1200	2.13004		1150-1200	1.60222

## Sheet: Figure 2F
Figure 2F
	Gut width
	Gut width (𝛍m) at R4/5
	yw esgts F/O	vinc102.1 esgts F/O	vinc102.1 vincRFP esgts F/O
	175.655	168.154	148.236
	151.238	177.802	169.901
	133.818	179.409	155.738
	147.205	176.934	160.761
	151.864	180.264	177.23
	157.406	176.953	161.129
	178.38	174.268	202.374
	125.456	168.396	173.593
	131.151	168.616	158.089
	149.699	167.604	110.516
	147.097	216.863	151.582
	133.77	169.681	143.045
	160.286	179.164	167.571
	187.63	151.064	153.522
	174.723	138.224	147.841
	170.216	161.552	178.261
	130.085	149.03	154.213
	166.158	136.537	157.909
	136.214	151.299	140.374
	167.831	154.867	153.545
	134.187	166.275	146.977
	142.259	198.135	144.963
	135.831	151.619	145.599
	135.275	160.044	159.409
	138.506	146.322	145.525
	116.688	172.313	158.456
	132.698	164.215	143.629
	158.982		138.731
	135.354		167.931
	143.485		158.253
	126.066		169.776
	149.984		137.809
	190.365		148.379
	131.936		146.954

## Sheet: Figure 2G
Figure 2G
	Cell density
	yw esgts F/O	vinc102.1 esgts F/O	vinc102.1 vincRFP esgts F/O
	59	98	77
	84	94	90
	62	119	66
	83	66	82
	43	106	82
	45	93	102
	79	115	72
	90	104	61
	90	135	57
	86	137

## Sheet: Figure 2- Supplement 1
Figure 2- figure supplement 1A'
	Wing area (arbitrary units)
	yw	vinc102.1
	42.27	41.87
	44.28	42.61
	44.79	42.96
	43.96	42.8
	42.88	43.07
	41.86	42.01
	41.51	43.5
	43.94	42.08
	42.22	43.14
	41.92	42.05
	41.57	41.6
	40.94	41.95
	42.07	42.65
	42.53	42.94
	39.53	42
	42.32	43.71
	44.56	42.69
	42.77	42.58
	40.78	41.67
	45.78	45.05
	39.78	42.32
	42.36	40.62
	42.49	40.05
	44.17	41.91
	44.66	39.99
	45.61	43.09
	43.62	42.14
	43.46	40.43
	41.99	44.09
	40.69	42.41
		42.5
		40.13
		40.37
		43.74
		43.15
		39.61
		42.57
		41.81
