# Supplementary material for: Vinculin recruitment to α-catenin halts the differentiation and maturation of enterocyte progenitors to maintain homeostasis of the Drosophila intestine
Source: eLife. 2022 Oct 21;11:e72836. doi: 10.7554/eLife.72836 (PMC9586559; doi:10.7554/eLife.72836)
Supplement: Figure 3—source data 1. [file elife-72836-fig3-data1.xlsx]

## Sheet: Figure 3B
Figure 3B
	ISC proportion
	ratio of YFP+ cells over number of DAPI nuclei
	14 days				28 days
	Ctrl	mys #27735	talin #28950	vinc #25965	Ctrl	vinc #25965
	0.252976	0.0464396	0.233696	0.266904	0.335802	0.304207
	0.286837	0.0983607	0.0469799	0.261603	0.329073	0.341912
	0.322751	0.186312	0.26749	0.195219	0.321348	0.410501
	0.196203	0.0760563	0.179577	0.250951	0.312139	0.298193
	0.25788	0.110169	0.20098	0.262799	0.30791	0.421171
	0.2625	0.0820896	0.241667	0.289634	0.374656
	0.241463	0.042654	0.166667	0.240924	0.292411
	0.304556	0.0597484	0.146018	0.256506	0.339806
	0.252372	0.11976	0.0755814	0.285714	0.358736
	0.288416		0.0492611	0.228216	0.273224
	0.274854		0.270408	0.240283	0.33414
	0.347188			0.266055	0.435746
	0.234756			0.316742

## Sheet: Figure 3C
Figure 3C
	Cell density
	number of nuclei (DAPI+) / 10000 µm² area
	14 days				28 days
	Ctrl	mys #27735	talin #28950	vinc #25965	Ctrl	vinc #25965
	42	33	31	48	69	98
	76	52	29	20	108	65
	63	55	34	22	116	69
	52	48	48	37	107	88
	72	51	30	61	124	94
	69	70	34	62	90
	69	68	60	33	135
	96	66	26	36	88
	85	29	50	56	93
	51	57	54	23	103
	83	54	44		94
	52	58			150
		67
