# Supplementary material for: Vinculin recruitment to α-catenin halts the differentiation and maturation of enterocyte progenitors to maintain homeostasis of the Drosophila intestine
Source: eLife. 2022 Oct 21;11:e72836. doi: 10.7554/eLife.72836 (PMC9586559; doi:10.7554/eLife.72836)
Supplement: Figure 4—source data 1. [file elife-72836-fig4-data1.xlsx]

## Sheet: Figure 4B
Figure 4B
	EB ratio
	NRE-lacZ+ cells over total DAPI nuclei
	14 days
	yw	vinc102.1
	16.9972	23.4797
	17.8899	22.87
	11.0787	27.3224
	18.7692	32.0721
	13.253	28.4595

## Sheet: Figure 4C
Figure 4C
	EB ratio
	proportion of Dl+ and NRE-lacZ+ cells
	14 days
	yw		vinc102.1
	ISC	EB	ISC	EB
	33.871	66.129	25	75
	43.6975	56.3025	25.9414	74.0586
	52.2727	47.7273	27.3256	72.6744
	48.9655	51.0345	28.0749	71.9251
	47.8261	52.1739	16.087	83.913
Mean =	45.3266	54.6734	24.4858	75.5142

## Sheet: Figure 4D
Figure 4D
	Nuclear size
	DAPI nuclei area sorted for each indicated cell type markers
	14 days
	yw ISC (Dl+)	vinc102.1 ISC (Dl+)	yw EB (NRE-lacZ+)	vinc102.1 EB (NRE-lacZ+)	yw EC (Dl-/lacZ-)	vinc102.1 EC (Dl-/lacZ-)
	10.0273	11.6447	13.9089	12.2916	25.5536	24.9066
	9.057	11.9681	9.7039	10.9977	43.9909	22.6424
	8.0866	10.0273	8.7335	17.1435	44.6379	23.6128
	8.7335	12.2916	14.8793	16.4966	43.0206	20.7016
	10.6743	12.9385	15.2027	16.1731	46.5787	21.0251
	8.7335	6.7927	11.6447	19.7312	25.5536	23.9362
	8.7335	7.4396	10.9977	12.615	26.524	21.3485
	10.3508	6.1458	8.7335	19.4078	27.1709	23.9362
	7.7631	10.6743	13.5854	20.0547	47.8725	21.672
	9.057	6.4693	13.5854	15.8497	28.7882	20.7016
	10.6743	15.5262	16.4966	15.8497	28.1413	25.5535
	10.0273	16.4966	9.057	19.7312	49.4898	23.9362
	8.0866	13.5854	8.41	18.1139	30.082	22.9658
	11.6447	9.057	9.057	19.7312	51.7541	23.2893
	9.057	11.9681	8.7335	21.672	28.1413	21.0251
	8.41	8.7335	15.8497	18.7608	33.6401	21.9955
	8.7335	15.2027	8.41	16.1731	31.0524	23.2893
	12.9385	10.0273	13.9089	20.0547	28.7882	22.3189
	10.9977	12.615	9.7039	11.3212	30.729	17.467
	4.5285	8.41	8.41	18.7608	27.8178	20.7016
	11.9681	10.0273	9.057	17.1435	32.6697	25.877
	6.4693	11.6447	8.0866	24.2597	49.4898	22.3189
	4.8519	8.7335	7.1162	30.729	29.1117	21.9955
	6.7927	9.7039	10.0273	21.9955	33.3167	26.8474
	8.7335	8.41	16.4966	30.4055	34.934	26.2005
	5.8223	8.7335	9.3804	58.5467	49.4898	24.5832
	9.057	12.615	10.0273	18.1139	31.0524	26.5239
	9.7039	3.8816	8.7335	14.2324	32.6697	35.5809
	5.8223	17.7904	14.5558	20.0547	48.196	21.9955
	10.6743	17.7904	9.7039	23.9362	55.6356	21.9955
	10.9977	12.615	10.9977	12.615	52.7244	26.5239
	10.9977	8.7335	10.6743	16.4966	52.7244	21.672
	8.7335	8.0866	12.2916	20.7016	31.0524	25.877
	8.7335	11.6447	14.2324	19.0843	51.4306	20.7016
	11.3212	13.5854	17.1435	18.7608	33.3167	24.9066
	6.1458	8.0866	16.4966	17.7904	55.3121	21.672
	11.6447	9.3804	14.5558	17.1435	56.2825	21.3485
		7.7631	15.2027	19.0843	49.8133	20.7016
		16.1731	14.5558	12.615	43.6675	17.1435
		11.3212	6.7927	17.7904	50.4602	18.1139
		9.057	10.0273	13.9089	28.4647	23.9362
		7.7631	10.3508	16.4966	51.4306	14.2324
		9.057	9.057	16.8201	49.8133	24.5832
		8.41	11.6447	13.5854	30.4055	20.7016
		10.6743	15.8497	10.0273	50.4602	23.9362
		9.3804	11.6447	13.5854	50.4602	21.672
			13.5854	16.4966	31.6994	22.3189
			9.057	17.7904	51.4306	23.9362
			9.7039	17.7904	49.1664	23.9362
			9.7039	27.1709	30.729	24.5832
			6.7927	14.8793	57.5764	25.5535
			17.467	18.4374	33.6401	26.5239
			10.3508	16.8201	51.1071	24.5832
			10.3508	24.2597	49.1664	24.9066
			10.0273	16.1731	31.6994	21.9955
			16.1731	22.6424	46.5787	24.9066
			10.6743	17.7904	52.0775	22.9658
			15.5262	14.2324	48.8429	19.7312
			15.2027	20.3781	30.082	21.9955
				16.8201	27.8178	23.9362
				15.2027	51.4306	21.672
				15.2027	49.8133	23.9362
				20.3781	53.6948	30.082
				17.7904	52.0775	24.9066
				24.5832	50.4602	25.5535
				17.7904	29.4351	23.2893
				13.5854	48.5194	25.2301
				19.0843	50.7837	24.2597
				24.5832	48.8429	26.2005
				20.7016	50.7837	16.4966
				14.2324	46.9021	16.4966
				7.7631	35.5809	25.2301
				17.1435	53.3714	28.4647
				12.2916	33.9636	21.672
				12.2916	31.0524	27.1709
				15.5262	50.7837	24.9066
				10.3508	30.4055	24.9066
				14.2324	31.3759	24.9066
				11.6447	27.1709	24.2597
				26.8474	53.0479	23.2893
				14.2324	51.4306	24.2597
				18.1139	35.9044	16.4966
				15.2027	29.4351	19.4078
				15.5262	31.3759	22.9658
				14.2324	32.3463	26.2005
				11.3212	32.9932	27.4943
				11.6447	51.1071	26.2005
				14.2324	51.1071	23.6128
				15.8497	31.6994	26.5239
				11.9681	52.0775	25.2301
				12.615	31.0524	15.5262
				13.262	48.8429	23.6128
				10.3508	31.3759	26.8474
				15.8497	47.2256	47.549
				13.9089	28.7882	36.2278
					30.4055	51.4306
					31.3759	50.7836
					49.8133	31.3759
					55.3121	28.1413
					32.3463	50.7836
					48.8429	34.287
					49.8133	29.7586
					46.5787	30.729
					50.7837	23.2893
					29.7586	44.3144
					33.9636	30.729
					32.0228	32.0228
					46.9021	28.7882
					32.9932	30.4055
					50.7837	24.5832
					29.7586	28.7882
					22.9659	26.5239
					40.4329	28.4647
					23.9363	28.1413
					20.3782	27.1709
					24.5832	29.7586
					25.2301	37.1982
					24.5832	29.4351
					23.9363	30.729
					34.2871	36.5513
					23.9363	26.2005
					23.6128	25.2301
					22.6424	32.3463
					22.6424	21.0251
					19.0843	29.7586
					24.9066	28.1413
					24.9066	24.5832
					27.8178	25.877
					23.9363	24.9066
					25.2301	25.877
					22.9659	30.082
					27.1709	21.0251
					26.2005	26.8474
					26.2005	26.5239
					34.6105	32.6697
					25.877	29.1116
					24.2597	25.2301
					39.7859	25.5535
					28.4647	27.8178
					25.2301	25.877
					25.2301	23.9362
					24.9066	27.1709
					23.9363	44.3144
					25.5536	32.9932
					44.3144	24.5832
					25.2301	22.3189
					38.1686	25.2301
					34.6105	31.3759
					23.9363	33.6401
					23.6128	18.1139
					25.877	27.4943
					22.6424	32.9932
					43.6675	22.6424
					25.2301	30.082
					25.877	53.0479
					39.7859	27.1709
					41.0798	26.2005
					25.2301	33.9636
					22.6424	15.5262
					26.524	24.9066
					21.3485	52.4009
					25.877	30.729
					21.0251	29.4351
					25.877	26.8474
					24.5832	30.4055
					44.3144	29.1116
					24.5832	31.0524
					41.7267	25.2301
					40.7563	23.6128
					38.4921	32.6697
					39.139	50.7836
					36.8748	28.7882
					41.0798	23.9362
					44.9613	28.7882
					41.0798	32.6697
					26.8474	33.3167
					22.6424	22.6424
					29.4351	28.7882
					24.9066	19.0843
					21.9955	29.1116
					41.7267	24.5832
					24.5832	30.729
					43.9909	28.4647
					26.8474	26.2005
					23.6128	36.8747
					43.9909	27.8178
					44.6379	22.9658
					24.9066	28.7882
					37.8452	35.2574
					25.5536	26.2005
					23.2893	24.2597
					43.6675	28.1413
					28.1413	30.729
					46.9021	31.6993
					42.0502	32.6697
					40.4329	30.729
					24.9066	32.0228
					37.8452	22.3189
					26.2005	31.6993
					43.0206	13.5854
					22.9659	17.1435
					36.2278	19.4078
					25.877	22.9658
					44.3144	24.5832
					25.2301	20.0547
					41.4032	19.4078
					41.0798	18.7608
					24.9066	21.3485
					24.2597	21.3485
					36.2278	20.0547
					28.1413	21.0251
					42.3736	21.9955
					25.2301	19.4078
					43.6675	18.1139
					37.5217	20.7016
					42.0502	20.0547
					26.2005	22.9658
					42.6971	20.3781
					23.6128	18.4374
					38.8155	23.2893
					23.9363	18.7608
					38.1686	22.9658
					44.3144	28.4647
					39.139	25.5535
					24.5832	23.2893
					23.9363	20.0547
					25.877	22.3189
					38.1686	20.7016
					43.6675	20.0547
					25.5536	22.3189
					42.0502	20.0547
					36.8748	19.4078
					26.2005	23.9362
					40.1094	20.3781
					37.5217	20.7016
					22.3189	18.7608
					44.3144	16.8201
					24.9066	16.4966
					40.4329	20.7016
					42.6971	22.6424
					23.2893	20.0547
					36.2278	19.0843
					27.8178	21.9955
					38.4921	25.2301
						19.4078
						18.7608
						23.6128
						23.2893
						14.8793
						18.4374
						24.2597
						21.9955
						24.5832
						17.1435
						21.672
						20.0547
						21.0251
						20.3781
						19.0843
						20.7016
						21.9955
						23.6128
						20.7016
						22.6424
						19.0843
						24.2597
						21.0251
						13.5854
						24.2597
						21.0251
						25.877
						21.9955
						20.0547
						21.3485
						22.9658
						23.9362
						24.5832
						22.9658
						24.2597
						20.0547
						23.2893
						17.467
						19.7312
						19.0843
						25.2301
						19.4078
						24.5832
						22.6424
						20.7016
						22.6424
						23.9362
						20.3781
						40.4328
						23.6128
						23.2893
						22.3189
						20.7016
						30.4055
						31.0524
						32.0228
						27.4943
						27.1709
						22.6424
						17.467
						23.6128
						22.9658
						22.9658
						21.672
						36.8747
						35.2574
						24.5832
						22.3189
						22.6424
						23.2893
						13.262
						22.6424
						20.3781
						28.1413
						24.5832
						32.9932
						24.2597
						39.7859
						23.2893
						21.3485
						19.0843
						13.9089
						41.4032
						25.877
						25.877
						37.1982
						38.1686
						38.8155
						23.2893
						22.3189
						26.5239
						23.6128
						26.5239
						34.6105
						22.3189
						25.2301
						36.8747
						20.3781

## Sheet: Figure 4F
Figure 4F
	Clone size
	number of cell (DAPI+) per Dl+ clone
	14 days
	Ctrl	vinc102.1	vincRNAi #25965
	33	23	34
	3	6	4
	16	14	4
	20	26	14
	77	11	16
	9	4	33
	11	21	13
	21	44	5
	8	25	8
	7	2	44
	19	41	7
	8	20	15
	23	4	8
	11	22	28
	6	4	15
	47	29	22
	16	45	17
	19	5	13
	27	9	39
	36	5	18
	6	11	4
	9	4	6
	11	18	6
	10	6	6
	5	4	23
	7	2	15
	21	25	4
	12	8	26
	7	9	24
	24	16	8
	3	5	18
	30	6	13
	5	27	37
	3	9	7
	14	9	37
	7	17	8
	44	22	11
	18	58	27
	11	41	56
	25	34	32
	7	6
	11	9
	8	8
	31	26
	9	11
	5	22
	20	6
	12	33
	11	25
	10	6
	10	26
	8	4
	45	15
	23	5
	3	17
	8	8
		27
		26

## Sheet: Figure 4G
Figure 4G
	ISC proportion
	Dl+ cells ratio over total number of DAPI nuclei in each multicellular clones
	14 days
	Ctrl	vinc102.1	vincRNAi #25965
	0.030303	0.0869565	0.125
	0.25	0.166667	0
	0.333333	0	0.0909091
	0.125	0.0714286	0.0740741
	0.05	0.0384615	0.0892857
	0	0.0909091	0
	0.116883	0.25	0
	0.222222	0.047619	0.205882
	0.166667	0.113636	0
	0.103448	0.08	0.25
	0.115385	0.5	0.25
	0.181818	0	0.0714286
	0.142857	0.195122	0
	0.0952381	0.1	0.0625
	0.166667	0.25	0.030303
	0.0833333	0	0
	0.125	0.136364	0
	0	0.25	0
	0.3	0.103448	0.153846
	0.142857	0	0
	0.142857	0.111111	0.2
	0	0	0
	0	0	0
	0.142857	0.2	0.125
	0.0526316	0	0.115385
	0.125	0	0.0666667
	0.217391	0	0
	0.115385	0	0.0909091
	0	0.111111	0
	0.0909091	0	0.0909091
	0.125	0	0.166667
	0.166667	0.2	0
	0.2	0.0909091	0.142857
	0.277778	0.25	0.0666667
	0.106383	0	0.166667
	0.142857	0.111111	0.125
	0.111111	0.166667	0
	0.0625	0	0.125
	0.157895	0.25	0.0714286
	0.111111	0.5	0.133333
	0.0909091	0.16	0
	0.2	0	0
	0.111111	0.125	0
	0.166667	0.222222	0
	0.222222	0	0.0454546
	0.0909091	0.125	0
	0.1	0	0.0588235
	0.2	0	0
	0.285714	0	0
	0.190476	0.2	0
	0.166667	0	0
	0.142857	0.166667	0.0769231
	0.166667	0.111111	0
	0.333333	0.111111	0.0512821
	0	0.111111	0.0555556
	0.0666667	0.117647	0.25
	0.2	0.181818	0
	0.333333	0.103448	0
	0.142857	0.121951	0
	0.142857	0.0588235	0
	0.181818	0.166667	0.166667
	0.277778	0	0
	0.0909091	0.111111	0.166667
	0	0.125	0.166667
	0	0	0.0434783
	0.16	0.0384615	0.0666667
	0.142857	0.0909091	0
	0.181818	0	0
	0.25	0.136364	0.25
	0.129032	0.166667	0
	0.222222	0.121212	0.0384615
	0.2	0.12	0.0416667
	0.25	0.166667	0.125
	0.25	0.192308	0.0555556
	0.181818	0.25	0
	0.2	0	0
	0.2	0	0.0769231
	0.125	0	0
	0.0888889	0.133333	0
	0.173913	0.2	0
	0.333333	0.176471	0
	0	0.25	0
	0.25	0	0.0810811
	0	0.185185	0
	0	0.153846	0
		0	0
			0
			0
			0.142857
			0
			0.0810811
			0

## Sheet: Figure 4-Supplement 1
Figure 4-Supplement 1
	JAK/STAT activation
	ratio of GFP+ cells over total number of DAPI nuclei
	14 days
	yw	vinc102.1
	33.3333	44.8148
	36.8771	53.0957
	41.0468	46.2199
		47.5634
		51.1076

## Sheet: Figure 4-Supplement 2A
Figure 4-figure supplement 2A
	EE proportion
	ratio of pros+ cells over total number of DAPI nuclei in each clones
	14 days
	Ctrl	vinc102.1	vincRNAi #25965
	0	0.0869565	0
	0.166667	0	0
	0	0	0
	0.125	0.142857	0
	0.05	0.0384615	0
	0	0	0.5
	0.025974	0	0.125
	0	0.142857	0.030303
	0.0833333	0.0227273	0
	0.103448	0	0
	0	0.16	0
	0	0	0
	0.107143	0	0
	0	0.097561	0
	0	0.05	0.166667
	0	0	0
	0	0	0
	0.285714	0	0
	0	0.0454546	0
	0	0	0
	0	0.0344828	0.0227273
	0.285714	0	0
	0	0.0444444	0
	0	0	0
	0	0	0
	0.157895	0	0
	0	0	0
	0	0	0.166667
	0	0	0
	0.153846	0.2	0.375
	0	0	0
	0.181818	0	0.0714286
	0	0	0
	0	0.222222	0
	0	0	0
	0	0.5	0
	0	0	0
	0.0425532	0.181818	0
	0	0	0.111111
	0	0	0
	0.0625	0.333333	0.0909091
	0	0	0.333333
	0.0740741	0	0.117647
	0	0	0
	0	0	0
	0.111111	0.111111	0
	0	0.333333	0
	0	0	0
	0	0	0
	0	0	0
	0	0	0.0769231
	0	0.04	0
	0	0.25	0
	0	0	0.111111
	0	0.25	0.142857
	0.0833333	0	0
	0	0.166667	0.166667
	0	0	0
	0	0	0.166667
	0	0.125	0
	0.0333333	0	0
	0	0	0
	0	0	0
	0.0714286	0	0
	0	0	0
	0.0681818	0	0
	0	0	0
	0	0	0
	0	0	0.25
	0.2	0	0
	0.04	0.117647	0.115385
	0	0	0.0833333
	0	0.0517241	0
	0	0.0487805	0.111111
	0	0.0588235	0
	0	0	0
	0.0322581	0	0
	0	0	0
	0	0	0
	0	0	0
	0	0.25	0
	0.0833333	0	0
	0	0.0384615	0
	0	0	0.0810811
	0	0	0
	0.1	0	0
	0	0	0
	0.111111	0	0
	0	0.227273	0.0909091
	0	0.166667	0
	0	0.0909091	0.2
	0	0	0.054054
	0	0	0
	0	0.0769231	0
	0	0	0
		0.2	0
		0.333333	0
		0.333333	0.0740741
		0.133333	0.0357143
		0	0
		0.117647	0.2
		0	0
		0
		0
		0.0384615
		0

## Sheet: Figure 4-Supplement 2B
Figure 4-figure supplement 2B
	Nuclear size (all cells)
	DAPI area of all cell types inside clones
	14 days
	MARCM19A	MARCM19A + vincRNAi
	27.7917	62.4283
	39.7485	21.0251
	11.3106	40.4328
	8.7253	15.5262
	78.2044	33.3167
	7.7558	40.4328
	49.7665	51.1071
	8.4021	15.2027
	19.0664	27.8178
	45.8886	10.0273
	27.4685	42.3736
	55.5833	39.7859
	66.2476	43.0205
	48.797	22.3189
	16.8043	34.934
	4.2011	3.8816
	59.4612	15.5262
	39.1022	46.9021
	25.5295	10.3508
	6.4632	19.0843
	47.1812	2.9112
	8.7253	55.959
	16.1579	42.0501
	4.5242	56.606
	12.9264	15.2027
	45.5654	38.8155
	12.28	54.9887
	38.7791	34.287
	18.7432	18.4374
	13.5727	46.2552
	4.8474	22.3189
	10.6642	50.4602
	41.6875	22.6424
	13.8958	2.9112
	48.4738	61.1344
	15.8348	3.8816
	54.2907	17.7904
	0.3232	59.8406
	36.8401	21.9955
	12.28	12.2916
	5.8169	33.3167
	2.9084	18.1139
	5.8169	23.2893
	27.1453	2.9112
	39.7485	40.4328
	19.0664	32.3463
	29.0843	10.9977
	44.9191	7.1162
	17.1274	2.9112
	3.8779	22.3189
	42.9801	78.9249
	30.3769	59.8406
	38.4559	11.6447
	45.5654	47.2255
	70.7718	2.9112
	78.5276	18.4374
	75.6192	69.221
	53.9675	15.2027
	31.6696	14.2324
	17.4506	6.7927
	13.5727	50.4602
	25.5295	16.8201
	68.8328	20.3781
	22.298	55.6356
	58.8149	2.9112
	22.6211	61.7814
	52.0286	10.0273
	58.8149	6.7927
	7.1095	54.0183
	4.5242	23.9362
	3.8779	45.6082
	13.5727	34.6105
	24.5601	49.8132
	64.9549	44.3144
	9.6948	12.615
	51.0591	69.5445
	10.0179	36.8747
	52.3517	64.0456
	4.8474	6.4693
	58.4918	13.9089
	21.6516	44.9613
	70.7718	41.7267
	54.6138	31.0524
	39.1022	3.8816
	18.7432	61.4579
	56.2296	38.8155
	10.6642	43.6675
	8.4021	50.4602
	50.7359	41.4032
	21.0053	44.6378
	5.8169	34.6105
	8.4021	20.3781
	39.7485	33.6401
	7.1095	24.5832
	24.8832	57.5764
	8.7253	5.1754
	21.3285	2.9112
	6.4632	60.1641
	7.4327	56.2825
	9.0484	13.262
	44.2728	11.9681
	4.8474	5.1754
	7.7558	11.9681
	7.1095	7.1162
	44.9191	55.6356
	44.5959	59.8406
	12.6032	5.8223
	80.1434	12.615
	48.4738	59.8406
	3.8779	5.4989
	10.6642	26.8474
	92.1003	8.7335
	2.9084	30.4055
	10.9874	10.6743
	42.0107	17.467
	71.4181	8.41
	92.4234	15.8497
	39.7485	3.8816
	21.6516	70.1914
	49.7665	12.9385
	34.578	13.9089
	20.359	56.606
	21.0053	62.7518
	13.2495	13.262
	9.6948	46.5786
	2.9084	40.7563
	8.079	9.7039
	13.2495	95.098
	7.1095	21.0251
	21.3285	24.5832
	10.3411	36.8747
	14.8653	13.9089
	32.3159	66.6333
	28.7611	14.2324
	9.0484	20.0547
	10.6642	2.9112
	52.3517	10.3508
	24.2369	24.9066
	2.9084	59.5171
	10.0179	35.2574
	20.6822	63.7221
	24.5601	7.4396
	63.016	9.057
	42.0107	59.1937
	38.4559	38.4921
	20.6822	16.1731
	59.1381	42.3736
	26.1759	32.6697
	10.3411	5.1754
	12.28	6.1458
	52.3517	51.754
	16.4811	2.9112
	15.1885	16.1731
	7.7558	6.1458
	4.8474	3.2346
	7.426	50.4602
	7.426	38.4921
	13.5604	35.2574
	7.1031	8.7335
	4.843	6.7927
	4.843	56.9294
	20.0178	55.959
	27.7666	62.7518
	46.17	32.3463
	45.5243	28.7882
	8.0717	4.8519
	38.4212	41.7267
	61.6677	24.2597
	10.0089	18.7608
	9.686	29.7586
	38.0984	33.6401
	8.7174	3.8816
	12.5918	39.139
	2.9058	35.9044
	25.1837	39.139
	11.6232	47.2255
	40.6813	57.2529
	41.0042	50.4602
	13.2376	19.0843
	38.4212	82.483
	27.7666	20.0356
	29.7038	52.028
	37.1298	26.4987
	37.4526	14.8651
	9.686	49.4428
	44.2328	34.9008
	32.2867	17.1272
	60.6991	23.5903
	5.8116	14.8651
	31.641	24.5598
	14.8519	19.0662
	27.4437	11.6336
	8.7174	9.6947
	31.3181	41.0407
	28.7352	23.5903
	33.9011	14.542
	34.5468	27.1451
	11.9461	7.7557
	17.7577	17.7735
	10.9775	31.6692
	46.17	33.285
	43.2642	25.2061
	35.5154	9.6947
	23.2465	7.1094
	14.529	2.9084
	4.5201	6.4631
	19.0492	8.402
	3.8744	46.2112
	27.1209	5.1705
	2.9058	12.2799
	27.7666	15.8346
	20.9864	18.4199
	20.9864	6.4631
	12.5918	12.6031
	37.4526	4.8473
	5.8116	3.2316
	31.3181	9.6947
	28.0895	13.2494
	5.1659	3.8779
	10.3318	21.0051
	50.3673	14.8651
	8.3946	41.687
	11.3004	53.6438
	56.1789	8.402
	26.4751	4.5242
	31.3181	8.0789
	27.7666	10.9873
	6.4573	56.8754
	4.843	24.5598
	56.1789	56.5522
	6.1345	23.2672
	9.686	85.313
	2.9058	13.5725
	20.3407	3.2316
	21.6321	10.9873
	45.8472	62.0458
	4.843	27.4682
	69.4165	18.0967
	21.3093	43.3028
	2.9058	32.6387
	69.4165	29.4071
	13.5589	25.5293
	35.8343	5.8168
	5.1653	20.6819
	46.1649	23.2672
	23.8895	47.5038
	34.543	22.2977
	14.8503	5.1705
	22.921	66.57
	2.9055	10.9873
	34.543	19.7125
	27.7635	27.7914
	40.0311	13.5725
	5.1653	10.0178
	20.0156	53.3206
	41.9681	35.2239
	2.9055	44.5954
	7.1023	23.5903
	13.2361	44.9186
	7.1023	38.7787
	27.7635	2.9084
	28.732	33.6082
	9.3621	12.9262
	7.4251	28.4377
	38.7398	18.743
	9.0393	6.7927
	23.2439	43.6675
	42.6138	8.7335
	7.1023	29.7586
	20.9841	31.3759
	12.5904	32.0228
	3.874	32.0228
	14.5274	9.3804
	14.2046	1.9408
	15.8187	3.8816
	2.9055	24.5832
	10.6534	14.5558
	32.606	38.4921
	45.1964	10.6743
	5.1653	28.4647
	39.3854	28.1413
	24.858	34.6105
	33.5745	31.0524
	12.5904	11.3212
	5.811	37.5217
	8.3936	9.7039
	4.8425	62.4283
	8.3936	7.7631
	2.9055	39.139
	2.9055	7.7631
	9.0393	11.9681
	11.9448	45.6082
	22.2754	46.9021
	7.748	10.9977
	26.4722	44.9613
	10.9763	15.2027
	24.5352	43.9909
	24.2124	17.1435
	31.9603	3.8816
	4.5196	40.1094
	41.6453	61.4579
	25.5037	40.1094
	30.0233	12.9385
	18.4014	11.9681
	8.0708	19.7312
	16.7872	54.6652
	59.0782	27.8178
	8.3936	17.467
	52.9444	58.5467
	2.9055	57.5764
	9.0393	6.4693
	14.2046	32.3463
	20.9841	19.4078
	29.1116	29.7586
	37.1982	23.5692
	14.8793	30.0266
	11.9681	15.8205
	4.8519	34.8696
	81.8361	7.7488
	10.9977	12.2689
	4.8519	21.9549
	5.1754	33.2552
	32.3463	44.5556
	14.2324	3.5515
	20.0547	14.2061
	21.3485	26.475
	7.7631	7.7488
	33.6401	7.1031
	38.1686	30.0266
	13.262	5.4887
	10.0273	29.7037
	36.8747	10.9775
	18.7608	8.7174
	24.9066	29.3808
	59.5171	4.1973
	27.8178	3.8744
	28.7882	0.3229
	37.1982	5.1659
	53.3713	4.1973
	67.9272	13.5604
	9.3804	11.6232
	33.9636	14.8519
	71.1618	13.2375
	8.7335	5.8116
	7.1162	9.0403
	45.2848	18.7263
	25.2301	13.8833
	68.5741	31.6409
	10.0273	18.7263
	50.4602	22.2778
	11.6447	20.9863
	13.9089	26.7979
	29.4351	44.2327
	8.41	6.7802
	56.2825	4.1973
	14.8793	9.0403
	7.4396	14.2061
	29.1116	12.9147
	15.8497	5.1659
	63.7221	31.318
	14.2324	29.3808
	6.7927	25.5064
	43.344	30.6723
	23.6128	8.7174
	7.1162	5.8116
	16.4966	10.3317
	7.1162	15.4976
	6.7927	8.7174
	5.1754	11.6232
	12.9218	25.1836
	5.1687	11.6232
	5.1687	45.2013
	7.107	22.2778
	16.7983	3.2287
	41.9957	3.5515
	14.2139	8.0717
	26.1666	22.9235
	37.7962	18.4034
	16.7983	9.686
	28.1048	20.6634
	2.9074	8.3945
	3.5535	10.6546
	16.7983	9.0403
	5.4918	54.8873
	28.4279	12.9147
	13.8909	6.7802
	34.8888	5.1659
	9.6913	63.2818
	15.1831	6.7802
	25.8435	29.3808
	36.181	10.9775
	4.5226	13.2375
	8.3991	19.372
	10.6605	11.6232
	23.2592	19.6948
	30.0431	5.8116
	25.5205	33.2552
	12.9218	11.3003
	42.3188	56.5016
	4.1996	19.6948
	5.1687	23.8921
	5.1687	33.901
	11.3065	52.6272
	49.4258	4.843
	3.8765	10.9775
	27.1357	20.3406
	2.9074	49.0757
	7.43	8.3945
	12.9218	7.7488
	42.3188	11.6232
	7.43	20.9863
	7.7531	11.6232
	38.4423	19.372
	8.3991	13.5604
	7.107	10.6546
	61.3784	41.004
	14.537	57.1474
	9.3683	39.7126
	36.181	17.1119
	9.3683	22.2778
	32.3044	19.0491
	24.8744	60.0531
	28.7509	60.0531
	32.3044	34.5467
	10.0144	6.7802
	16.7983	44.2327
	14.537	22.9235
	14.2139	8.3945
	2.9074	12.9147
	7.43	9.0403
	12.5987	49.7215
	29.7201	7.1031
	23.9053	15.4976
	22.2901	9.0403
	21.644	38.744
	39.7344	11.9461
	19.3827	3.8744
	28.1048	26.7979
	46.1953	9.686
	5.1687	4.843
	12.9218	85.8826
	2.9074	21.6321
	20.0287	17.1119
	12.2757	40.6812
	6.4609	25.5065
	37.4731	10.3317
	10.6605	2.9058
	9.3683	23.2464
	9.0452	15.8205
	15.5061	12.9147
	2.2613	37.1297
	3.8765	13.5604
	10.6605	57.7931
	14.537	39.3897
	33.2736	44.8785
	24.2283	13.5604
	58.148	5.4887
	34.5657	59.0846
	27.7818	6.7802
	2.9074	25.5065
	28.7509	30.9952
	46.5184	34.2239
	29.397	8.3945
	13.5679	11.3003
	10.3374	20.9863
	35.2118	29.7037
	26.1666	48.1071
	42.9649	4.5201
	20.0287	31.3181
	5.1687	31.9638
	41.9957	100.089
	12.9218	34.5467
	66.5471	54.2416
	33.5966	75.8737
	8.0761	7.7488
	2.9074	23.5693
	43.2879	12.5918
	11.6296	24.8607
	14.2139	88.1426
	3.8765	26.4751
	47.4875	52.3044
	8.3991	25.1836
	2.9074	46.4928
	2.9074	23.5693
	13.5679	5.4887
	8.3991	11.6232
	48.4566	17.4348
	11.3065	14.8519
	30.3662	5.8116
	42.6418	47.7843
	13.5679	12.2689
	40.3805	8.3945
	35.5349	17.1119
	4.1996	9.686
	10.0144	20.3406
	20.0287	30.6723
	59.4401	46.8157
	6.4609	6.4573
	33.5966	28.7351
	2.9074	18.0805
	27.4588	6.1345
	10.0144	71.0307
	15.5061	7.7488
	11.3065	12.9147
	11.9526	44.2327
	34.8888	50.3672
	14.2139	22.2778
	15.1831	9.686
	8.7222	25.8293
	20.6748	48.1071
	5.8148	12.9147
	56.8558	47.1385
	29.074	56.1788
	24.2283	23.5693
	6.7839	43.2641
	15.5061	46.8157
	24.8744	38.744
	3.8765	15.4976
	5.8148	14.8519
	37.4731	9.3631
	4.5226	62.3133
	15.1831	59.0846
	12.2757	25.5065
	20.3518	82.6539
	19.3827	23.8921
	33.5782	29.3809
	15.4976	53.9187
	10.0089	7.7488
	17.7577	8.3945
	18.4034	42.9413
	29.7038	37.1297
	33.9011	5.8116
	3.8744	79.1024
	7.426	48.43
	55.8561	20.6635
	14.2062	10.0089
	51.0131	25.5065
	11.9461	12.2689
	17.4348	52.3044
	8.3946	88.1426
	21.3093	4.843
	45.2014	7.7488
	13.2376	12.5918
	12.269	7.4259
	43.2642	9.686
	9.0403	56.8245
	26.4751	59.0846
	27.7666	11.6232
	6.4573	35.1925
	3.8744	65.8648
	3.8744	48.43
	16.4662	74.5822
	43.5871	11.6232
	11.6232	22.6007
	18.7263	18.4034
	61.3448	78.1338
	20.6635	25.1836
	3.8744	60.3761
	15.8205	7.4259
	7.7488	2.9058
	10.6546	14.529
	43.91	18.4034
	78.1339	53.9187
	29.3809	10.9775
	30.3495	19.372
	45.5243	2.9058
	7.7488	16.4662
	44.2328	21.6321
	15.4976	27.7666
	6.1345	87.4971
	78.4568	3.8744
	34.5468	36.1612
	12.9147	17.112
	17.112	10.9775
	19.6949	34.8697
	28.0895	8.7174
	16.4662	45.5243
	51.0131	11.6232
	19.372	4.5201
	25.5065	26.4751
	2.9058	43.2642
	72.968	9.3632
	42.2956	28.4123
	8.7174	30.9953
	42.2956	1.9372
	21.3093	2.5829
	14.8519	23.2465
	10.6546	27.1209
	7.7488	5.1659
	67.4793	23.2465
	67.8022	15.8205
	4.843	9.3632
	53.2731	7.7488
	4.5201	30.6724
	19.372	37.4526
	28.7352	23.5693
	10.0089	15.1748
	63.9278	13.5604
	3.8744	37.7755
	61.6677	24.5379
	76.5196	20.3407
	34.224	17.7577
	21.6321	39.7127
	34.5468	7.7488
	14.8519	22.6007
	8.0717	16.4662
	9.686	65.865
	26.4751	2.9058
	12.269	6.7802
	38.4212	12.5918
	8.7251	46.17
	8.7251	21.955
	34.9003	39.3898
	44.9179	10.9775
	5.1704	13.5604
	7.7556	13.5604
	16.1575	35.8383
	41.3633	23.5693
	15.8344	32.9325
	14.5418	4.843
	6.1399	31.3181
	2.9084	23.2465
	4.8473	62.3134
	23.59	16.4662
	47.18	28.4123
	3.8778	15.8205
	5.8167	14.529
	38.7781	22.9236
	4.8473	11.3004
	44.9179	35.5154
	33.9308	16.1434
	21.3279	12.5918
	11.3103	16.4662
	10.9871	18.0806
	24.5594	3.8744
	28.7604	3.8744
	2.9084	52.6274
	7.1093	6.7802
	18.4196	28.1413
	48.7957	18.4374
	41.6864	41.7267
	20.3585	29.1116
	41.3633	22.6424
	27.791	10.6743
	38.7781	12.615
	41.0401	31.3759
	32.9614	24.5832
	27.1447	32.9932
	14.8649	28.4647
	24.2363	5.8223
	54.2893	32.9932
	18.4196	12.9385
	2.9084	37.1982
	22.2974	9.7039
	7.4325	8.0866
	12.2797	25.5535
	44.2716	2.9112
	21.0048	23.9362
	70.4468	18.1139
	26.1752	13.262
	39.4244	17.1435
	67.2153	4.205
	29.7299	22.6424
	32.6382	6.7927
	26.1752	28.7882
	10.664	51.1071
	12.6029	16.8201
	18.0964	15.8497
	16.1575	44.9613
	10.9871	64.3691
	16.8038	55.3121
	19.7122	40.1094
	24.8826	26.2005
	88.5433	46.2552
	19.389	10.0273
	51.7041	65.016
	17.127	37.1982
	28.4373	70.8383
	26.8215	7.4396
	39.7475	27.8178
	39.4244	63.7221
	62.6912	16.1731
	13.2492	32.0228
	11.3103	19.372
	69.4774	7.7488
	2.9084	12.9147
	6.1399	40.0355
	2.9084	23.5693
	80.4645	40.3584
	9.6945	4.5201
	15.1881	46.17
	24.2363	36.1611
	26.4984	21.6321
	32.3151	10.9775
	2.9084	2.9058
	16.1575	8.7174
	34.9003	27.1208
	6.7862	13.5604
	27.4678	28.4123
	12.926	11.3003
	2.9084	13.5604
	2.9084	36.1611
	88.5433	22.6007
	19.0659	46.4929
	18.0964	5.4887
	45.2411	12.9147
	12.6029	18.4034
	21.6511	20.3406
	28.4373	14.2062
	78.2025	41.6499
	42.3327	36.1611
	14.5418	35.8382
	2.9084	29.7038
	10.9871	2.5829
	29.4067	31.3181
	9.0482	7.7488
	3.8778	29.058
	43.6253	34.2239
	62.0449	28.4123
	39.1012	26.4751
	50.4115	20.9864
	82.0803	8.0717
	67.2153	9.3631
	17.7733	12.269
	30.3762	19.6949
	24.5594	26.798
	30.6993	35.8382
	13.5723	18.0806
	3.8743	6.4573
	4.8429	30.6724
	2.9057	32.9324
	5.8115	22.9236
	9.0401	27.7666
	11.9458	39.3898
	48.7519	7.4259
	35.5146	15.8205
	48.1062	9.0403
	21.6316	62.3134
	62.312	42.9413
	36.4832	16.7891
	40.3575	12.269
	2.9057	61.9905
	6.1343	30.6724
	29.3803	58.4389
	10.0087	22.6007
	2.9057	43.2642
	2.9057	8.0717
	3.8743	34.8696
	2.9057	36.8069
	46.8147	26.1522
	57.792	54.8874
	6.4572	3.8744
	2.9057	9.686
	10.6544	8.3945
	25.8288	47.4615
	17.7573	2.9058
	53.5948	12.9147
	51.0119	6.7802
	48.1062	23.8922
	41.3261	19.372
	54.5634	14.2062
	38.4204	18.0806
	66.5092	47.7843
	60.3749	47.1386
	9.6858	13.2376
	43.2633	29.058
	37.1289	48.4301
	9.3629	37.7755
	9.3629	24.8608
	36.8061	22.2778
	20.3402	75.228
	11.623	78.7796
	7.1029	14.2062
	20.3402	17.7577
	15.1744	50.0444
	13.5601	11.3003
	35.8375	20.0178
	40.3575	23.5693
	14.5287	10.0089
	45.5233	40.3584
	36.1603	10.9775
	35.1918	63.6048
	54.5634	20.6635
	28.7346	9.3631
	3.8743	24.215
	70.0607	54.8874
	15.8202	48.4301
	10.6544	10.0089
	9.6858	49.0758
	34.546	19.0492
	30.026	13.8833
	45.5233	24.215
	7.1029	64.2506
	26.4745	47.1386
	7.1029	8.0717
	25.506	37.1297
	11.623	14.8519
	23.2459	32.2867
	25.1831	24.215
	10.3315	12.5918
	12.5916	63.9277
	28.4117	20.0178
	12.5916	24.5379
	8.0715	58.4389
	28.4117	29.3809
	20.3402	38.4212
	53.2719	43.9099
	18.0802	46.8157
	42.2947	17.4348
	35.8375	35.5154
	21.6316	16.1434
	25.1831	20.9864
	17.7573	14.529
	32.9317	27.4437
	25.506	32.9324
	4.52	23.8922
	23.2459	7.4259
	48.429	62.6362
	4.8429	9.686
	8.3944	19.6949
	35.5146	4.5201
	16.4659	24.5379
	45.8462	52.3045
	62.9578	14.529
	24.2145	37.4526
	42.9404	34.5468
	30.3489	33.2553
	21.6316	18.4034
	23.2459	2.9058
	20.9859	20.9864
	20.3402	34.224
	33.9003	15.1748
	41.9718	20.0178
	55.532	5.4888
	6.4572	45.5244
	35.5146	42.2957
	26.4745	6.4574
	62.312	19.3721
	32.286	3.8744
	6.4572	20.3407
	38.0975	2.9058
	24.2145	13.8833
	13.883	6.7802
	43.2633	19.3721
	35.1918	19.6949
	7.7486	62.6363
	18.0802	31.3182
	54.5634	20.6635
	9.0401	7.1031
	46.4919	48.4302
	26.1517	10.9775
	5.1658	61.3449
	36.4832	57.1476
	30.026	23.2465
	35.8375	37.7755
	11.623	17.112
	10.6544	49.0759
	15.4973	65.2193
	12.5916	46.493
	36.8061	126.241
	10.3315	15.1748
	18.0802	25.8294
	51.6576	30.0267
	21.6316	53.9189
	60.052	18.4035
	35.1918	17.4349
	7.4258	26.798
	48.1062	30.9953
	5.1658	9.686
	34.8689	21.6321
	50.0433	12.9147
	8.0715	31.641
	27.766	50.6902
	32.286	13.2376
	4.8429	6.1345
	23.5688	67.4794
	26.4745	13.2376
	15.4973	58.4391
	9.3629	13.8833
	35.5146	20.0178
	37.4518	9.686
	7.4258	27.4438
	9.6858	91.6944
	17.4345	40.0356
	3.5515	19.6949
	25.8288	3.8744
	20.9859	9.686
	19.6945	10.6546
	8.0715	34.5469
	3.8743	10.3318
	70.0607	33.9011
	3.8743	30.6724
	57.792	32.9325
	25.8288	14.2062
	47.7833	3.8744
	8.7172	49.3988
	31.6403	51.6588
	81.0379	2.9058
	18.0802	3.8744
	38.4204	41.0042
	49.3976	37.4527
	80.7151	2.9058
	2.9057	36.1612
	36.1603	7.7488
	27.4431	54.8875
	12.2687	52.3046
	3.8743	13.2376
	56.5005	22.9236
	30.6717	17.7577
	65.5406	17.112
	2.9057	28.4124
	51.9805	27.1209
	15.8202	33.2554
	12.9144	9.686
	20.0173	52.9503
	15.8202	10.0089
	31.3174	3.8744
	57.792	45.8472
	2.9057	18.0806
	4.52	30.3496
	2.9057	38.4213
	16.7887	28.7352
	31.3174	54.5647
	66.8321	17.4349
	27.1203	61.9906
	7.1029	3.8744
	33.5775	74.2596
	2.9057	5.8116
	13.5601	9.0403
	14.2059	9.3632
	10.0087	32.6096
	14.2059	23.8922
	2.9057	66.5108
	14.8516	20.0178
	48.7519	23.2465
	30.9946	3.8744
		24.8607
		14.8519
		8.0717
		31.3181
		3.8744
		49.0757
		29.058
		7.1031
		64.2505
		26.7979
		40.6812
		50.0443
		10.0089
		6.7802
		4.843
		26.7979
		8.7174
		12.5918
		37.1297
		54.5645
		41.9727
		41.9727
		18.0805
		57.7931
		6.7802
		22.6007
		4.843
		32.9324
		33.2553
		11.9461
		54.5645
		47.1385
		7.7488
		30.3495
		30.9952
		98.7972
		6.7802
		43.9099
		74.5822
		14.2061
		12.5918
		63.2819
		32.9324
		50.6901
		22.6007
		46.4928
		34.8696
		5.4887
		27.4437
		12.5918
		46.8157
		24.5379
		19.372
		3.8744
		7.4259
		41.6498
		15.4976
		76.1966
		4.843
		8.0717
		43.587
		46.4928
		11.6232
		58.4389
		2.9058
		4.5201
		51.0129
		55.2102
		22.2778
		2.9058
		42.9413
		49.0757
		2.9058
		45.5242
		12.2689
		33.5781
		9.3631
		61.0218
		57.1474
		24.5379
		75.5508
		28.7351
		50.3672
		7.7488
		11.3003
		6.7802
		45.8471
		37.1297
		4.1973
		77.8109
		46.8157
		23.5693
		6.7802
		23.2464
		11.9461
		51.3358
		88.4655
		3.8744
		2.9058
		2.9058
		3.8744
		56.1788
		11.6232
		15.1747
		48.7529
		76.1966
		8.0717
		24.5379
		17.7577
		76.1966
		2.9058
		13.2375
		24.8607
		59.7304
		3.8744
		3.8744
		16.4662
		5.4887
		10.0273
		21.0251
		42.3736
		30.082
		18.7608
		9.057
		2.9112
		5.1754
		8.0866
		38.8155
		5.1754
		7.1162
		14.8793
		10.9977
		2.9112
		26.5239
		11.3212
		6.1458
		13.262
		32.0228
		40.4328
		26.2005
		14.5558
		43.0205
		4.8519
		43.0205
		31.0524
		36.8747
		8.7335
		18.1139
		9.3804
		19.0843
		12.2916
		6.4693
		2.9112
		15.2027
		13.5854
		14.2324
		13.5854
		10.0273
		33.3167
		8.7335
		31.0524
		36.2278
		2.9112
		14.5558
		39.4624
		37.5217
		4.8519
		3.2346
		9.057
		6.1458
		10.3508
		26.2005
		13.5854
		5.1754
		10.3508
		19.7312
		14.8793
		3.5581
		16.1731
		6.7927
		14.8793
		58.8702
		9.3804
		49.8132
		5.1754
		2.9112
		6.7927
		54.3417
		3.8816
		70.8383
		12.2916
		22.3189
		1.9408
		10.3508
		7.7631
		58.8702
		40.7563
		15.5262
		20.3781
		39.139
		7.7631
		44.6378
		18.4374
		28.4374
		6.463
		16.4807
		45.8875
		40.0708
		58.4905
		19.066
		22.9438
		29.73
		5.4936
		44.9181
		7.1093
		27.1447
		33.6078
		15.8344
		28.4374
		3.5547
		54.9358
		13.8955
		9.3714
		27.4679
		13.2492
		49.1191
		41.6866
		8.7251
		46.5338
		52.9969
		2.9084
		35.2235
		36.5161
		19.3891
		36.193
		13.5724
		42.9792
		48.4728
		18.7428
		10.3409
		17.4502
		21.9743
		46.5338
		8.4019
		26.8216
		35.2235
		7.7556
		28.7605
		11.9566
		12.9261
		39.7477
		27.1447
		8.0788
		48.7959
		40.394
		27.1447
		9.0482
		23.5901
		34.2541
		24.8827
		5.4936
		22.2975
		2.2621
		47.8265
		38.4551
		31.6689
		31.0226
		20.6817
		11.6335
		22.6206
		47.5033
		21.9743
		46.857
		24.5595
		2.9084
		9.0482
		15.8344
		7.1093
		54.9358
		32.3152
		16.1576
		29.73
		14.5418
		14.5418
		31.0226
		14.5418
		45.5644
		10.9872
		63.0146
		14.5418
		19.066
		49.4422
		15.1881
		8.7251
		16.1576
		13.8955
		26.1753
		23.5901
		10.9872

## Sheet: Figure 4-Supplement 2B_zoom
Figure 4-figure supplement 2B zoom
	Nuclear size (excluding Ecs)
	DAPI area of all cell types inside clones excluding EC's
	14 days
	Ctrl	vincRNAi #25965
	0.3232	0.3229
	2.2613	1.9372
	2.9055	1.9408
	2.9055	1.9408
	2.9055	2.2621
	2.9055	2.5829
	2.9055	2.5829
	2.9055	2.9058
	2.9057	2.9058
	2.9057	2.9058
	2.9057	2.9058
	2.9057	2.9058
	2.9057	2.9058
	2.9057	2.9058
	2.9057	2.9058
	2.9057	2.9058
	2.9057	2.9058
	2.9057	2.9058
	2.9057	2.9058
	2.9057	2.9058
	2.9058	2.9058
	2.9058	2.9058
	2.9058	2.9058
	2.9058	2.9084
	2.9058	2.9084
	2.9074	2.9084
	2.9074	2.9084
	2.9074	2.9112
	2.9074	2.9112
	2.9074	2.9112
	2.9074	2.9112
	2.9074	2.9112
	2.9074	2.9112
	2.9074	2.9112
	2.9084	2.9112
	2.9084	2.9112
	2.9084	2.9112
	2.9084	2.9112
	2.9084	2.9112
	2.9084	2.9112
	2.9084	2.9112
	2.9084	2.9112
	2.9084	3.2287
	2.9084	3.2316
	2.9084	3.2316
	2.9084	3.2346
	2.9084	3.2346
	3.5515	3.5515
	3.5535	3.5515
	3.874	3.5547
	3.8743	3.5581
	3.8743	3.8744
	3.8743	3.8744
	3.8743	3.8744
	3.8743	3.8744
	3.8743	3.8744
	3.8744	3.8744
	3.8744	3.8744
	3.8744	3.8744
	3.8744	3.8744
	3.8744	3.8744
	3.8744	3.8744
	3.8765	3.8744
	3.8765	3.8744
	3.8765	3.8744
	3.8765	3.8744
	3.8778	3.8744
	3.8778	3.8744
	3.8779	3.8744
	3.8779	3.8744
	3.8779	3.8779
	4.1996	3.8816
	4.1996	3.8816
	4.2011	3.8816
	4.5196	3.8816
	4.52	3.8816
	4.52	3.8816
	4.5201	3.8816
	4.5201	3.8816
	4.5226	4.1973
	4.5226	4.1973
	4.5242	4.1973
	4.5242	4.1973
	4.8425	4.205
	4.8429	4.5201
	4.8429	4.5201
	4.8429	4.5201
	4.843	4.5201
	4.843	4.5201
	4.843	4.5242
	4.843	4.843
	4.843	4.843
	4.8473	4.843
	4.8473	4.843
	4.8474	4.843
	4.8474	4.843
	4.8474	4.843
	4.8474	4.8473
	4.8519	4.8519
	4.8519	4.8519
	5.1653	4.8519
	5.1653	5.1659
	5.1653	5.1659
	5.1658	5.1659
	5.1658	5.1659
	5.1659	5.1705
	5.1687	5.1705
	5.1687	5.1754
	5.1687	5.1754
	5.1687	5.1754
	5.1687	5.1754
	5.1687	5.1754
	5.1704	5.1754
	5.1754	5.1754
	5.1754	5.4887
	5.4918	5.4887
	5.811	5.4887
	5.8115	5.4887
	5.8116	5.4887
	5.8116	5.4887
	5.8148	5.4888
	5.8148	5.4936
	5.8167	5.4936
	5.8169	5.4989
	5.8169	5.8116
	5.8169	5.8116
	6.1343	5.8116
	6.1345	5.8116
	6.1345	5.8116
	6.1399	5.8116
	6.1399	5.8168
	6.4572	5.8223
	6.4572	5.8223
	6.4572	6.1345
	6.4573	6.1345
	6.4573	6.1458
	6.4609	6.1458
	6.4609	6.1458
	6.4632	6.1458
	6.4632	6.4573
	6.7839	6.4573
	6.7862	6.4574
	6.7927	6.463
	6.7927	6.4631
	7.1023	6.4631
	7.1023	6.4693
	7.1023	6.4693
	7.1029	6.4693
	7.1029	6.7802
	7.1029	6.7802
	7.1029	6.7802
	7.1031	6.7802
	7.107	6.7802
	7.107	6.7802
	7.1093	6.7802
	7.1095	6.7802
	7.1095	6.7802
	7.1095	6.7802
	7.1095	6.7802
	7.1162	6.7802
	7.1162	6.7802
	7.1162	6.7802
	7.4251	6.7927
	7.4258	6.7927
	7.4258	6.7927
	7.426	6.7927
	7.426	6.7927
	7.426	6.7927
	7.43	6.7927
	7.43	7.1031
	7.43	7.1031
	7.4325	7.1031
	7.4327	7.1031
	7.4396	7.1093
	7.748	7.1093
	7.7486	7.1094
	7.7488	7.1162
	7.7488	7.1162
	7.7488	7.1162
	7.7531	7.4259
	7.7556	7.4259
	7.7558	7.4259
	7.7558	7.4259
	7.7558	7.4259
	7.7631	7.4396
	8.0708	7.4396
	8.0715	7.7488
	8.0715	7.7488
	8.0715	7.7488
	8.0717	7.7488
	8.0717	7.7488
	8.0761	7.7488
	8.079	7.7488
	8.3936	7.7488
	8.3936	7.7488
	8.3936	7.7488
	8.3944	7.7488
	8.3946	7.7488
	8.3946	7.7488
	8.3991	7.7488
	8.3991	7.7556
	8.3991	7.7557
	8.3991	7.7631
	8.4021	7.7631
	8.4021	7.7631
	8.4021	7.7631
	8.41	8.0717
	8.7172	8.0717
	8.7174	8.0717
	8.7174	8.0717
	8.7174	8.0717
	8.7222	8.0717
	8.7251	8.0717
	8.7251	8.0788
	8.7253	8.0789
	8.7253	8.0866
	8.7253	8.0866
	8.7335	8.3945
	9.0393	8.3945
	9.0393	8.3945
	9.0393	8.3945
	9.0401	8.3945
	9.0401	8.3945
	9.0403	8.3945
	9.0452	8.4019
	9.0482	8.402
	9.0484	8.402
	9.0484	8.41
	9.3621	8.7174
	9.3629	8.7174
	9.3629	8.7174
	9.3629	8.7174
	9.3683	8.7174
	9.3683	8.7174
	9.3683	8.7251
	9.3804	8.7251
	9.6858	8.7335
	9.6858	8.7335
	9.6858	8.7335
	9.686	8.7335
	9.686	8.7335
	9.686	9.0403
	9.686	9.0403
	9.6913	9.0403
	9.6945	9.0403
	9.6948	9.0403
	9.6948	9.0403
	10.0087	9.0403
	10.0087	9.0482
	10.0089	9.0482
	10.0089	9.057
	10.0089	9.057
	10.0144	9.057
	10.0144	9.3631
	10.0144	9.3631
	10.0179	9.3631
	10.0179	9.3631
	10.0273	9.3632
	10.0273	9.3632
	10.3315	9.3632
	10.3315	9.3714
	10.3318	9.3804
	10.3374	9.3804
	10.3411	9.3804
	10.3411	9.686
	10.6534	9.686
	10.6544	9.686
	10.6544	9.686
	10.6544	9.686
	10.6546	9.686
	10.6546	9.686
	10.6605	9.686
	10.6605	9.686
	10.6605	9.686
	10.664	9.686
	10.6642	9.6947
	10.6642	9.6947
	10.6642	9.6947
	10.6642	9.7039
	10.9763	9.7039
	10.9775	9.7039
	10.9871	10.0089
	10.9871	10.0089
	10.9871	10.0089
	10.9874	10.0089
	10.9977	10.0089
	11.3004	10.0178
	11.3065	10.0273
	11.3065	10.0273
	11.3065	10.0273
	11.3103	10.0273
	11.3103	10.0273
	11.3106	10.3317
	11.623	10.3317
	11.623	10.3318
	11.623	10.3409
	11.6232	10.3508
	11.6232	10.3508
	11.6296	10.3508
	11.6447	10.3508
	11.9448	10.3508
	11.9458	10.6546
	11.9461	10.6546
	11.9461	10.6546
	11.9526	10.6743
	11.9681	10.6743
	12.2687	10.6743
	12.269	10.9775
	12.269	10.9775
	12.2757	10.9775
	12.2757	10.9775
	12.2797	10.9775
	12.28	10.9775
	12.28	10.9775
	12.28	10.9775
	12.5904	10.9775
	12.5904	10.9872
	12.5916	10.9872
	12.5916	10.9873
	12.5916	10.9873
	12.5918	10.9873
	12.5918	10.9977
	12.5987	10.9977
	12.6029	10.9977
	12.6029	11.3003
	12.6032	11.3003
	12.9144	11.3003
	12.9147	11.3003
	12.9218	11.3003
	12.9218	11.3004
	12.9218	11.3212
	12.9218	11.3212
	12.9218	11.6232
	12.926	11.6232
	12.9264	11.6232
	13.2361	11.6232
	13.2376	11.6232
	13.2376	11.6232
	13.2492	11.6232
	13.2495	11.6232
	13.2495	11.6232
	13.262	11.6232
	13.5589	11.6232
	13.5601	11.6232
	13.5601	11.6335
	13.5604	11.6336
	13.5679	11.6447
	13.5679	11.9461
	13.5679	11.9461
	13.5723	11.9461
	13.5727	11.9566
	13.5727	11.9681
	13.5727	11.9681
	13.883	11.9681
	13.8909	11.9681
	13.8958	12.2689
	13.9089	12.2689
	14.2046	12.2689
	14.2046	12.2689
	14.2059	12.269
	14.2059	12.269
	14.2062	12.2799
	14.2139	12.2916
	14.2139	12.2916
	14.2139	12.2916
	14.2139	12.5918
	14.2324	12.5918
	14.2324	12.5918
	14.5274	12.5918
	14.5287	12.5918
	14.529	12.5918
	14.537	12.5918
	14.537	12.5918
	14.537	12.6031
	14.5418	12.615
	14.5418	12.615
	14.8503	12.615
	14.8516	12.9147
	14.8519	12.9147
	14.8519	12.9147
	14.8519	12.9147
	14.8649	12.9147
	14.8653	12.9147
	14.8793	12.9147
	14.8793	12.9147
	15.1744	12.9147
	15.1831	12.9147
	15.1831	12.9261
	15.1831	12.9262
	15.1881	12.9385
	15.1885	12.9385
	15.4973	12.9385
	15.4973	13.2375
	15.4976	13.2375
	15.4976	13.2375
	15.5061	13.2376
	15.5061	13.2376
	15.5061	13.2376
	15.8187	13.2376
	15.8202	13.2492
	15.8202	13.2494
	15.8202	13.262
	15.8205	13.262
	15.8344	13.262
	15.8348	13.262
	15.8497	13.5604
	16.1575	13.5604
	16.1575	13.5604
	16.1575	13.5604
	16.1579	13.5604
	16.4659	13.5604
	16.4662	13.5604
	16.4662	13.5604
	16.4811	13.5604
	16.4966	13.5724
	16.7872	13.5725
	16.7887	13.5725
	16.7983	13.5854
	16.7983	13.5854
	16.7983	13.5854
	16.7983	13.8833
	16.8038	13.8833
	16.8043	13.8833
	17.112	13.8833
	17.127	13.8955
	17.1274	13.8955
	17.4345	13.9089
	17.4348	13.9089
	17.4506	13.9089
	17.7573	14.2061
	17.7573	14.2061
	17.7577	14.2061
	17.7577	14.2062
	17.7733	14.2062
	18.0802	14.2062
	18.0802	14.2062
	18.0802	14.2324
	18.0802	14.2324
	18.0964	14.2324
	18.0964	14.529
	18.4014	14.529
	18.4034	14.529
	18.4196	14.529
	18.4196	14.5418
	18.7263	14.5418
	18.7432	14.5418
	18.7432	14.5418
	18.7608	14.542
	19.0492	14.5558
	19.0659	14.5558
	19.0664	14.5558
	19.0664	14.8519
	19.372	14.8519
	19.372	14.8519
	19.3827	14.8519
	19.3827	14.8519
	19.389	14.8651
	19.6945	14.8651
	19.6949	14.8651
	19.7122	14.8793
		14.8793
		14.8793
		15.1747
		15.1748
		15.1748
		15.1748
		15.1881
		15.2027
		15.2027
		15.2027
		15.2027
		15.2027
		15.4976
		15.4976
		15.4976
		15.4976
		15.5262
		15.5262
		15.5262
		15.8205
		15.8205
		15.8205
		15.8205
		15.8205
		15.8344
		15.8344
		15.8346
		15.8497
		15.8497
		16.1434
		16.1434
		16.1576
		16.1576
		16.1731
		16.1731
		16.1731
		16.1731
		16.4662
		16.4662
		16.4662
		16.4662
		16.4662
		16.4807
		16.7891
		16.8201
		16.8201
		17.1119
		17.1119
		17.1119
		17.112
		17.112
		17.112
		17.1272
		17.1435
		17.1435
		17.4348
		17.4348
		17.4349
		17.4349
		17.4502
		17.467
		17.467
		17.7577
		17.7577
		17.7577
		17.7577
		17.7735
		17.7904
		18.0805
		18.0805
		18.0806
		18.0806
		18.0806
		18.0806
		18.0967
		18.1139
		18.1139
		18.1139
		18.4034
		18.4034
		18.4034
		18.4034
		18.4034
		18.4035
		18.4199
		18.4374
		18.4374
		18.4374
		18.4374
		18.7263
		18.7263
		18.7428
		18.743
		18.7608
		18.7608
		19.0491
		19.0492
		19.066
		19.066
		19.0662
		19.0843
		19.0843
		19.0843
		19.372
		19.372
		19.372
		19.372
		19.372
		19.372
		19.3721
		19.3721
		19.3891
		19.4078
		19.6948
		19.6948
		19.6949
		19.6949
		19.6949
		19.6949
		19.7125
		19.7312
		19.7312
