# Supplementary material for: Vinculin recruitment to α-catenin halts the differentiation and maturation of enterocyte progenitors to maintain homeostasis of the Drosophila intestine
Source: eLife. 2022 Oct 21;11:e72836. doi: 10.7554/eLife.72836 (PMC9586559; doi:10.7554/eLife.72836)
Supplement: Figure 5—source data 1. [file elife-72836-fig5-data1.xlsx]

## Sheet: Figure 5C
Figure 5C
	Differentiation index
	RFP+/GFP-cell ratio over number of total DAPI nuclei
	14 days
	Ctrl	#25965
	1.82768	28.8889
	4.20168	35.7466
	8.58726	35.8804
	1.08696	38.3178
	9.82659

## Sheet: Figure 5F
Figure 5F
	Differentiation index
	RFP+/GFP-cell ratio over number of total DAPI nuclei
	14 days
	Ctrl	#25965
	3.34572	12.8049
	3.1477	19.0157
	1.40056	0.699301
	1.59011	10.3245
	2.11082	7.39437
	0	3.97727
	4.33071	1.0101
	0	0
	0.831025	0.296296
	0.242718	2.10325
	0.21097	3.62438
		1.47679
		10
		0.863931
		0.868307

## Sheet: Figure 5-Supplement 1C
Figure 5-figure supplement 1C
	Proliferative index
	number of pH3+ cells per posterior midgut
	14 days
	Ctrl	vincRNAi #25965
	1	0
	0	0
	0	6
	0	0
	0	7
	0	0
	1	3
	0	3
	3	1
	5	1
	4	9
	3	9
	2	8
	0	4
	6	3
	4	13
	3	14
	5	2
	3	21
	5	13
	0	25
	4	21
	1	20
	1	13
	0	22
		12
		0
		15
		23

## Sheet: Figure 5-Supplement 1D
Figure 5-figure supplement 1D
	Enteroblast ratio
	Ratio of GFP+ cells over total numer of DAPI nuclei
	14 days
	Ctrl	vincRNAi #25965
	0.214634	0.318966
	0.124031	0.339869
	0.234597	0.281296
	0.260309	0.269231
	0.206235	0.324547
	0.183544	0.368085
	0.288217	0.27307
	0.411306	0.279904
	0.360465	0.269643
	0.461538	0.503958
	0.401681	0.357013
	0.255102	0.353774
	0.309381	0.5247
	0.212581	0.437895
	0.308365	0.638498
	0.320911	0.698758
		0.560799

## Sheet: Figure 5-figure Supplement 1E
Figure 5-figure Supplement 1E
	Cell density
	number of nuclei (DAPI+) / 10000 µm² area
	Ctrl	vinc #25965
	58	137
	65	160
	59	148
	57	118
	61	146
	54	108
	62	99
	75	118
	58	140
	104

## Sheet: Figure 5-Supplement 2
Figure 5-Supplement 2
	Cell density
	number of DAPI nuclei in 10000 μm² area
	14 days
	Ctrl	vincRNAi #25965
	0.214634	0.318966
	0.124031	0.339869
	0.234597	0.281296
	0.260309	0.269231
	0.206235	0.324547
	0.183544	0.368085
	0.288217	0.27307
	0.411306	0.279904
	0.360465	0.269643
	0.461538	0.503958
	0.401681	0.357013
	0.255102	0.353774
	0.309381	0.5247
	0.212581	0.437895
	0.308365	0.638498
	0.320911	0.698758
		0.560799
