# Supplementary material for: Vinculin recruitment to α-catenin halts the differentiation and maturation of enterocyte progenitors to maintain homeostasis of the Drosophila intestine
Source: eLife. 2022 Oct 21;11:e72836. doi: 10.7554/eLife.72836 (PMC9586559; doi:10.7554/eLife.72836)
Supplement: Figure 6—source data 1. [file elife-72836-fig6-data1.xlsx]

## Sheet: Figure 6B
Figure 6B
	Nuclear size
	DAPI nuclei area of GFP+ cells
	14 days
	esgts-GFP	vinc #25965	αcat #33430	αcat #38987
	50.4602	108.037	95.7449	85.0707
	48.8429	103.185	94.4511	74.0729
	36.8747	101.244	93.8042	71.8087
	36.2278	93.4807	90.893	69.5445
	35.9044	92.8338	89.2757	62.1048
	35.9044	89.9226	86.0411	62.1048
	35.5809	87.3349	84.7472	60.4875
	33.9636	86.3645	82.483	60.1641
	33.6401	84.4238	76.9841	60.1641
	31.6993	82.1595	76.6606	60.1641
	31.3759	81.8361	76.3372	58.5467
	31.3759	80.5422	74.3964	56.606
	31.0524	76.9841	73.426	55.6356
	30.082	76.6606	72.4556	52.7244
	29.7586	74.7199	70.8383	52.0775
	29.7586	74.3964	70.8383	51.754
	29.4351	74.3964	70.1914	51.754
	29.1116	74.0729	70.1914	51.1071
	29.1116	72.7791	67.9272	50.7836
	28.7882	72.1322	67.6037	49.8132
	28.4647	69.5445	66.9568	49.4898
	28.4647	67.2802	66.6333	49.1663
	28.1413	66.3098	66.3098	49.1663
	27.8178	63.3987	65.9864	47.8725
	27.1709	61.1344	65.9864	47.2255
	26.8474	60.1641	65.6629	47.2255
	26.5239	59.8406	65.6629	47.2255
	26.5239	59.8406	64.6925	46.5786
	26.5239	58.5467	63.3987	46.5786
	26.2005	58.2233	62.7518	46.5786
	26.2005	58.2233	62.1048	46.5786
	26.2005	57.2529	62.1048	46.5786
	26.2005	57.2529	62.1048	46.2552
	25.877	56.9294	61.7814	45.9317
	25.877	56.9294	60.4875	45.9317
	25.5535	55.959	59.1937	45.6082
	25.2301	55.959	58.5467	44.9613
	25.2301	54.6652	58.5467	44.9613
	25.2301	54.6652	58.2233	44.9613
	24.9066	54.3417	58.2233	44.6378
	24.9066	53.6948	57.5764	44.3144
	24.5832	53.3713	54.6652	44.3144
	24.5832	53.0479	54.6652	44.3144
	24.5832	52.7244	54.6652	43.6675
	24.5832	52.4009	54.0183	43.6675
	24.2597	52.4009	53.6948	42.6971
	24.2597	52.4009	53.6948	42.6971
	24.2597	52.0775	53.3713	42.3736
	23.9362	51.4306	52.7244	42.0501
	23.6128	51.4306	52.7244	42.0501
	23.6128	51.1071	52.7244	41.7267
	23.2893	50.7836	52.4009	41.4032
	23.2893	49.8132	52.4009	41.4032
	23.2893	49.8132	52.0775	41.4032
	23.2893	49.1663	51.754	40.7563
	22.9658	48.8429	51.754	40.7563
	22.6424	48.8429	51.4306	40.4328
	22.6424	48.1959	51.4306	40.4328
	22.6424	48.1959	51.1071	40.1094
	22.6424	47.8725	51.1071	40.1094
	22.6424	47.8725	51.1071	40.1094
	22.3189	47.8725	50.7836	39.7859
	21.9955	46.9021	50.4602	39.4624
	21.9955	46.9021	50.4602	39.4624
	21.9955	46.9021	50.4602	39.139
	21.9955	45.2848	50.4602	39.139
	21.9955	44.9613	50.1367	38.8155
	21.9955	44.9613	50.1367	38.4921
	21.9955	44.6378	49.8132	38.4921
	21.672	43.9909	49.8132	38.4921
	21.672	43.9909	49.4898	37.1982
	21.672	43.9909	49.4898	36.8747
	21.3485	43.0205	49.4898	36.8747
	21.0251	43.0205	49.1663	36.8747
	21.0251	42.6971	49.1663	36.5513
	21.0251	42.0501	49.1663	36.2278
	21.0251	41.7267	48.8429	35.9044
	21.0251	41.4032	48.5194	35.9044
	20.7016	41.4032	48.5194	35.9044
	20.3781	41.0798	48.1959	35.5809
	20.3781	40.7563	48.1959	35.5809
	20.3781	40.7563	48.1959	35.2574
	20.3781	40.7563	48.1959	35.2574
	20.3781	40.1094	47.8725	35.2574
	20.3781	39.139	47.8725	34.934
	20.0547	38.8155	47.8725	34.6105
	20.0547	38.8155	47.549	34.287
	20.0547	38.1686	47.549	34.287
	20.0547	37.8451	47.2255	34.287
	20.0547	37.8451	47.2255	33.9636
	20.0547	37.1982	47.2255	33.6401
	20.0547	37.1982	46.9021	33.6401
	20.0547	36.2278	46.9021	33.3167
	19.7312	36.2278	46.9021	33.3167
	19.7312	36.2278	46.5786	32.9932
	19.7312	35.9044	46.5786	32.9932
	19.7312	35.9044	46.2552	32.6697
	19.7312	35.5809	46.2552	32.6697
	19.4078	35.2574	45.9317	32.6697
	19.4078	34.934	45.9317	32.6697
	19.4078	34.6105	45.9317	32.6697
	19.0843	34.287	45.6082	32.6697
	19.0843	33.9636	45.6082	32.6697
	19.0843	33.9636	45.6082	32.3463
	19.0843	33.9636	45.2848	32.0228
	19.0843	33.3167	45.2848	31.3759
	19.0843	32.3463	45.2848	31.3759
	18.7608	31.6993	45.2848	31.3759
	18.7608	31.3759	45.2848	31.0524
	18.7608	31.3759	44.9613	30.729
	18.7608	30.082	44.9613	30.729
	18.7608	29.7586	44.9613	30.729
	18.7608	29.7586	44.6378	30.4055
	18.4374	29.4351	44.6378	30.4055
	18.4374	28.7882	44.6378	29.7586
	18.4374	28.4647	44.6378	29.7586
	18.4374	28.1413	44.6378	29.4351
	18.4374	28.1413	44.3144	29.4351
	18.4374	27.8178	44.3144	29.1116
	18.4374	27.1709	44.3144	29.1116
	18.1139	26.8474	44.3144	28.7882
	18.1139	26.5239	44.3144	28.7882
	18.1139	25.5535	44.3144	28.4647
	18.1139	24.9066	43.9909	28.4647
	18.1139	24.9066	43.6675	28.4647
	18.1139	24.2597	43.6675	28.4647
	18.1139	24.2597	43.6675	28.1413
	18.1139	24.2597	43.6675	28.1413
	18.1139	23.9362	43.344	28.1413
	18.1139	23.9362	43.344	28.1413
	17.7904	23.6128	43.344	27.8178
	17.7904	23.2893	43.0205	27.4943
	17.7904	23.2893	43.0205	27.4943
	17.7904	23.2893	43.0205	27.1709
	17.7904	22.6424	43.0205	27.1709
	17.7904	22.3189	43.0205	26.8474
	17.467	21.9955	42.6971	26.5239
	17.467	21.3485	42.6971	26.5239
	17.467	21.3485	42.6971	26.2005
	17.467	21.0251	42.6971	26.2005
	17.467	20.7016	42.3736	26.2005
	17.1435	20.7016	42.3736	25.877
	17.1435	20.7016	42.3736	25.877
	17.1435	20.3781	42.0501	25.877
	17.1435	20.3781	42.0501	25.877
	17.1435	20.0547	42.0501	25.2301
	17.1435	19.7312	41.7267	25.2301
	17.1435	19.7312	41.4032	24.9066
	17.1435	19.0843	41.4032	24.9066
	17.1435	19.0843	41.0798	24.9066
	16.8201	19.0843	41.0798	24.9066
	16.8201	19.0843	40.7563	24.2597
	16.8201	18.7608	40.7563	24.2597
	16.8201	18.7608	40.7563	24.2597
	16.8201	18.7608	40.7563	24.2597
	16.8201	18.1139	40.7563	23.9362
	16.8201	18.1139	40.4328	23.9362
	16.8201	17.7904	40.4328	23.9362
	16.8201	17.7904	40.4328	23.9362
	16.8201	17.7904	40.1094	23.9362
	16.8201	17.467	40.1094	23.9362
	16.8201	16.4966	40.1094	23.6128
	16.4966	16.4966	40.1094	23.6128
	16.4966	16.1731	39.7859	23.6128
	16.4966	16.1731	39.7859	23.6128
	16.4966	15.8497	39.7859	23.6128
	16.4966	15.8497	39.7859	23.2893
	16.4966	15.8497	39.4624	22.9658
	16.4966	15.8497	39.4624	22.9658
	16.4966	15.8497	39.4624	22.9658
	16.4966	15.8497	39.4624	22.6424
	16.4966	15.8497	39.4624	22.6424
	16.4966	15.5262	39.4624	22.6424
	16.4966	15.5262	39.4624	22.3189
	16.4966	15.2027	39.4624	22.3189
	16.4966	15.2027	39.139	22.3189
	16.4966	15.2027	39.139	21.9955
	16.1731	14.8793	39.139	21.9955
	16.1731	14.8793	39.139	21.672
	16.1731	14.8793	38.8155	21.672
	16.1731	14.5558	38.8155	21.672
	16.1731	14.5558	38.8155	21.3485
	16.1731	14.5558	38.8155	21.3485
	16.1731	14.2324	38.4921	21.0251
	16.1731	14.2324	38.1686	21.0251
	16.1731	14.2324	37.8451	20.7016
	15.8497	14.2324	37.8451	20.7016
	15.8497	14.2324	37.8451	20.7016
	15.8497	13.9089	37.8451	20.7016
	15.8497	13.9089	37.5217	20.3781
	15.8497	13.9089	37.5217	20.3781
	15.8497	13.5854	37.5217	20.3781
	15.8497	13.5854	37.5217	20.0547
	15.8497	13.5854	37.5217	20.0547
	15.8497	13.5854	37.1982	20.0547
	15.8497	13.262	37.1982	20.0547
	15.8497	13.262	37.1982	19.7312
	15.8497	13.262	37.1982	19.7312
	15.8497	13.262	37.1982	19.7312
	15.8497	12.9385	37.1982	19.7312
	15.5262	12.9385	37.1982	19.4078
	15.5262	12.9385	36.8747	19.4078
	15.5262	12.9385	36.8747	19.4078
	15.5262	12.9385	36.8747	19.4078
	15.5262	12.615	36.8747	19.4078
	15.5262	12.615	36.8747	19.0843
	15.5262	12.615	36.8747	19.0843
	15.5262	12.2916	36.8747	18.7608
	15.5262	11.9681	36.5513	18.7608
	15.5262	11.9681	36.5513	18.7608
	15.5262	11.3212	36.5513	18.7608
	15.5262	11.3212	36.5513	18.7608
	15.5262	11.3212	36.5513	18.7608
	15.2027	11.3212	36.2278	18.7608
	15.2027	10.9977	36.2278	18.7608
	15.2027	10.9977	36.2278	18.4374
	15.2027	10.9977	36.2278	18.4374
	15.2027	10.9977	36.2278	18.4374
	15.2027	10.9977	35.9044	18.4374
	15.2027	10.9977	35.9044	18.4374
	14.8793	10.9977	35.9044	18.1139
	14.8793	10.6743	35.5809	18.1139
	14.8793	10.6743	35.5809	17.7904
	14.8793	10.6743	35.5809	17.7904
	14.8793	10.6743	35.5809	17.7904
	14.8793	10.6743	35.5809	17.7904
	14.8793	10.6743	35.5809	17.467
	14.8793	10.3508	35.5809	17.467
	14.8793	10.3508	35.2574	17.1435
	14.8793	10.0273	35.2574	17.1435
	14.8793	10.0273	35.2574	17.1435
	14.8793	10.0273	35.2574	17.1435
	14.8793	9.7039	35.2574	17.1435
	14.8793	9.7039	34.934	17.1435
	14.5558	9.3804	34.934	16.8201
	14.5558	9.3804	34.934	16.8201
	14.5558	9.3804	34.6105	16.8201
	14.5558	9.057	34.6105	16.4966
	14.5558	9.057	34.287	16.4966
	14.5558	9.057	34.287	16.4966
	14.5558	8.7335	34.287	16.1731
	14.2324	8.7335	34.287	16.1731
	14.2324	8.7335	34.287	16.1731
	14.2324	8.41	34.287	15.8497
	14.2324	8.41	34.287	15.8497
	14.2324	8.41	33.9636	15.8497
	14.2324	8.0866	33.9636	15.8497
	14.2324	7.7631	33.9636	15.5262
	14.2324	7.7631	33.9636	15.2027
	13.9089	7.7631	33.9636	15.2027
	13.9089	7.7631	33.6401	15.2027
	13.9089	7.7631	33.6401	15.2027
	13.9089	7.7631	33.6401	15.2027
	13.9089	7.4396	33.6401	15.2027
	13.9089	7.4396	33.6401	15.2027
	13.9089	7.4396	33.6401	14.8793
	13.9089	7.1162	33.3167	14.8793
	13.9089	6.7927	33.3167	14.8793
	13.9089	6.7927	33.3167	14.5558
	13.9089	6.7927	32.9932	14.5558
	13.9089	6.7927	32.9932	14.5558
	13.9089	6.1458	32.9932	14.5558
	13.9089	6.1458	32.6697	14.5558
	13.9089	6.1458	32.3463	14.2324
	13.5854	6.1458	32.3463	14.2324
	13.5854	6.1458	32.3463	14.2324
	13.5854	6.1458	32.3463	14.2324
	13.5854		32.3463	14.2324
	13.5854		32.3463	14.2324
	13.5854		32.0228	14.2324
	13.5854		32.0228	14.2324
	13.5854		32.0228	14.2324
	13.5854		32.0228	14.2324
	13.5854		32.0228	14.2324
	13.5854		31.6993	13.9089
	13.5854		31.6993	13.5854
	13.5854		31.6993	13.5854
	13.5854		31.6993	13.5854
	13.262		31.6993	13.5854
	13.262		31.3759	13.5854
	13.262		31.0524	13.5854
	13.262		31.0524	13.5854
	13.262		31.0524	13.5854
	13.262		31.0524	13.262
	13.262		31.0524	13.262
	13.262		30.729	13.262
	13.262		30.729	13.262
	12.9385		30.729	13.262
	12.9385		30.729	13.262
	12.9385		30.729	13.262
	12.9385		30.4055	13.262
	12.9385		30.4055	12.9385
	12.9385		30.082	12.9385
	12.9385		30.082	12.9385
	12.9385		30.082	12.9385
	12.9385		30.082	12.9385
	12.9385		29.4351	12.9385
	12.9385		29.1116	12.9385
	12.9385		29.1116	12.9385
	12.9385		28.7882	12.9385
	12.9385		28.7882	12.9385
	12.9385		28.7882	12.9385
	12.9385		28.4647	12.9385
	12.615		28.4647	12.615
	12.615		28.4647	12.615
	12.615		28.4647	12.615
	12.615		28.4647	12.615
	12.615		28.4647	12.615
	12.615		28.1413	12.615
	12.615		28.1413	12.615
	12.615		28.1413	12.615
	12.615		28.1413	12.615
	12.615		28.1413	12.615
	12.615		27.8178	12.2916
	12.615		27.8178	12.2916
	12.2916		27.8178	12.2916
	12.2916		27.8178	12.2916
	12.2916		27.4943	12.2916
	12.2916		27.4943	12.2916
	12.2916		27.4943	12.2916
	12.2916		27.1709	12.2916
	12.2916		27.1709	12.2916
	12.2916		27.1709	11.9681
	12.2916		27.1709	11.9681
	12.2916		26.8474	11.9681
	12.2916		26.8474	11.9681
	11.9681		26.8474	11.9681
	11.9681		26.5239	11.9681
	11.9681		26.5239	11.9681
	11.9681		26.5239	11.9681
	11.9681		26.2005	11.9681
	11.9681		26.2005	11.6447
	11.9681		26.2005	11.6447
	11.9681		26.2005	11.6447
	11.9681		26.2005	11.6447
	11.9681		26.2005	11.6447
	11.9681		26.2005	11.6447
	11.9681		25.877	11.6447
	11.6447		25.5535	11.3212
	11.6447		25.5535	11.3212
	11.6447		25.2301	11.3212
	11.6447		25.2301	11.3212
	11.6447		25.2301	11.3212
	11.6447		25.2301	11.3212
	11.6447		25.2301	10.9977
	11.6447		24.9066	10.9977
	11.6447		24.9066	10.9977
	11.6447		24.9066	10.9977
	11.3212		24.9066	10.9977
	11.3212		24.9066	10.9977
	11.3212		24.9066	10.9977
	11.3212		24.5832	10.6743
	11.3212		24.5832	10.6743
	11.3212		24.5832	10.6743
	11.3212		24.2597	10.6743
	11.3212		24.2597	10.6743
	11.3212		24.2597	10.6743
	11.3212		24.2597	10.6743
	11.3212		23.9362	10.3508
	11.3212		23.9362	10.3508
	11.3212		23.9362	10.3508
	11.3212		23.6128	10.3508
	10.9977		23.6128	10.3508
	10.9977		23.6128	10.3508
	10.9977		23.6128	10.3508
	10.9977		23.6128	10.3508
	10.9977		23.6128	10.3508
	10.9977		23.2893	10.3508
	10.9977		23.2893	10.0273
	10.9977		23.2893	10.0273
	10.9977		22.9658	10.0273
	10.6743		22.9658	10.0273
	10.6743		22.6424	10.0273
	10.6743		22.6424	10.0273
	10.6743		22.6424	9.7039
	10.6743		22.6424	9.7039
	10.6743		22.3189	9.7039
	10.6743		22.3189	9.3804
	10.6743		22.3189	9.3804
	10.6743		21.9955	9.3804
	10.6743		21.9955	9.3804
	10.6743		21.9955	9.057
	10.3508		21.9955	9.057
	10.3508		21.9955	9.057
	10.3508		21.9955	8.7335
	10.3508		21.9955	8.7335
	10.3508		21.9955	8.7335
	10.3508		21.9955	8.7335
	10.3508		21.9955	8.7335
	10.3508		21.672	8.7335
	10.3508		21.672	8.41
	10.3508		21.672	8.41
	10.3508		21.672	8.41
	10.3508		21.672	8.41
	10.0273		21.672	8.0866
	10.0273		21.672	8.0866
	10.0273		21.3485	8.0866
	10.0273		21.3485	8.0866
	10.0273		21.3485	8.0866
	10.0273		21.3485	8.0866
	10.0273		21.0251	7.7631
	10.0273		21.0251	7.7631
	10.0273		21.0251	7.7631
	10.0273		21.0251	7.7631
	10.0273		21.0251	7.4396
	10.0273		20.7016	7.4396
	10.0273		20.7016	7.4396
	10.0273		20.7016	7.4396
	10.0273		20.7016	7.4396
	9.7039		20.7016	7.1162
	9.7039		20.7016	6.7927
	9.7039		20.7016	6.7927
	9.7039		20.7016	6.7927
	9.7039		20.3781	6.7927
	9.7039		20.3781	6.7927
	9.7039		20.3781	6.4693
	9.7039		20.0547	6.4693
	9.7039		20.0547	6.4693
	9.7039		20.0547	6.1458
	9.7039		20.0547	6.1458
	9.3804		20.0547	6.1458
	9.3804		19.7312
	9.3804		19.7312
	9.3804		19.7312
	9.3804		19.7312
	9.3804		19.7312
	9.3804		19.7312
	9.3804		19.7312
	9.3804		19.7312
	9.3804		19.7312
	9.057		19.4078
	9.057		19.4078
	9.057		19.4078
	9.057		19.4078
	9.057		19.4078
	9.057		19.4078
	9.057		19.0843
	9.057		19.0843
	9.057		19.0843
	9.057		19.0843
	9.057		19.0843
	9.057		19.0843
	9.057		19.0843
	9.057		19.0843
	9.057		18.7608
	9.057		18.7608
	8.7335		18.7608
	8.7335		18.7608
	8.7335		18.7608
	8.7335		18.4374
	8.7335		18.4374
	8.7335		18.4374
	8.7335		18.4374
	8.7335		18.4374
	8.7335		18.4374
	8.7335		18.4374
	8.7335		18.4374
	8.7335		18.4374
	8.7335		18.1139
	8.41		18.1139
	8.41		18.1139
	8.41		18.1139
	8.41		18.1139
	8.41		18.1139
	8.41		18.1139
	8.41		18.1139
	8.41		18.1139
	8.41		18.1139
	8.41		18.1139
	8.0866		17.7904
	8.0866		17.7904
	8.0866		17.7904
	8.0866		17.7904
	7.7631		17.7904
	7.4396		17.467
	7.4396		17.467
	7.4396		17.467
	7.4396		17.467
	7.4396		17.467
	7.4396		17.467
	7.4396		17.467
	7.4396		17.467
	7.4396		17.467
	7.1162		17.467
	7.1162		17.467
	7.1162		17.467
	7.1162		17.1435
	7.1162		17.1435
	6.7927		17.1435
	6.7927		17.1435
	6.7927		17.1435
	6.7927		17.1435
	6.4693		17.1435
	6.1458		17.1435
			17.1435
			17.1435
			16.8201
			16.8201
			16.8201
			16.8201
			16.8201
			16.8201
			16.8201
			16.8201
			16.8201
			16.8201
			16.8201
			16.8201
			16.4966
			16.4966
			16.4966
			16.4966
			16.4966
			16.4966
			16.1731
			16.1731
			16.1731
			16.1731
			16.1731
			16.1731
			15.8497
			15.8497
			15.8497
			15.8497
			15.8497
			15.8497
			15.8497
			15.8497
			15.8497
			15.5262
			15.5262
			15.5262
			15.5262
			15.5262
			15.5262
			15.5262
			15.5262
			15.5262
			15.5262
			15.5262
			15.2027
			15.2027
			15.2027
			15.2027
			15.2027
			15.2027
			15.2027
			15.2027
			14.8793
			14.8793
			14.8793
			14.8793
			14.8793
			14.8793
			14.8793
			14.8793
			14.8793
			14.8793
			14.8793
			14.8793
			14.5558
			14.5558
			14.5558
			14.5558
			14.5558
			14.5558
			14.5558
			14.5558
			14.5558
			14.2324
			14.2324
			14.2324
			14.2324
			14.2324
			14.2324
			13.9089
			13.9089
			13.9089
			13.9089
			13.9089
			13.9089
			13.9089
			13.5854
			13.5854
			13.5854
			13.5854
			13.5854
			13.5854
			13.5854
			13.5854
			13.5854
			13.5854
			13.5854
			13.5854
			13.5854
			13.5854
			13.5854
			13.262
			13.262
			13.262
			13.262
			13.262
			13.262
			13.262
			13.262
			12.9385
			12.9385
			12.9385
			12.9385
			12.9385
			12.9385
			12.9385
			12.9385
			12.9385
			12.9385
			12.9385
			12.9385
			12.9385
			12.9385
			12.9385
			12.9385
			12.9385
			12.615
			12.615
			12.615
			12.615
			12.615
			12.615
			12.615
			12.615
			12.615
			12.615
			12.615
			12.615
			12.615
			12.615
			12.615
			12.615
			12.2916
			12.2916
			12.2916
			12.2916
			12.2916
			12.2916
			12.2916
			12.2916
			11.9681
			11.9681
			11.9681
			11.9681
			11.9681
			11.9681
			11.9681
			11.9681
			11.9681
			11.9681
			11.9681
			11.6447
			11.6447
			11.6447
			11.6447
			11.6447
			11.6447
			11.6447
			11.3212
			11.3212
			11.3212
			11.3212
			11.3212
			11.3212
			11.3212
			11.3212
			11.3212
			11.3212
			11.3212
			11.3212
			10.9977
			10.9977
			10.9977
			10.9977
			10.9977
			10.9977
			10.6743
			10.6743
			10.6743
			10.6743
			10.6743
			10.6743
			10.6743
			10.6743
			10.3508
			10.3508
			10.3508
			10.3508
			10.3508
			10.3508
			10.3508
			10.3508
			10.3508
			10.3508
			10.3508
			10.0273
			10.0273
			10.0273
			10.0273
			10.0273
			10.0273
			10.0273
			10.0273
			10.0273
			10.0273
			10.0273
			10.0273
			9.7039
			9.7039
			9.7039
			9.7039
			9.3804
			9.3804
			9.3804
			9.3804
			9.3804
			9.3804
			9.3804
			9.3804
			9.3804
			9.3804
			9.057
			9.057
			9.057
			9.057
			9.057
			9.057
			9.057
			9.057
			8.7335
			8.7335
			8.7335
			8.7335
			8.7335
			8.7335
			8.7335
			8.7335
			8.7335
			8.7335
			8.7335
			8.41
			8.41
			8.41
			8.41
			8.41
			8.41
			8.41
			8.41
			8.41
			8.41
			8.0866
			8.0866
			8.0866
			8.0866
			8.0866
			8.0866
			8.0866
			8.0866
			8.0866
			8.0866
			8.0866
			8.0866
			8.0866
			8.0866
			8.0866
			7.7631
			7.7631
			7.7631
			7.7631
			7.7631
			7.7631
			7.7631
			7.7631
			7.7631
			7.7631
			7.7631
			7.4396
			7.4396
			7.4396
			7.4396
			7.4396
			7.4396
			7.4396
			7.4396
			7.4396
			7.4396
			7.4396
			7.4396
			7.4396
			7.4396
			7.4396
			7.4396
			7.1162
			7.1162
			7.1162
			7.1162
			7.1162
			7.1162
			7.1162
			7.1162
			7.1162
			7.1162
			7.1162
			7.1162
			7.1162
			6.7927
			6.7927
			6.7927
			6.7927
			6.7927
			6.7927
			6.7927
			6.7927
			6.4693
			6.4693
			6.4693
			6.4693
			6.4693
			6.1458
			6.1458
			6.1458
			6.1458
			6.1458
			6.1458
			6.1458
			6.1458

## Sheet: Figure 6F
Figure 6F
	Differentiation index
	RFP+/GFP- cell ratio over total number of DAPI nuclei
		αcatRNAi #33430
	Ctrl	αcatFL	αcatΔM1a	αcatΔM1b	αcatΔM2
	17.1429	0.759494	36.4532	28.0397	14.3911
	2.73038	2.61905	31.5673	9.63542	19.8113
	2.08877	21.4286	42.2535	20.1493	25
	4.89691	0.692042	34.9328	15.534	2.5
	35.5091	7.8341	45.9725	29.6552	18.8679
	7.95756	0.401606	43.5318	25.0554	5.35714
	2.67176	1.9802	41.806	2.55102	1.0989
	0.803213	0.348432	42.6621	17.4684
	0.341297	0.367647	17.1216	12.7182
	23.2295	5.44554	40.2778

## Sheet: Figure 6G
Figure 6G
	Retention index
	ratio of RFP-/GFP- cells over total number of DAPI nuclei
		αcatRNAi #33430
	Ctrl	αcatFL	αcatΔM1a	αcatΔM1b	αcatΔM2
	43.6364	62.5316	27.2953	44.4169	49.8155
	58.3618	64.5238	28.6458	56.5104	53.1447
	60.0522	51.2987	19.403	58.209	43.2796
	49.7423	65.7439	33.2524	55.8252	63.8889
	34.9869	56.9124	13.5632	44.8276	61.9497
	55.1724	60.6426	26.6075	30.5987	63.7755
	67.1756	65.3465	17.3469	60.4592	59.3407
	60.6426	61.6725	18.7342	44.557
	66.8942	64.3382	55.611	51.6209
	40.7932	59.6535

## Sheet: Figure 6- Supplement 1C
Figure 6- figure supplement 1C
	Vinculin intensity across the membrane
	vinculin-GFP intensity between progenitors
	Distance	Ctrl
	0	8.553	15.6043	20.7867		15.2335	12.8557		29.8455			21.4676		8.1312	24.6373	9.1326	10.7908			13.5961			9.655		14.3113	18.8678		12.4208	10.1317		10.5005	5.5599		11.7076	6.8696					12.0284			15.8146	13.1948		11.8895	5.13342	8.0174
	0.120367	9.6598	14.0455	22.7207		16.7331	13.8206		28.0753			24.6357		8.7171	22.5228	12.9933	10.9609		9.6922	13.2029		9.7501	10.9828		14.7134	18.57		11.9671	11.3846		8.1661	7.2126		12.2534	9.3491					13.3183			14.4571	14.0916		12.533	4.65236	9.1788
	0.240735	10.0588	16.6191	25.301		15.9046	13.8597		27.5638			23.422	13.2829	12.8952	24.7899	9.0775	10.9386		11.2366	12.0835		11.282	10.268	9.5717	14.0828	17.0496		11.6308	11.238		9.8628	6.9759	12.1751	13.0307	10.5333					12.7552			17.3343	11.3392	12.0604	13.4835	6.02599	6.6838
	0.361103	10.2706	15.4159	25.2243	11.8234	18.0339	13.9487		28.0897			20.8484	14.4969	10.8292	25.3564	12.9694	13.7348		14.1911	12.2909		8.0329	12.3308	9.664	14.7073	15.5634		12.007	11.4279		11.5781	8.6214	10.3254	16.4122	11.7544					13.7965			12.7556	13.8906	11.2843	13.5362	6.09506	8.8469
	0.481471	12.1551	20.4632	24.9369	13.0588	21.2077	12.6032		23.1939			18.7861	14.4465	9.6262	26.2395	13.216	12.8291		11.0875	13.6446		9.4569	12.6854	9.5114	18.232	17.9208		12.1619	15.2975		11.8335	10.2486	8.8965	17.1915	10.3679	7.0002		8.4094		12.259			13.8185	14.1873	11.0551	12.996	5.24844	8.563
	0.601839	12.6258	19.9473	23.266	11.4802	22.5542	14.8525		29.0658	17.1511	10.9975	15.645	15.4921	9.9909	25.945	8.9299	12.4041	21.2028	11.8051	14.3078		10.959	15.5315	10.8382	15.9912	20.7125	17.1199	12.0845	12.2182		13.0871	11.5463	10.7153	15.2517	9.5309	6.7152		11.6182		13.4799			13.3661	13.976	8.4106	12.1919	7.23572	11.1074
	0.722206	14.9887	21.9785	23.8099	11.9586	20.7889	15.0301	7.3068	26.6362	16.6484	10.0771	18.1362	14.4057	10.6516	25.2212	9.0868	12.2962	21.1996	13.8453	14.4192	9.5179	9.6943	14.5305	7.9149	18.76	22.1837	17.2686	8.8778	14.4086	14.2942	14.3636	9.7552	10.5664	16.3501	12.401	7.4422		8.8286		10.9443	9.9799		14.8493	14.9557	9.2949	11.5002	7.23022	11.3455	9.8732
	0.842574	14.4222	21.4567	27.2216	11.7197	21.6485	16.093	9.0064	22.1888	14.4315	10.9044	19.5817	17.0504	11.4937	29.7951	10.5721	12.4381	20.6828	15.2131	13.7659	10.2706	7.0797	14.7754	9.3146	18.2349	26.2012	12.5471	11.4035	13.4129	11.7411	12.8508	10.5082	9.28	12.6998	13.6518	8.09		8.9858		12.8067	8.268	5.7845	14.4519	13.4542	8.4757	13.1426	6.40593	9.8191	8.141
	0.962942	16.8801	19.0161	32.3234	12.435	18.983	16.1322	9.5964	24.1753	15.7899	12.1043	23.0806	13.2521	10.9072	32.3521	11.2024	12.6798	20.6216	18.1306	13.4738	11.085	7.9755	15.9153	9.9688	16.9539	27.6751	10.4082	10.1722	12.0539	10.5935	14.5198	10.1462	10.4114	14.1908	15.427	7.6237		8.6603		11.4822	8.073	6.8956	19.7435	15.6113	11.1422	14.9149	4.98256	10.6555	12.6577
	1.08331	19.673	20.3785	29.0471	10.2089	20.2585	14.9578	8.5097	22.8099	14.8128	12.8841	24.0722	14.0769	13.7939	26.8033	12.2372	14.3848	22.3222	16.5504	11.5636	11.5283	8.5782	14.5921	11.628	18.5936	25.6183	15.0401	13.209	12.7593	12.129	16.0548	7.5497	12.4336	13.9279	16.3173	6.9998	11.6079	8.8615	10.9744	13.4728	8.123	7.4976	20.1694	12.5299	10.5411	16.0181	5.37596	8.3785	11.2847
	1.20368	17.0881	21.7192	23.7353	11.5741	25.6636	16.9674	7.7104	23.9111	15.4174	11.8745	25.1873	14.2826	13.4966	30.1102	11.6029	16.6258	22.147	17.1089	14.2615	9.4164	10.673	14.6577	9.2776	16.5492	24.6811	14.5825	15.5006	15.5283	11.775	13.8355	10.8292	12.8269	15.8664	19.4877	6.5547	11.1819	9.5851	10.1878	13.5383	11.4252	11.2908	18.3907	10.8375	10.3769	14.7314	7.87909	8.3366	10.1941
	1.32404	16.792	28.331	23.037	18.4737	23.1824	19.1982	8.179	24.3607	10.7665	12.2455	23.7301	15.2698	13.5632	29.8332	11.8674	18.9819	20.7957	17.8323	14.6457	8.1533	11.6299	16.9715	9.0909	17.517	24.7913	13.4687	14.8042	16.1392	11.3401	17.4666	13.9279	11.6586	19.3772	22.1405	7.2786	8.9053	10.0312	10.6722	15.1423	10.2706	8.5088	18.1453	13.2736	11.7664	13.4173	6.27324	11.811	10.9475
	1.44441	16.2453	27.0322	32.2353	16.9708	27.4206	16.2499	9.9084	24.5879	12.1918	13.0583	22.0308	12.1326	15.2513	30.7003	11.8014	17.0858	20.7716	17.8352	14.5843	10.6748	11.4541	16.3124	10.5723	20.7909	22.6883	13.8979	15.1695	12.9154	11.6991	21.1147	12.7678	12.3382	17.0994	23.2217	8.7205	9.132	7.6783	9.2226	14.7075	11.8501	11.1865	17.8093	13.6605	15.8046	12.9411	6.48181	11.2661	10.3556
	1.56478	17.516	26.728	36.7374	16.7177	27.9238	18.1558	11.3784	25.3185	13.9312	13.3214	22.8052	13.2192	14.0398	31.5033	11.6712	21.2266	22.9863	18.0128	14.1022	10.6864	12.505	15.8083	12.2295	25.6304	25.0053	15.9218	17.1695	13.9111	14.2465	24.3543	13.3689	13.135	18.2315	22.5929	8.3665	8.4407	11.6144	10.7654	13.6034	10.6778	11.7634	18.5312	12.5271	16.0542	11.086	7.53516	8.2148	9.9497
	1.68515	16.9634	23.1276	44.2867	20.87	35.4824	18.108	13.0048	28.8662	13.1806	15.9191	27.2676	16.4532	14.8899	31.7676	12.4301	24.217	23.9113	27.128	13.39	13.1566	14.4802	18.9177	11.7425	26.1662	28.4488	15.3086	19.9709	14.9237	15.4837	26.3416	10.8606	15.2004	17.8719	26.8318	9.8848	8.939	10.0702	13.0219	14.8005	10.8966	14.8595	18.0637	10.8951	11.4784	12.1522	12.1102	11.5145	12.0457
	1.80552	18.9043	29.1099	44.3318	22.8104	36.9304	20.9195	14.2554	37.3795	14.2218	19.2396	31.4118	18.8387	18.2165	37.4211	12.5898	27.3033	25.2201	37.917	11.2486	12.0704	15.2257	21.2148	13.5357	25.7061	25.791	15.2927	23.2795	18.2445	13.0274	28.993	11.9368	16.7312	18.4312	39.9684	11.1818	9.966	11.1608	12.689	13.0128	12.2169	15.9011	17.6629	11.4706	13.3928	13.6717	7.65042	12.8221	12.6672
	1.92588	31.6621	41.9754	46.3377	25.0813	40.9956	24.9346	15.4861	40.6353	14.2646	22.524	37.3636	22.1244	24.2997	49.8071	14.0414	33.9617	25.1414	41.9892	16.6764	11.9187	15.9478	21.7621	14.2973	32.2266	29.4945	14.8498	26.0413	19.9183	18.3087	30.0956	18.1463	18.1788	21.3585	59.4957	10.8885	10.3189	14.0872	14.7541	15.4887	14.9565	16.1625	19.8019	10.8797	15.4222	15.6311	9.09632	15.7487	13.7103
	2.04625	40.5019	67.7438	50.3703	35.0217	41.9193	24.6699	24.1675	43.1425	16.1489	38.2176	38.9243	23.927	30.7495	58.1997	18.1683	36.456	25.4407	58.5891	18.3232	11.6898	21.0571	26.2861	19.5285	42.2862	39.6353	16.211	28.7192	22.1714	19.7325	27.4969	17.6492	20.16	18.7393	81.5503	13.2929	14.6707	16.7283	13.849	14.2316	22.0597	17.6575	21.3997	14.5872	17.6654	22.6547	10.4234	19.5191	14.5562
	2.16662	58.4065	99.1432	58.737	55.4283	42.7956	27.9883	38.0951	48.6011	21.4656	58.4672	43.7303	27.3956	34.9439	83.3511	22.3847	46.3333	26.8754	64.317	24.7054	16.4745	22.8149	26.0389	26.3982	42.4158	47.8676	20.2718	24.8497	27.8915	28.0509	29.1427	21.8193	20.2139	21.6512	104.963	18.5222	17.3537	21.2492	16.2034	15.0121	22.7637	19.8793	26.3056	19.2823	18.2071	29.6407	9.03882	28.3297	18.4675
	2.28699	62.1553	133.959	69.0826	55.9817	44.7511	28.0723	46.5107	50.8383	31.8133	72.6363	47.557	33.0869	35.0271	105.292	24.2012	55.3451	30.2069	65.6388	24.796	21.424	26.9615	28.7953	31.2552	45.7968	53.6315	25.1474	29.3142	25.6531	44.3283	31.7396	24.9952	20.8858	25.1493	112.926	22.0615	19.3692	22.5011	19.9097	17.8621	26.6424	20.7555	29.1794	23.9809	19.1654	33.6269	13.1897	38.5821	20.982
	2.40736	45.4596	106.557	66.6103	42.1522	41.0238	26.0667	34.63	48.8269	25.9807	63.472	38.9389	32.2248	30.9105	95.0697	22.522	50.4802	27.0872	47.2304	18.2513	20.4368	22.5423	24.9545	24.5151	45.0799	55.5282	21.7768	29.133	25.5659	43.2528	30.4526	20.2086	19.759	23.9178	98.0551	18.8543	17.0568	21.9325	16.0409	13.2757	22.6664	18.1822	21.8816	19.9951	15.9989	25.1778	11.183	28.1133	16.7797
	2.52772	24.5129	66.0504	47.6657	35.3004	39.4737	28.4587	26.8444	47.05	27.7101	39.9103	33.9875	22.9724	23.9571	64.4481	17.8448	39.6354	26.1662	33.853	11.7121	17.9355	18.357	24.742	15.4388	45.2098	46.8671	21.861	25.8713	25.3812	38.6457	30.1876	18.9362	19.2808	24.2164	87.0369	14.007	12.419	16.9131	14.758	15.2719	22.8664	14.2433	17.4881	17.7938	16.285	16.4281	9.45255	18.6159	20.0708
	2.64809	15.7538	52.6739	36.7639	23.6474	34.8813	20.8453	23.9712	38.1834	22.3584	29.1274	32.3962	20.4505	26.2309	49.8969	17.0209	29.643	23.683	23.3255	8.5833	17.2631	15.0525	27.1604	14.9233	42.1937	36.8477	19.3958	21.9318	20.0747	29.4058	20.097	16.8699	17.6419	24.0246	67.9922	11.1165	8.7581	15.6131	13.2116	16.5526	19.9447	16.8214	15.0047	14.4648	11.173	13.4395	8.71172	15.3202	19.1706
	2.76846	17.0662	38.4268	38.0823	18.3334	35.8378	22.7755	21.9615	36.9991	16.8873	25.6533	27.7559	13.6706	27.9882	35.6046	16.6309	24.4041	22.36	17.6125	9.4852	17.2025	14.1618	19.1961	11.6353	37.563	30.2716	15.4432	18.5902	15.2323	25.7759	17.9191	15.5085	15.2934	21.1969	50.7469	9.2446	10.0205	11.0711	13.4123	16.4284	17.7147	16.9625	15.2334	13.4359	11.9064	13.6307	9.68211	12.7883	15.007
	2.88883	16.4306	27.5567	34.9644	13.5251	32.8438	21.9061	19.1209	29.9709	16.1562	24.1593	26.6783	11.1326	25.538	33.2702	20.3621	20.8546	20.7486	15.7268	8.6777	11.8002	13.9798	19.3061	10.9967	25.765	28.8805	16.9642	17.9199	14.8989	25.4629	17.41	18.7949	12.3851	17.9019	36.3719	9.4445	9.2248	8.4686	13.2641	12.525	17.8412	14.1753	16.6598	12.327	11.8447	8.7393	7.43872	10.7623	11.7372
	3.00919	15.476	25.096	35.0586	12.7436	30.9173	15.0665	18.3855	24.4984	13.3512	22.6525	24.7745	12.0326	22.6755	30.0039	16.6001	23.6199	20.843	12.4949	6.1699	8.341	12.3978	14.1664	9.7738	24.9253	25.725	13.0821	16.9441	12.7461	23.2433	20.0714	18.6038	14.5306	14.844	30.751	10.6358	10.7257	9.7382	13.9921	10.3683	16.9069	12.7059	15.0036	12.0436	8.8665	8.5974	5.95048	9.3969	7.4669
	3.12956	17.3665	22.7194	32.3569	13.4723	31.4515	18.0116	17.5142	20.5551	11.9203	22.3168	24.0546	8.1723	18.7571	27.4076	16.1457	23.5658	17.4941	11.1396	8.4851	8.8369	14.6169	15.3234	10.5071	24.3359	21.4053	14.14	10.4396	7.8826	18.4372	16.2046	13.3274	14.471	11.8572	30.8439	9.358	12.4222	12.0496	13.2362	10.068	14.4163	13.9042	12.6212	9.209	10.4551	8.0242	4.97211	9.0689	7.9109
	3.24993	18.2488	22.9029	27.066	11.9835	30.6695	19.6763	15.0491	20.9182	13.2383	21.1525	22.7968	7.4035	15.5927	26.7582	19.2997	22.1236	18.3664	11.3341	6.0585	8.404	9.0701	13.5037	12.2752	22.9882	22.5899	13.4761	8.7151	8.2495	18.3762	17.678	12.8138	12.6571	10.5368	28.041	9.7344	9.7466	9.4826	13.153	11.3861	13.9858	12.2321	14.9441	8.0074	11.2112	8.4434	5.35029	9.9252	9.0099
	3.3703	17.0981	18.546	25.2183	11.7176	27.9899	15.6817	18.6224	23.4291	11.2451	20.3156	21.2235	6.9101	12.5797	21.6176	19.0265	20.6282	17.1653	11.8206	3.7347	8.7025	9.4196	14.2843	11.0134	19.7077	21.8313	12.7137	10.9692	6.5998	17.9411	14.8466	12.5159	13.0367	11.5386	26.4431	12.4388	8.8201	11.4782	13.0086	11.3454	13.0351	12.9641	12.5665	8.2535	8.7014	8.5275	6.28022	7.3623	8.083
	3.49067	18.1521	16.6895	23.0748	11.4877	24.9891	18.3964	14.8206	21.2363	10.1793	20.633	18.3154	8.0093	11.9636	19.0097	15.9095	17.4211	14.6388	10.9499	5.8444	8.311	11.2972	14.7142	10.5942	18.8793	21.4829	10.5827	9.2926	6.947	13.4057	14.5012	9.8577	12.3278	11.1632	22.1025	13.6052	9.455	9.2507	12.7476	10.574	13.6917	13.9032	13.6671	6.6855	9.8597	11.2562	5.44297	9.033	9.723
	3.61103	20.3903	17.4603	25.05	9.6369	24.0423	16.1124	15.6805	20.0099	14.3538	19.8417	19.4039	9.8309	11.421	19.8296	19.3562	14.9897	12.7162	10.7102	7.1237	7.8222	10.0775	14.8838	9.9075	17.8724	16.0959	12.7197	8.8711	8.7338	14.7136	11.5633	11.6568	9.9082	9.3421	19.895	10.8906	12.3231	10.0348	10.7452	10.7164	14.2359	12.3947	14.303	6.4317	8.2839	8.7644	4.80834	10.8492	7.2822
	3.7314	18.1048	14.4034	22.707	10.7112	23.6369	15.2165	13.0385	17.6245	10.9867	18.0844	20.7299	7.4106	13.6592	16.4947	18.663	14.4254	13.9548	12.0512	6.8265	7.2444	7.4507	13.5709	8.44	15.9644	16.7128	15.0748	8.0306	7.2417	15.4299	12.6042	11.1111	11.6587	8.2742	23.7169	10.0844	11.3489	12.3871	11.5589	10.5211	11.1524	14.2968	8.6462	5.3822	10.4027	10.0827	3.59591	8.7188	6.1959
	3.85177	21.7225	14.4915	22.7036	8.1986	21.9514	15.803	14.2085	19.9521	11.0044	15.6164	18.2287	7.9287	14.9227	17.8075	19.2039	14.4453	11.8173		6.5442	5.931	7.6018	13.5683	9.5296	15.9094	15.3504	15.7682	7.9888	6.0175	13.0991	11.3481	12.1324	14.1282	7.4667	20.5651	9.383	10.9415		10.1146	10.7787	10.8878		11.9549	8.1149	11.5469	8.416	4.44988	5.8963	8.0947
	3.97214	20.3811	15.3517	23.5903	9.6149	22.0363	13.8735	14.0324	20.6039	12.9456	15.5454	19.7444		11.5797	16.794	18.6262	15.459	10.6252		7.3958	7.0783	7.0302	14.6681	8.7633	13.7447	17.5849	14.6412	5.4284	8.1746	12.3987	11.1391	10.2049	11.6914	6.1871	17.3656	9.3197	9.452		9.205	9.59125	12.386		12.3567	6.047	10.6263	5.7971	5.28659	7.3237	7.3745
	4.09251	21.8983	13.0348	25.4553	8.0985	21.1329	15.51	11.9993	17.4108	10.0093	15.9108	18.0718		11.1601	16.5553	20.5637	14.7249	11.435		4.6762	6.136	6.2188	15.4233	10.2359	15.9526	15.8316	12.9585	8.0569	8.5332	11.2165	9.5765	10.7964	11.422	7.3865	21.181	9.5456	10.2552		11.2193	9.99068	13.7424		11.0623	7.0262	10.9207	5.3306	5.92911	6.8653	6.299
	4.21287	26.4782	14.8243	29.6647	7.2673	17.4421	17.6666	11.9781	15.8243	13.0483	15.2725	16.9168		11.0825	15.8309	21.5461	12.872	10.0729		4.9936	5.7201	7.5695	12.8783	11.5565	14.1977	15.3761	14.1263	7.6441	7.1366	14.3368	9.659	9.29	12.5273	7.9088	18.6374	10.314	9.1934			12.6305	12.9912		10.4955	7.0173	9.1427	5.9988	6.38465	7.3647	5.5986
	4.33324	23.0011	11.9463	24.855		17.4347	16.9807	10.7811	15.6331	10.2782	15.0402	17.2451		10.8375	17.4023	17.6123	15.4888	8.6722		5.5236	4.8043	7.7593	13.4158	11.0667	13.0039	13.8617	11.6115	8.8308	9.5256	14.1403	10.8672	10.6786	11.2137	6.9653	15.6211		7.3595			13.5576	14.3181		14.4484	6.6348	7.9664	4.1546	5.60896	9.0103
	4.45361		9.0197	25.4882		17.0342	18.9349	12.3559	21.4939			16.3829		9.0866	16.6989	15.173	12.1914	13.8863		6.3104	5.1728	7.476	11.4159	9.7001	11.4006	11.8511	11.3004	8.4318	7.2039		10.7947	11.0792	9.6409	9.0663	15.059		9.3885			12.5313	15.5901			4.6539	10.0854	7.5712	7.01429	7.8598
	4.57398		9.2129	24.7852		14.1645	18.6767		17.9226			16.0552		9.8043	17.0696	16.1338	11.6116	10.6889		8.7968	6.6809	8.4369	12.0437	11.8659	13.0579	12.57	9.2128	8.6649	7.4923		9.355	10.4154	6.8587	7.8238	14.9229						12.6026			4.3411	11.3933	7.8108	6.93148	6.8244
[truncated: 60 more columns]
