# Supplementary material for: Vinculin recruitment to α-catenin halts the differentiation and maturation of enterocyte progenitors to maintain homeostasis of the Drosophila intestine
Source: eLife. 2022 Oct 21;11:e72836. doi: 10.7554/eLife.72836 (PMC9586559; doi:10.7554/eLife.72836)
Supplement: Figure 7—source data 1. [file elife-72836-fig7-data1.xlsx]

## Sheet: Figure 7B
Figure 7B
	Differentiation index
	RFP+/GFP-cell ratio over number of total DAPI nuclei
	14 days
	Ctrl	sqhDD	vinc102.1	vinc102.1 + sqhDD
	2.23881	0	25.2874	66
	10.4478	10.9244	17.037	50.9881
	2.75229	10.7438	45.5446	55.1587
	0	4.87805	54.7804	57.0111
	0	17.4757	34.4749	4.54545
	0	14.2857	36.5217	57.7295
	36.3095	19.403	21.0667	32.0225
		11.0169	43.3071
		15	36.8794
		16.9014	37.9747
			35.5263
			37.2973
			39.3162
			36.3281

## Sheet: Figure 7D
Figure 7D
	Vinculin intensity across the membrane
	vinculin-GFP intensity between progenitors
	Distance	Ctrl
	0	5.0232	4.75251	6.8083	6.546		10.8765		14.4893	8.5611	8.0551				8.944	12.3494	9.4215	16.4244			10.5243	16.2516		7.5444	10.7464		7.9297	14.473		10.753		13.0571			17.8708	14.3534	18.3151		9.4422	8.1438	8.6028		16.8139	6.1061	6.5687		7.4242		9.3859
	0.120367	4.6625	3.54182	7.5679	7.0943		12.7731		12.5862	6.1267	8.6469	8.2733	11.0917		8.1168	14.5566	10.6291	14.8842			9.5697	16.3143		7.8466	10.9689		7.2346	14.1626		12.2013		13.2744		9.0562	16.5998	15.2024	20.5238	12.0886	9.8208	10.7148	8.9142		15.6106	6.6897	8.0815	10.8753	6.4849		7.9014
	0.240735	4.9657	3.0823	7.2954	5.3561		11.8809		13.3333	6.4242	7.3391	7.1725	10.6127		7.6016	11.7755	8.3011	13.7883	9.1023		7.5668	16.2392	10.3801	10.4134	10.5922		9.6116	13.679		17.6		13.364	15.1985	8.7472	18.0689	16.6554	18.7787	10.8474	7.9729	9.4071	9.3855	10.5147	15.9232	8.3634	7.4002	11.3319	5.5427		7.5407
	0.361103	4.417	2.40516	7.5634	4.5459		13.0829		14.0853	5.3842	5.8983	8.7443	11.421		8.7468	10.974	7.1519	11.028	7.4115		8.1886	17.092	10.1733	10.2652	9.82638	15.5383	8.6294	16.8925	12.1249	11.3629		10.6119	12.9685	9.5441	16.9049	13.9854	19.865	12.1065	9.5728	9.0347	10.2657	11.4959	16.0453	9.1116	5.8331	15.7328	7.0097		8.6744
	0.481471	5.4031	4.13849	9.1701	4.3364	8.4171	12.4917		12.6761	7.0884	6.9538	6.959	10.9214		8.4375	12.8381	9.1314	12.7349	9.7119	8.20273	9.3631	15.8818	9.813	10.2319	9.72946	13.9387	9.9401	14.5757	15.3775	11.5882	8.8222	13.7466	13.3525	8.0085	15.9626	12.8856	15.8877	12.3324	9.8227	12.0786	11.5292	9.45481	17.3329	9.6101	7.0759	14.9734	8.4569	14.7675	10.0407
	0.601839	5.1157	5.22341	7.8859	5.8036	8.2663	12.3248	7.0993	16.368	6.9806	9.2008	8.8265	12.7721		6.7744	13.8928	10.1109	12.3785	10.7862	5.78089	11.394	12.5044	8.1368	9.0641	7.21963	13.816	10.2467	11.719	14.4762	11.8452	9.638	15.1333	16.6251	7.9681	13.7489	16.128	17.5098	13.1546	11.6557	10.5803	11.7398	9.2018	19.8064	8.2941	7.814	17.6064	8.5705	11.405	10.1602
	0.722206	4.7889	4.31532	6.4015	7.3903	8.7522	14.1802	6.051	14.044	6.8634	8.9478	8.7652	13.6297	13.3851	9.1445	12.6985	13.8727	13.5658	10.4641	7.56153	8.9502	12.3945	8.7121	9.6617	8.5368	13.458	9.7679	14.3627	14.28	14.0225	8.7234	13.5498	14.7402	8.7393	16.65	19.3939	18.2909	10.5188	11.7938	10.5157	10.2479	11.344	17.519	7.737	7.4076	19.3171	9.7653	10.7981	8.4441
	0.842574	5.1122	2.92667	7.4306	6.9455	9.3778	17.0564	4.7829	14.2953	8.5352	8.0605	9.5546	12.5543	13.3151	10.5613	12.3363	15.1209	12.7509	9.8687	7.73336	9.1791	15.0566	11.434	9.2475	10.4637	11.7362	9.9022	14.4472	14.7597	10.5841	7.9139	10.8659	15.7706	8.0037	16.3855	17.2935	18.4163	11.8338	11.3243	11.9815	13.5273	10.2666	18.8873	8.4929	8.6938	21.0522	11.4463	12.2982	9.1339
	0.962942	6.7196	3.67504	9.4158	5.6231	10.3686	18.5535	5.3086	16.0852	10.0008	10.0504	9.8943	14.5238	12.9577	11.7443	11.2649	13.4789	12.3582	11.8212	7.1562	7.5808	15.9263	11.0094	8.8264	10.721	12.8209	11.9008	13.217	13.9762	9.025	6.9885	12.6386	14.1131	8.0934	15.3609	18.7591	19.7314	9.4775	8.7844	14.4364	13.327	10.936	19.2128	8.3045	9.2899	23.6013	10.376	13.9901	10.3217
	1.08331	6.6573	4.39185	8.1759	8.8009	13.1085	19.5478	5.937	13.213	10.4134	7.8313	10.1564	11.9855	13.0027	10.8561	14.6936	11.6139	12.1256	10.9483	8.6093	7.0205	12.7851	9.0381	8.1394	9.59352	12.5746	13.5362	12.5063	14.7656	8.5473	8.8051	12.9676	14.822	7.8574	12.2106	19.088	18.413	9.2518	11.4659	15.2273	12.4707	11.5477	16.5226	8.0128	8.4725	21.3749	11.5468	13.6655	12.4821
	1.20368	6.7597	3.317	8.0356	9.2801	11.3249	16.7139	7.2181	12.9097	9.8644	8.7478	8.8426	13.9295	11.4908	8.8247	12.5898	12.6276	14.1633	14.5832	9.74131	8.4144	14.5697	8.3542	8.1332	9.82889	10.0911	12.7215	17.0203	12.5637	10.3331	9.9383	9.9982	15.3433	8.8991	13.4163	21.2904	17.6473	9.1722	11.9776	12.0695	12.5867	13.589	15.3054	8.5645	10.2135	24.3447	11.9993	13.9627	11.8231
	1.32404	7.6774	6.26228	7.253	8.5182	9.8921	17.9819	6.2602	11.0009	12.0479	8.5196	9.885	14.3984	11.6455	9.5025	15.0253	11.7689	16.6765	14.1408	8.33934	9.4251	18.466	7.7885	11.3399	10.1589	11.379	14.208	15.9225	14.5268	15.1451	9.8275	11.5733	15.6449	11.0561	13.8264	22.2238	22.9362	10.1282	11.3958	11.6842	16.2555	12.1806	20.4918	10.0633	8.1082	24.8418	10.0293	12.5503	13.491
	1.44441	7.6215	5.17036	9.8851	7.9842	11.5612	17.7701	7.375	14.5526	12.2789	9.7291	9.7383	16.0689	12.9507	10.7312	18.872	13.2557	15.5927	15.7612	7.69989	9.5536	16.8348	9.6821	11.0155	9.796	12.32	15.9771	16.7147	14.2822	11.7526	8.7186	14.3408	14.9546	10.6524	16.1471	22.7043	25.6337	9.0514	10.2981	11.3355	14.7905	12.439	18.705	10.9657	9.5524	29.4302	11.1055	10.945	15.3502
	1.56478	10.3075	4.33429	9.8972	6.8465	13.2472	21.8558	5.6173	17.8427	12.5421	11.3804	11.3568	16.6829	15.1928	12.3202	16.3308	13.2216	13.654	20.4815	8.13741	10.3278	18.5181	9.9791	9.9426	9.46494	13.4354	19.9297	16.6668	16.2288	15.0723	8.0028	13.1752	10.4362	9.0564	18.3135	25.6063	24.7175	12.064	10.5445	11.7826	14.5385	13.441	21.1023	9.6226	8.2172	26.368	10.4938	13.6305	14.9938
	1.68515	13.7706	5.13354	8.4209	7.7285	12.4012	24.464	7.9443	21.0286	14.4742	12.5017	12.4672	18.839	16.6927	15.5541	17.6644	13.1465	15.0898	21.8305	7.6048	10.5276	18.354	9.7952	12.1646	8.79557	15.0378	21.3227	18.276	18.5708	13.8179	10.4989	15.0631	11.761	10.8868	19.6957	31.1581	32.4603	11.2092	13.2934	15.4566	14.7533	14.0447	22.1176	9.0428	10.0155	24.8225	11.7476	12.1574	16.8856
	1.80552	15.6996	6.05832	12.0235	6.9044	13.1276	28.6837	12.8618	28.1211	15.1882	13.6522	11.7805	22.4077	18.326	17.2715	16.931	13.4106	16.006	22.1303	9.64035	11.1353	18.9301	13.5961	13.6156	8.7417	13.5265	22.901	18.7652	20.581	18.3994	15.1298	15.2105	11.6471	12.307	22.3678	36.2001	36.1098	10.2895	11.5572	21.1653	17.2359	13.5835	22.9824	9.4728	13.0185	28.0557	17.4396	12.4385	19.8903
	1.92588	14.9544	6.35668	11.0327	6.7441	12.5958	33.6345	14.2774	30.5348	16.4255	20.9783	11.4938	28.3011	22.4904	18.3889	18.4888	18.4632	17.4002	20.4283	12.5206	14.342	22.165	14.4889	14.7772	8.68111	18.2617	19.6406	20.0122	22.8511	17.3316	19.2323	18.4039	11.5848	17.3543	28.5693	44.3208	41.6721	14.3644	14.067	23.8983	17.4756	14.0149	23.3076	12.3294	17.3614	29.8381	16.5002	15.832	22.9573
	2.04625	16.0021	7.58119	11.4631	7.8328	19.0231	37.394	18.9897	34.2701	20.4648	27.5434	17.795	30.8735	22.5939	20.0122	19.6516	19.0261	19.8055	18.5385	11.2838	14.528	19.1587	15.3677	14.8692	9.90044	19.0628	23.0061	24.4375	24.2599	19.865	22.752	20.2425	11.485	22.051	30.5701	64.9178	47.5677	17.2676	16.5501	30.5644	18.2654	15.4854	26.1106	12.4648	18.2254	34.8798	18.3009	19.1696	26.5632
	2.16662	17.8187	7.44019	15.6373	12.2404	27.3339	42.6204	20.3123	43.7689	27.3031	36.785	25.8149	29.8114	27.9917	24.4002	23.1848	23.3779	19.6199	20.7528	10.6039	17.1694	23.8693	20.8599	14.8754	11.7777	22.2243	24.7807	28.4213	24.4976	23.198	29.3566	27.339	14.507	27.9326	39.022	79.6805	54.9384	21.257	19.4049	37.2159	19.5881	15.5822	34.2916	15.006	16.2304	38.9393	20.4702	24.216	25.1467
	2.28699	18.2997	11.2218	15.7529	18.8732	31.7764	46.4178	24.3909	54.3591	29.2876	40.383	31.3347	37.1787	31.2061	25.6074	23.6846	23.9332	21.4401	24.6011	12.9274	20.6791	28.5297	25.4321	17.8398	12.8894	25.1034	26.4407	29.8449	25.2883	27.4131	31.8284	28.518	20.7721	37.1827	40.9396	85.317	63.5092	20.4018	24.9807	39.9735	20.3537	15.7079	36.5596	16.1693	19.7787	44.2823	26.5813	24.5544	28.5302
	2.40736	14.1115	10.1044	12.257	18.3987	25.8191	43.013	21.4757	50.7955	26.5144	33.7792	30.9531	32.8949	27.9111	23.7046	19.544	21.9095	19.0258	23.08	11.9169	19.7389	25.2673	23.9656	17.365	11.2016	24.2926	25.8322	26.0722	21.2963	25.7292	31.1053	26.1571	19.0226	34.3915	34.8411	82.3893	63.0235	17.4159	23.6657	31.3079	17.9616	12.3556	35.0109	15.085	17.281	41.0173	23.0726	21.0491	21.5163
	2.52772	15.1486	9.95939	11.6561	17.5611	22.5777	35.754	20.6951	36.5686	23.6315	24.8032	25.1864	33.3437	26.4071	23.6834	21.0809	20.3383	18.5247	19.1372	9.20454	19.9893	18.525	23.8726	14.4768	9.76738	24.2105	25.7999	21.2565	20.3705	24.9889	29.4454	21.3308	15.8626	33.1149	27.3805	68.6375	51.2705	12.6658	17.6986	20.2308	19.2382	12.8965	26.8388	13.708	13.3734	32.0756	24.6356	19.2636	16.7173
	2.64809	12.5821	9.20119	8.7151	14.4551	20.6931	28.2564	19.3756	23.2075	17.3577	16.809	25.0851	29.2767	23.5323	20.4259	20.9512	18.7481	18.5541	21.3199	10.8869	15.3334	20.6784	20.9338	8.0032	8.35516	21.9969	20.7929	19.7799	17.3477	21.6853	25.8717	20.6639	15.5851	35.8507	24.0147	52.0654	48.909	12.7594	14.8736	14.0054	19.646	13.9657	21.7674	11.7056	11.7173	28.1613	24.8968	21.4474	14.3377
	2.76846	17.0724	5.67096	8.5814	13.6685	17.8591	31.5089	20.4025	23.963	18.5209	12.9023	21.4088	20.3422	25.0711	19.1192	21.5452	16.4761	15.1689	19.2854	11.9963	10.7603	23.24	16.7459	12.6151	9.04441	17.1258	17.2183	16.7192	18.8911	15.031	19.7197	16.5565	13.5725	29.348	18.9511	40.8913	50.2295	13.0673	10.6928	14.3307	17.9532	9.07711	20.1197	9.4568	11.9484	22.6656	26.2509	19.844	15.3544
	2.88883	16.3265	3.96589	6.2119	9.7891	17.5278	27.7997	17.3032	22.0071	19.1528	8.1917	17.6049	16.2846	21.0629	14.4218	17.0555	16.5104	15.6534	17.9688	10.1638	14.2178	21.9299	16.3699	8.8751	10.8907	15.4328	19.4334	18.5141	18.1758	14.1212	15.9268	16.9078	8.7099	24.7379	17.9757	38.9364	40.5188	9.5098	9.4676	14.9814	15.0058	10.3308	20.0271	8.9228	15.0743	19.4842	19.3971	14.605	12.635
	3.00919	12.141	3.94037	6.6033	8.7793	15.3262	27.9079	14.5252	16.7394	15.6674	7.1996	14.7946	14.7297	14.1959	10.2236	15.6701	17.9635	15.4597	17.4599	7.77353	14.3894	18.392	13.3326	8.996	9.43025	13.5483	14.9115	18.7074	21.6903	13.0973	15.8417	14.5168	7.7083	18.3575	16.6216	34.3662	45.4267	7.0005	8.0345	13.9064	15.6399	9.32531	20.3608	10.2766	13.0268	20.0626	17.4602	14.2557	10.0393
	3.12956	10.8801	3.88209	7.9604	9.7251	12.392	26.0104	14.9374	13.9054	14.0317	5.2308	11.5462	10.4268	14.3062	9.4527	18.8414	11.948	14.545	16.9053	6.40361	14.6508	19.944	11.9026	7.9191	6.79109	11.974	11.7569	15.8433	18.0445	13.4432	19.4395	13.4931	12.1136	17.534	14.9104	37.9411	40.5444	8.3896	8.2163	13.7623	10.5364	8.83675	21.5741	8.7317	10.4696	15.8091	17.9543	17.6288	11.7692
	3.24993	6.1108	4.08201	8.1379	8.0377	12.0301	24.0068	13.072	12.9013	11.7718	6.0824	13.283	10.3306	12.4406	13.3491	15.1807	10.5214	13.1437	16.3397	6.83263	11.5908	17.5446	12.3129	9.5826	8.42021	13.3163	14.6894	18.2159	17.267	14.5444	14.9315	13.9469	11.916	20.4292	12.0559	37.7414	40.0924	8.0186	6.7583	12.459	10.4203	8.87065	18.3395	8.5782	10.4677	17.7677	12.3619	13.9508	12.3098
	3.3703	6.1283	3.58842	6.6646	9.7569	12.4184	26.4139	12.3473	12.5818	11.1848	6.6608	10.6674	11.5376	11.9186	11.5994	15.9311	11.3573	9.8525	16.0956	6.8522	11.2681	19.1456	12.7551	11.1399	9.15547	10.4366	12.9506	18.4449	17.931	12.98	11.1939	14.0232	9.1964	16.2907	11.4398	32.8908	38.7775	6.0262	6.6076	11.4912	9.9959	9.57598	18.4678	10.2402	10.0894	15.527	10.8373	12.1854	11.2659
	3.49067	7.0695	3.49203	4.6817	8.1575	11.925	27.2978	9.7482	12.2105	12.0462	6.346	12.703	9.0437	11.8639	12.5193	18.521	12.6951	13.0233	15.0191	7.99548	12.5724	18.0972	12.2351	10.8058	8.22085	12.4315	11.4437	17.6911	18.9166	12.0225	10.4675	15.1451	6.9907	11.6382	10.9382	35.0086	38.432	5.773	4.8737	13.3387	7.684	10.1555	18.4815	8.8573	9.3093	15.3158	10.8476	12.6963	12.1334
	3.61103	5.4224	2.33589	5.047	6.1393	10.8104	28.7186	10.0388	10.7308	15.5822	4.9406	12.097	11.0553		14.1466	17.6281	14.4215	14.8922	16.0083	8.83177	12.9765	17.8731	11.8386	7.8783	9.7306	16.7953	11.2994	15.9508	17.7791	11.3177	9.5284	14.3324	9.1659	12.9777	7.9397	30.5196	42.6282	6.3356	4.9998	11.8146	6.8169	11.7653	21.1693	6.6129	8.8762	14.2712	13.2777	13.4893	10.8439
	3.7314	4.2437	3.63043	6.2098	8.8217	8.9781	27.8532	10.2903	11.0062	13.8819	4.8389	13.2056	8.8478		13.5896	14.689	12.3078	13.7833	12.2872	9.18031	14.303	18.0384	11.1655	10.5895	9.19906	14.8918	10.2016	15.1096	18.7588	11.6984	10.1859	10.9188	9.2705	12.5756	10.5682	30.5165	39.1712	5.5171	3.9736	10.6056	11.3736	11.7368	20.0899	8.4958	9.7518	13.9284	8.618	12.8991	13.178
	3.85177	5.311	4.15264	6.3719	8.1394	9.5292	27.734	11.1763	9.4127	15.8188	4.4313	11.4541	10.1578		13.7538	11.2581	11.5955	15.0296	15.3702	7.09263	13.3607	17.5406	11.1132	10.6366	8.096	15.6274	12.1585	14.3397	19.012	10.2788	8.7814	12.0038	8.2244	12.6672	8.0473	30.9268	35.5951	4.0277	4.2741	8.056	7.8165	13.174	19.8125	8.5633	11.5011	12.8377	9.9785	15.0327	9.9414
	3.97214	5.575	3.46722	4.7838	6.1402	8.9927	25.3223	12.2943	9.6378	15.7952	4.6002	12.0873	9.635		8.8615	9.965	12.488	13.6839	16.6256	8.73312	13.09	16.697	15.1863	9.4891	8.14413	14.2991	15.9064	12.2334	19.4861	8.8138	8.4007	12.1413	12.1714	13.5091	8.1936	29.9157	37.0502	3.7944	4.9509	7.7279	8.5021	9.24545	19.6946	8.202	11.1103	13.4491	10.5301	11.0084	11.7879
	4.09251	5.7021	3.09452	5.6714	6.143	11.2698	29.4323	11.8912	6.7994	10.6884	3.9881	11.538	9.7978		9.335	10.9864	13.7859	16.1584	14.9136	8.30702	12.5499	17.5834	15.9408	8.4683	8.48235	16.5308	12.2506	12.0533	20.6127	9.2735	8.9942	13.0858	10.11	12.4509	9.5783	29.6246	39.8014	4.6245	5.5065	9.3836	8.4875	11.0384	16.5223	8.9427	11.1229	12.4128	7.5354	13.5937	11.0178
	4.21287	5.4374	4.86032	3.7077	6.731	9.7484	28.321	10.0919	9.1462	10.9836	4.5702	8.9352	8.8032		9.4188	9.885		15.7485	13.4975	8.88927	12.2084	17.5414	12.8984		7.40303	16.369	12.6621	12.5504	17.9037	10.7204	8.8068	11.2156	11.3072	11.2755	9.0813	31.6015	47.7663	6.5077	3.2725	9.9759	8.8122	10.471	16.3014	8.7976	9.4678	12.2226	7.7594		10.3762
	4.33324	3.495	3.20247	3.8941	8.1602	10.0502	30.8823	9.4736	8.4841	13.5608	4.891	11.1507	9.963		10.4718	9.3509		15.5594	14.8521	8.53915	14.1271	16.6849	16.1572		7.71391	14.9474	9.8051	11.0132	12.1464	8.9214	8.0334	9.8912		11.8632	8.5428	29.7939	45.5296	3.6387	4.3151	10.2036	8.5943		15.066	11.6027	9.6965	10.5632	7.521		11.6042
	4.45361	4.0843	2.65605	4.0881	8.0466	7.2041	34.3102	10.3674	6.1463	12.6093	3.5284	8.4706	15.0357		9.5345	9.6168		16.8208	15.179	8.67299	14.5886	19.0599	15.5796		8.27607		9.1754	11.5709	14.6977	8.5751	8.8523	10.386		11.6405	9.0883	29.4081	50.2067	4.2781	5.457	8.4708	11.2029		14.0009	9.4095	9.9772	11.4821	8.2
[truncated: 77 more columns]
