# Supplementary material for: Vinculin recruitment to α-catenin halts the differentiation and maturation of enterocyte progenitors to maintain homeostasis of the Drosophila intestine
Source: eLife. 2022 Oct 21;11:e72836. doi: 10.7554/eLife.72836 (PMC9586559; doi:10.7554/eLife.72836)
Supplement: Figure 8—figure supplement 1—source data 1. [file elife-72836-fig8-figsupp1-data1.xlsx]

## Sheet: Supp.Fig.8C
Supplementary Figure 8
	Gut width (𝛍m)
	Day 7			Day 14					Day 18					Day 21					Day 25					Day 28
	yw, 7 days fed	vinc102.1, 7 days fed		yw, 14 days fed	vinc102.1, 14 days fed	yw, 7 days fed, 7 days starved	vinc102.1, 7 days fed, 7 days starved		yw, 18 days fed	vinc102.1, 18 days fed	yw, 7 days fed, 7 days starved, 4 days refed	vinc102.1, 7 days fed, 7 days starved, 4 days refed		yw, 21 days fed	vinc102.1, 21 days fed	yw, 7 days fed, 7 days starved, 7 days refed	vinc102.1, 7 days fed, 7 days starved, 7 days refed		yw, 25 days fed	vinc102.1, 25 days fed	yw, 7 days fed, 7 days starved, 11 days refed	vinc102.1, 7 days fed, 7 days starved, 11 days refed		yw, 28 days fed	vinc102.1, 28 days fed	yw, 7 days fed, 7 days starved, 14 days refed	vinc102.1, 7 days fed, 7 days starved, 14 days refed
	109.778	183.901		139.4	189.96	69.1848	143.923		160.85	218.603	210.869	206.213		105.228	223.381	167.053	174.182		156.159	185.697	112.211	131.067		116.401	181.621	132.477	181.583
	139.894	141.331		136.459	194.921	89.2894	108.807		146.226	185.383	127.215	210.185		137.967	148.235	128.443	168.142		133.805	180.086	112.401	187.599		124.968	174.88	128.249	161.791
	131.533	202.662		155.147	148.685	66.9903	105.785		135.167	156.505	143.022	204.754		141.182	180.017	139.443	206.638		112.27	151.741	150.78	185.915		107.855	164.799	106.686	149.466
	129.02	158.57		139.359	167.032	78.0898	139.07		136.135	197.048	180.28	209.691		155.35	168.207	165.898	218.89		135.54	181.926	137.334	155.115		150.061	180.411	135.295	175.26
	142.998	191.634		124.682	223.419	78.5878	160.093		181.175	182.548	185.946	204.093		138.39	152.121	140.709	194.161		140.021	192.989	122.98	185.314		110.655	154.029	163.658	219.983
	130.63	181.822		134.833	211.443	73.2257	143.17		141.528	183.305	139.06	228.467		129.565	207.322	149.314	225.065		172.142	177.494	122.406	172.636		159.602	149.988	120.933	195.488
	96.3316	170.6		153.681	183.952	107.345	128.482		113.01	172.152	149.265	203.92		185.417	201.089	129.303	218.959		119.592	176.664	156.916	151.198		128.183	164.56	110.721	165.023
	109.792	209.326		135.129	169.037	93.6714	135.884		114.278	200.242	133.106	205.891		151.197	199.924	143.589	215.848		131.561	175.267	126.233	173.348		118.182	151.136	129.186	200.581
	135.869	152.339			227.281	62.3218	117.59		148.702	178.15	167.267	219.163		143.634	184.646	152.913	173.559			216.166	97.6076	144.757		137.117	177.974	133.127	222.368
	148.145	240.578			187.049	76.8414	117.922		148.691	187.945	154.956			126.388	189.787	130.351	232.145			176.954	135.277	177.29		117.621	189.141	113.525	184.978
	170.114	177.67			201.124	76.1114	124.657		181.863	211.098	166.7			147.356	211.319	151.602	187.167			154.914	137.459	162.731		128.463	164.176	117.888	164.197
		146.102			164.809	86.5537			127.969	151.336	160.909			164.123	213.915	121.594	158.562				143.132	153.379		130.119	151.322	126.42	182.047
																						141.061		121.76	179.893	133.701	201.798
																						164.356		115.993	173.957	109.767	198.344
																								113.566	181.023	157.901
																								106.997	190.119
																								154.313	130.154
																								102.676	170.199
																									144.01
																									157.815

## Sheet: Supp.Fig.8D
Supplementary Figure 8D
	Gut length (mm)
	Day 7			Day 14					Day 18					Day 21					Day 25					Day 28
	yw, 7 days fed	vinc102.1, 7 days fed		yw, 14 days fed	vinc102.1, 14 days fed	yw, 7 days fed, 7 days starved	vinc102.1, 7 days fed, 7 days starved		yw, 18 days fed	vinc102.1, 18 days fed	yw, 7 days fed, 7 days starved, 4 days refed	vinc102.1, 7 days fed, 7 days starved, 4 days refed		yw, 21 days fed	vinc102.1, 21 days fed	yw, 7 days fed, 7 days starved, 7 days refed	vinc102.1, 7 days fed, 7 days starved, 7 days refed		yw, 25 days fed	vinc102.1, 25 days fed	yw, 7 days fed, 7 days starved, 11 days refed	vinc102.1, 7 days fed, 7 days starved, 11 days refed		yw, 28 days fed	vinc102.1, 28 days fed	yw, 7 days fed, 7 days starved, 14 days refed	vinc102.1, 7 days fed, 7 days starved, 14 days refed
	5.42079	4.54714		4.58868	5.17008	2.83026	3.58706		5.20474	4.42233	4.36409	4.96714		4.75147	5.38404	4.76579	5.28978		4.80333	4.86874	4.69815	4.71509		4.38949	5.02111	4.65442	4.17029
	5.09398	4.56362		5.93541	5.88339	2.85753	3.79671		5.61789	5.51398	4.85922	4.15938		4.14113	3.59878	4.21648	4.29788		3.66135	4.07697	4.69235	5.96665		4.22462	4.86868	5.04288	4.64028
	5.55245	4.89433		4.98323	4.56098	3.36601	3.21875		4.24577	4.99725	4.82691	5.86833		4.89711	4.76992	4.3774	4.47238		3.72397	5.01221	4.42143	4.9537		4.41943	6.07345	5.14926	3.06694
	3.70344	5.10185		4.61514	5.87224	3.13206	4.39281		3.68825	4.49844	5.21123	4.51941		3.87045	4.59547	4.0327	4.56163		4.61809	4.27656	3.99856	5.0597		4.94725	4.92278	4.75506	4.95302
	5.80065	5.05763		4.905	6.11114	3.177	4.51782		5.07081	4.1387	4.20104	4.5345		4.29635	4.84783	3.97759	4.78292		4.38675	4.34462	4.80752	5.87529		3.80442	4.33905	4.60166	4.67731
	3.92791	4.30582		4.91247	6.51048	2.76349	2.72827		5.55125	5.99661	4.60988	4.82407		4.90704	5.13197	3.81718	4.9487		4.89115	4.7387	3.85954	4.82705		4.49115	4.80324	3.71639	3.64414
	4.33227	4.93991		5.15275	6.4035	2.62302	3.19814		4.56374	4.34049	3.7477	5.0949		4.89893	5.54864	4.17142	3.67763		4.86529	5.16564	3.47528	3.92555		4.6665	4.68835	3.8095	3.99386
	4.12044	4.56232		4.50309	5.03312	3.50535	3.50507		5.40015	4.82676	3.84464	5.55998		4.19053	5.67154	4.97606	4.93321		4.30846	4.39309	4.79575	3.70605		4.20608	4.32665	4.22208	5.11365
	3.80122	5.06975		3.65989	5.56508	3.45273	3.46085		4.67413	5.27458	4.80845	5.05717		4.41139	4.64759	4.38621	4.10587		3.5438	4.07296	3.84998	4.81102		3.63451	5.44979	4.17156	5.02249
	4.4271	5.25895		4.37316	5.6715	2.92574	3.73442		4.1378	6.07131	4.12789	4.14368		4.82717	4.4545	3.58425	4.40242			3.96318	3.92749	4.8657		4.19529	4.43793	5.1484	4.52797
	4.3738	4.47576			5.09471	2.13462	3.84123		4.76896	5.30654	4.35418	4.0277		4.29675	5.14351	3.85638	4.77421			3.8094	3.95834	4.45187		3.99204	4.56022	3.37114	3.73043
	3.9436	5.10621			4.42544	3.28473	3.67587		4.69851	4.06327	4.62576			5.03567	4.83933	5.0399	5.57138				4.16449	4.33248		4.66624	4.08119	3.88797	4.17126
																						4.65852		4.52013	4.54168	4.72737	5.61632
																						4.52161		3.25355	5.01323	4.01051	4.35929
																								3.92922	4.39001	3.93639
																								4.12181	4.69272
																								4.21566	3.37608
																								3.80882	4.21158
																									4.26966
																									3.16136

## Sheet: Survival_raw numbers
		Day 4	Day 5	Day 6	Day 7	Day 8	Day 9	Day 10	Day 11	Day 12	Day 13	Day 14	Day 15	Day 16	Day 17	Day 18
CONTROL yw		(fed)	(fed)	(fed)	(water/fed)	(water/fed)	(water/fed)	(water/fed)	(water/fed)	(water/fed)	(water/fed)	(water/fed)	(fed)	(fed)	(fed)	(fed)
Fed-starved-refed	Vial 9	12	12	12	12	12	12	12	8	5	3	3	3	3	3	3
	Vial 10	11	11	11	11	11	11	11	8	7	4	3	3	3	3	3
	Vial 11	12	12	12	12	12	12	12	11	9	7	4	4	4	4	4
	Vial 13	12	12	12	12	12	12	12	12	8	6	3	3	3	3	3
	Vial 14	11	11	11	11	11	11	11	10	7	7	4	4	3	3	3
	Vial 15	12	12	12	12	12	12	12	9	8	7	5	5	5	5	5
	Vial 16	12	12	12	12	12	12	11	9	9	8	5	5	5	5	5
	Vial 18	11	11	11	11	11	11	11	11	8	4	3	3	3	3	3
	Vial 21	12	12	12	12	12	12	12	12	8	8	6	6	6	6	6
	Vial 22	11	11	11	11	11	11	10	10	9	8	5	5	5	5	5
	Vial 24	12	12	12	12	12	12	12	11	10	8	5	5	5	5	5
	Vial 25	12	12	12	12	12	12	12	10	9	7	3	3	3	3	3
	Vial 26	12	12	12	12	12	12	12	12	9	5	5	5	5	5	5
Continuously fed	Vial 2	11	10	10	10	10	10	10	10	10	10	10	10	10	10	10
	Vial 4	12	12	12	12	12	12	12	12	12	12	12	12	12	12	12
	Vial 5	11	11	11	11	11	11	11	11	11	11	11	11	11	11	11
	Vial 6	11	11	11	11	11	11	11	11	11	11	11	11	11	11	11
	Vial 7	11	11	11	11	11	11	11	11	11	11	11	11	11	11	11
	Vial 8	12	12	12	12	12	12	12	12	12	12	12	12	12	12	12
vinc102.1
Fed-starved-refed	Vial 10	12	12	12	12	12	12	12	12	12	11	9	9	9	9	9
	Vial 11	12	12	12	12	12	12	12	11	10	9	6	6	6	6	6
	Vial 12	12	12	12	12	12	12	12	12	10	9	8	8	8	8	8
	Vial 13	10	9	9	9	9	9	9	9	6	5	5	5	5	5	5
	Vial 16	12	12	12	12	12	12	11	11	11	9	7	7	7	7	7
	Vial 17	12	12	12	12	12	12	11	9	7	7	6	6	6	6	6
	Vial 18	12	12	12	12	12	12	12	12	11	10	7	7	7	7	7
	Vial 19	12	12	12	12	12	12	12	12	11	11	8	8	8	8	8
Continuously fed	Vial 3	12	12	11	11	11	11	11	11	11	11	11	11	11	11	11
	Vial 5	12	12	12	12	12	12	12	12	12	12	12	12	12	12	12
	Vial 6	12	12	12	12	12	12	12	12	12	11	11	11	11	11	11
	Vial 7	12	12	12	12	12	12	12	12	12	12	12	12	12	12	12
	Vial 8	12	12	12	12	12	12	12	12	12	12	12	12	12	12	12

## Sheet: Survival_%
		Day 4	Day 5	Day 6	Day 7	Day 8	Day 9	Day 10	Day 11	Day 12	Day 13	Day 14	Day 15	Day 16	Day 17	Day 18
CONTROL yw		(fed)	(fed)	(fed)	(water/fed)	(water/fed)	(water/fed)	(water/fed)	(water/fed)	(water/fed)	(water/fed)	(water/fed)	(fed)	(fed)	(fed)	(fed)
Fed-starved-refed	Vial 9	12	12	12	12	12	12	12	8	5	3	3	3	3	3	3
	Vial 10	11	11	11	11	11	11	11	8	7	4	3	3	3	3	3
	Vial 11	12	12	12	12	12	12	12	11	9	7	4	4	4	4	4
	Vial 13	12	12	12	12	12	12	12	12	8	6	3	3	3	3	3
	Vial 14	11	11	11	11	11	11	11	10	7	7	4	4	3	3	3
	Vial 15	12	12	12	12	12	12	12	9	8	7	5	5	5	5	5
	Vial 16	12	12	12	12	12	12	11	9	9	8	5	5	5	5	5
	Vial 18	11	11	11	11	11	11	11	11	8	4	3	3	3	3	3
	Vial 21	12	12	12	12	12	12	12	12	8	8	6	6	6	6	6
	Vial 22	11	11	11	11	11	11	10	10	9	8	5	5	5	5	5
	Vial 24	12	12	12	12	12	12	12	11	10	8	5	5	5	5	5
	Vial 25	12	12	12	12	12	12	12	10	9	7	3	3	3	3	3
	Vial 26	12	12	12	12	12	12	12	12	9	5	5	5	5	5	5
	TOTAL FLIES	152	152	152	152	152	152	150	133	106	82	54	54	53	53	53
	% SURVIVAL	100	100	100	100	100	100	98.6842	87.5	69.7368	53.9474	35.5263	35.5263	34.8684	34.8684	34.8684
Continuously fed	Vial 2	11	10	10	10	10	10	10	10	10	10	10	10	10	10	10
	Vial 4	12	12	12	12	12	12	12	12	12	12	12	12	12	12	12
	Vial 5	11	11	11	11	11	11	11	11	11	11	11	11	11	11	11
	Vial 6	11	11	11	11	11	11	11	11	11	11	11	11	11	11	11
	Vial 7	11	11	11	11	11	11	11	11	11	11	11	11	11	11	11
	Vial 8	12	12	12	12	12	12	12	12	12	12	12	12	12	12	12
	TOTAL FLIES	68	67	67	67	67	67	67	67	67	67	67	67	67	67	67
	% SURVIVAL	100	98.5294	98.5294	98.5294	98.5294	98.5294	98.5294	98.5294	98.5294	98.5294	98.5294	98.5294	98.5294	98.5294	98.5294
vinc102.1
Fed-starved-refed	Vial 10	12	12	12	12	12	12	12	12	12	11	9	9	9	9	9
	Vial 11	12	12	12	12	12	12	12	11	10	9	6	6	6	6	6
	Vial 12	12	12	12	12	12	12	12	12	10	9	8	8	8	8	8
	Vial 13	10	9	9	9	9	9	9	9	6	5	5	5	5	5	5
	Vial 16	12	12	12	12	12	12	11	11	11	9	7	7	7	7	7
	Vial 17	12	12	12	12	12	12	11	9	7	7	6	6	6	6	6
	Vial 18	12	12	12	12	12	12	12	12	11	10	7	7	7	7	7
	Vial 19	12	12	12	12	12	12	12	12	11	11	8	8	8	8	8
	TOTAL FLIES	94	93	93	93	93	93	91	88	78	71	56	56	56	56	56
	% SURVIVAL	100	98.9362	98.9362	98.9362	98.9362	98.9362	96.8085	93.617	82.9787	75.5319	59.5745	59.5745	59.5745	59.5745	59.5745
Continuously fed	Vial 3	12	12	11	11	11	11	11	11	11	11	11	11	11	11	11
	Vial 5	12	12	12	12	12	12	12	12	12	12	12	12	12	12	12
	Vial 6	12	12	12	12	12	12	12	12	12	11	11	11	11	11	11
	Vial 7	12	12	12	12	12	12	12	12	12	12	12	12	12	12	12
	Vial 8	12	12	12	12	12	12	12	12	12	12	12	12	12	12	12
	TOTAL FLIES	60	60	59	59	59	59	59	59	59	58	58	58	58	58	58
	% SURVIVAL	100	100	98.3333	98.3333	98.3333	98.3333	98.3333	98.3333	98.3333	96.6667	96.6667	96.6667	96.6667	96.6667	96.6667

## Sheet: Log rank test
CONTINUOUSLY FED	CONTROL yw				vinc102.1
Day	Flies alive	Deaths	Expected deaths (no. flies x risk)		Flies alive	Deaths	Expected deaths (no. flies x risk)		Total flies alive	Total deaths	Risk of death
4	68	1	0.53125		60	0	0.46875		128	1	0.0078125
5	67	0	0.527559		60	1	0.472441		127	1	0.00787402
6	67	0	0		59	0	0		126	0	0
7	67	0	0		59	0	0		126	0	0
8	67	0	0		59	0	0		126	0	0
9	67	0	0		59	0	0		126	0	0
10	67	0	0		59	0	0		126	0	0
11	67	0	0		59	0	0		126	0	0
12	67	0	0.531746		59	1	0.468254		126	1	0.00793651
13	67	0	0		58	0	0		125	0	0
14	67	0	0		58	0	0		125	0	0
15	67	0	0		58	0	0		125	0	0
16	67	0	0		58	0	0		125	0	0
17	67	0	0		58	0	0		125	0	0
18	67	0	0		58	0	0		125	0	0
	TOTAL	0	1.59056			2	1.40944
	(O-E)2/E		1.59056				0.247442
	Degrees of freedom (number of groups minus 1)		1
	χ2		1.838
	0.05 = 3.94		No significant difference
FED-STARVED-FED	CONTROL yw				vinc102.1
	Flies alive	Deaths	Expected deaths (no. flies x risk)		Flies alive	Deaths	Expected deaths (no. flies x risk)		Total flies alive	Total deaths	Risk of death
4	152	0	0.617886		94	1	0.382114		246	1	0.00406504
5	152	0	0		93	0	0		245	0	0
6	152	0	0		93	0	0		245	0	0
7	152	0	0		93	0	0		245	0	0
8	152	0	0		93	0	0		245	0	0
9	152	2	2.48163		93	2	1.51837		245	4	0.0163265
10	150	17	12.4481		91	3	7.55187		241	20	0.0829876
11	133	27	22.267		88	10	14.733		221	37	0.167421
12	106	24	17.8587		78	7	13.1413		184	31	0.168478
13	82	28	23.0458		71	15	19.9542		153	43	0.281046
14	54	0	0		56	0	0		110	0	0
15	54	1	0.490909		56	0	0.509091		110	1	0.00909091
16	53	0	0		56	0	0		109	0	0
17	53	0	0		56	0	0		109	0	0
18	53	0	0		56	0	0		109	0	0
	TOTAL	99	79.21			37	57.79
	(O-E)2/E		4.94439				7.47923
	Degrees of freedom (number of groups minus 1)		1
	χ2		12.4236
	0.05 = 3.94		Significant difference ***
