# Supplementary material for: Vinculin recruitment to α-catenin halts the differentiation and maturation of enterocyte progenitors to maintain homeostasis of the Drosophila intestine
Source: eLife. 2022 Oct 21;11:e72836. doi: 10.7554/eLife.72836 (PMC9586559; doi:10.7554/eLife.72836)
Supplement: Figure 8—source data 1. [file elife-72836-fig8-data1.xlsx]

## Sheet: Survival_raw numbers
		Day 7	Day 8	Day 9	Day 10	Day 11	Day 12	Day 13	Day 14	Day 15	Day 16	Day 17	Day 18	Day 19	Day 20	Day 21
CONTROL yw esgGal4ts		(water/fed)	(water/fed)	(water/fed)	(water/fed)	(water/fed)	(water/fed)	flip onto normal food	normal food	normal food	normal food	normal food	normal food	normal food	normal food	normal food
Starvation - bung changed once daily	Vial 1	12	12	12	11	9	1	0	0	0	0	0	0	0	0	0
	Vial 2	12	11	9	9	5	2	0	0	0	0	0	0	0	0	0
	Vial 3	12	12	12	11	6	1	1	1	1	1	1	1	1	1	1
	Vial 4	12	10	5	4	0	0	0	0	0	0	0	0	0	0	0
	Vial 5	12	12	6	6	4	1	0	0	0	0	0	0	0	0	0
	Vial 6	12	12	12	11	7	3	0	0	0	0	0	0	0	0	0
	Vial 7	12	12	12	12	10	7	2	2	2	2	2	2	2	2	2
	Vial 8	12	10	7	7	4	1	0	0	0	0	0	0	0	0	0
	Vial 9	12	12	12	12	11	4	1	1	1	1	1	1	1	1	1
	Vial 10	12	12	12	9	1	1	0	0	0	0	0	0	0	0	0
	Vial 11	12	12	10	10	9	1	1	1	1	1	1	0	0	0	0
	Vial 12	12	12	12	12	7	3	0	0	0	0	0	0	0	0	0
	Vial 13	12	11	9	7	4	0	0	0	0	0	0	0	0	0	0
	Vial 14	12	11	10	9	4	1	0	0	0	0	0	0	0	0	0
	Vial 15	12	12	10	9	9	2	0	0	0	0	0	0	0	0	0
	Vial 16	12	11	9	9	5	4	4	4	4	4	4	4	4	4	4
	Vial 17	12	12	12	11	9	7	1	1	1	1	1	1	1	1	1
	Vial 18	12	12	11	3	1	0	0	0	0	0	0	0	0	0	0
	Vial 19	12	12	12	7	2	2	0	0	0	0	0	0	0	0	0
	Vial 20	12	11	9	8	6	1	0	0	0	0	0	0	0	0	0
	Vial 21	12	12	12	10	8	5	1	1	1	1	1	1	1	1	1
	Vial 22	12	12	10	5	1	0	0	0	0	0	0	0	0	0	0
	Vial 23	12	12	12	12	11	6	0	0	0	0	0	0	0	0	0
	Vial 24	12	12	11	11	6	0	0	0	0	0	0	0	0	0	0
Continuously fed	Vial 25	12	11	10	10	10	10	10	10	10	10	10	10	10	10	10
	Vial 26	12	12	11	11	11	11	11	11	11	11	11	11	11	11	11
	Vial 27	12	12	12	12	12	12	12	12	12	12	12	12	12	12	12
	Vial 28	12	12	12	12	12	12	12	12	12	12	12	12	12	12	12
	Vial 29	12	12	12	12	12	12	12	12	12	12	12	12	12	12	12
	Vial 30	12	12	10	10	10	10	9	9	9	9	9	9	9	9	9
	Vial 31	12	12	12	12	11	11	11	11	11	11	11	11	11	11	11
	Vial 32	12	12	12	10	10	9	9	9	9	9	9	9	9	9	9
	Vial 33	12	12	11	11	11	11	11	11	11	11	11	11	11	11	11
	Vial 34	12	12	11	11	11	11	11	11	11	11	11	11	11	11	11
	Vial 35	12	12	12	12	12	12	12	12	11	11	11	11	11	11	11
	Vial 36	12	12	12	12	11	11	11	11	9	9	9	8	8	8	8
VINC esgGal4ts vincRNAi #25965		(water/fed)	(water/fed)	(water/fed)	(water/fed)	(water/fed)	(water/fed)	flip onto normal food	normal food	normal food	normal food	normal food	normal food	normal food	normal food	normal food
Starvation - bung changed once daily	Vial 1	12	12	11	10	9	6	2	2	2	2	2	2	2	2	2
	Vial 2	12	11	11	11	10	5	0	0	0	0	0	0	0	0	0
	Vial 3	12	12	12	12	12	6	0	0	0	0	0	0	0	0	0
	Vial 4	12	12	12	11	7	5	1	1	1	1	1	1	1	1	1
	Vial 5	12	12	12	12	12	6	3	3	3	3	3	3	3	3	3
	Vial 6	12	12	12	10	8	7	3	3	3	3	3	3	3	3	3
	Vial 7	12	12	12	12	11	4	2	2	2	1	1	1	1	1	1
	Vial 8	12	12	12	12	11	8	4	4	4	4	4	4	4	4	4
	Vial 9	12	11	8	7	4	0	0	0	0	0	0	0	0	0	0
	Vial 10	12	12	12	12	11	8	2	2	2	2	2	2	2	2	2
	Vial 11	12	12	10	10	9	6	2	2	2	2	2	2	2	2	2
	Vial 12	12	12	11	11	5	3	0	0	0	0	0	0	0	0	0
	Vial 13	12	12	10	10	10	4	2	2	2	2	2	2	2	2	2
	Vial 14	12	12	11	11	10	5	1	1	1	1	1	1	1	1	1
	Vial 15	12	10	6	6	2	0	0	0	0	0	0	0	0	0	0
	Vial 16	12	12	12	10	6	3	0	0	0	0	0	0	0	0	0
	Vial 17	12	12	10	10	9	5	1	1	1	1	1	1	1	1	1
	Vial 18	12	12	12	10	3	1	1	1	1	1	1	1	1	1	1
	Vial 19	12	12	11	11	10	7	5	5	5	5	5	4	4	4	4
	Vial 20	12	12	10	10	9	4	0	0	0	0	0	0	0	0	0
	Vial 21	12	11	9	8	8	4	2	2	2	2	2	2	2	2	2
	Vial 22	12	11	10	8	6	4	1	1	1	1	1	1	1	1	1
	Vial 23	12	12	12	11	3	2	1	1	1	1	1	1	1	1	1
	Vial 24	12	12	12	11	7	0	0	0	0	0	0	0	0	0	0
Continuously fed	Vial 25	12	12	12	12	12	12	12	12	12	12	12	12	12	12	12
	Vial 26	12	12	12	12	12	12	11	11	11	11	10	10	10	10	10
	Vial 27	12	12	12	12	12	10	10	10	9	9	9	9	9	9	8
	Vial 28	12	12	12	12	12	12	12	12	12	11	11	11	11	11	11
	Vial 29	12	12	12	12	12	12	12	12	12	12	12	11	11	11	11
	Vial 30	12	12	12	12	12	12	12	12	12	12	12	12	12	12	12
	Vial 31	12	12	12	12	12	12	12	12	12	12	12	12	12	12	12
	Vial 32	12	12	12	12	12	12	12	12	12	12	12	12	12	12	12
	Vial 33	12	12	12	12	12	12	12	12	12	12	12	12	12	12	12
	Vial 34	12	12	11	10	10	9	9	9	9	9	9	9	8	8	8
	Vial 35	12	11	10	10	10	9	9	8	6	6	6	6	6	6	6
	Vial 36	12	12	12	12	12	12	12	12	12	11	11	11	11	11	11

## Sheet: Survival_%
		Day 7	Day 8	Day 9	Day 10	Day 11	Day 12	Day 13	Day 14	Day 15	Day 16	Day 17	Day 18	Day 19	Day 20	Day 21
CONTROL yw esgGal4ts		(water/fed)	(water/fed)	(water/fed)	(water/fed)	(water/fed)	(water/fed)	flip onto normal food	normal food	normal food	normal food	normal food	normal food	normal food	normal food	normal food
Starvation - bung changed once daily	Vial 1	12	12	12	11	9	1	0	0	0	0	0	0	0	0	0
	Vial 2	12	11	9	9	5	2	0	0	0	0	0	0	0	0	0
	Vial 3	12	12	12	11	6	1	1	1	1	1	1	1	1	1	1
	Vial 4	12	10	5	4	0	0	0	0	0	0	0	0	0	0	0
	Vial 5	12	12	6	6	4	1	0	0	0	0	0	0	0	0	0
	Vial 6	12	12	12	11	7	3	0	0	0	0	0	0	0	0	0
	Vial 7	12	12	12	12	10	7	2	2	2	2	2	2	2	2	2
	Vial 8	12	10	7	7	4	1	0	0	0	0	0	0	0	0	0
	Vial 9	12	12	12	12	11	4	1	1	1	1	1	1	1	1	1
	Vial 10	12	12	12	9	1	1	0	0	0	0	0	0	0	0	0
	Vial 11	12	12	10	10	9	1	1	1	1	1	1	0	0	0	0
	Vial 12	12	12	12	12	7	3	0	0	0	0	0	0	0	0	0
	Vial 13	12	11	9	7	4	0	0	0	0	0	0	0	0	0	0
	Vial 14	12	11	10	9	4	1	0	0	0	0	0	0	0	0	0
	Vial 15	12	12	10	9	9	2	0	0	0	0	0	0	0	0	0
	Vial 16	12	11	9	9	5	4	4	4	4	4	4	4	4	4	4
	Vial 17	12	12	12	11	9	7	1	1	1	1	1	1	1	1	1
	Vial 18	12	12	11	3	1	0	0	0	0	0	0	0	0	0	0
	Vial 19	12	12	12	7	2	2	0	0	0	0	0	0	0	0	0
	Vial 20	12	11	9	8	6	1	0	0	0	0	0	0	0	0	0
	Vial 21	12	12	12	10	8	5	1	1	1	1	1	1	1	1	1
	Vial 22	12	12	10	5	1	0	0	0	0	0	0	0	0	0	0
	Vial 23	12	12	12	12	11	6	0	0	0	0	0	0	0	0	0
	Vial 24	12	12	11	11	6	0	0	0	0	0	0	0	0	0	0
	TOTAL FLIES	288	279	248	215	139	53	11	11	11	11	11	10	10	10	10
	% SURVIVAL	100	96.875	86.1111	74.6528	48.2639	18.4028	3.81944	3.81944	3.81944	3.81944	3.81944	3.47222	3.47222	3.47222	3.47222
Continuously fed	Vial 25	12	11	10	10	10	10	10	10	10	10	10	10	10	10	10
	Vial 26	12	12	11	11	11	11	11	11	11	11	11	11	11	11	11
	Vial 27	12	12	12	12	12	12	12	12	12	12	12	12	12	12	12
	Vial 28	12	12	12	12	12	12	12	12	12	12	12	12	12	12	12
	Vial 29	12	12	12	12	12	12	12	12	12	12	12	12	12	12	12
	Vial 30	12	12	10	10	10	10	9	9	9	9	9	9	9	9	9
	Vial 31	12	12	12	12	11	11	11	11	11	11	11	11	11	11	11
	Vial 32	12	12	12	10	10	9	9	9	9	9	9	9	9	9	9
	Vial 33	12	12	11	11	11	11	11	11	11	11	11	11	11	11	11
	Vial 34	12	12	11	11	11	11	11	11	11	11	11	11	11	11	11
	Vial 35	12	12	12	12	12	12	12	12	11	11	11	11	11	11	11
	Vial 36	12	12	12	12	11	11	11	11	9	9	9	8	8	8	8
	TOTAL FLIES	144	143	137	135	133	132	131	131	128	128	128	127	127	127	127
	% SURVIVAL	100	99.3056	95.1389	93.75	92.3611	91.6667	90.9722	90.9722	88.8889	88.8889	88.8889	88.1944	88.1944	88.1944	88.1944
VINC esgGal4ts vincRNAi #25965		(water/fed)	(water/fed)	(water/fed)	(water/fed)	(water/fed)	(water/fed)	flip onto normal food	normal food	normal food	normal food	normal food	normal food	normal food	normal food	normal food
Starvation - bung changed once daily	Vial 1	12	12	11	10	9	6	2	2	2	2	2	2	2	2	2
	Vial 2	12	11	11	11	10	5	0	0	0	0	0	0	0	0	0
	Vial 3	12	12	12	12	12	6	0	0	0	0	0	0	0	0	0
	Vial 4	12	12	12	11	7	5	1	1	1	1	1	1	1	1	1
	Vial 5	12	12	12	12	12	6	3	3	3	3	3	3	3	3	3
	Vial 6	12	12	12	10	8	7	3	3	3	3	3	3	3	3	3
	Vial 7	12	12	12	12	11	4	2	2	2	1	1	1	1	1	1
	Vial 8	12	12	12	12	11	8	4	4	4	4	4	4	4	4	4
	Vial 9	12	11	8	7	4	0	0	0	0	0	0	0	0	0	0
	Vial 10	12	12	12	12	11	8	2	2	2	2	2	2	2	2	2
	Vial 11	12	12	10	10	9	6	2	2	2	2	2	2	2	2	2
	Vial 12	12	12	11	11	5	3	0	0	0	0	0	0	0	0	0
	Vial 13	12	12	10	10	10	4	2	2	2	2	2	2	2	2	2
	Vial 14	12	12	11	11	10	5	1	1	1	1	1	1	1	1	1
	Vial 15	12	10	6	6	2	0	0	0	0	0	0	0	0	0	0
	Vial 16	12	12	12	10	6	3	0	0	0	0	0	0	0	0	0
	Vial 17	12	12	10	10	9	5	1	1	1	1	1	1	1	1	1
	Vial 18	12	12	12	10	3	1	1	1	1	1	1	1	1	1	1
	Vial 19	12	12	11	11	10	7	5	5	5	5	5	4	4	4	4
	Vial 20	12	12	10	10	9	4	0	0	0	0	0	0	0	0	0
	Vial 21	12	11	9	8	8	4	2	2	2	2	2	2	2	2	2
	Vial 22	12	11	10	8	6	4	1	1	1	1	1	1	1	1	1
	Vial 23	12	12	12	11	3	2	1	1	1	1	1	1	1	1	1
	Vial 24	12	12	12	11	7	0	0	0	0	0	0	0	0	0	0
	TOTAL FLIES	288	282	260	246	192	103	33	33	33	32	32	31	31	31	31
	% SURVIVAL	100	97.9167	90.2778	85.4167	66.6667	35.7639	11.4583	11.4583	11.4583	11.1111	11.1111	10.7639	10.7639	10.7639	10.7639
Continuously fed	Vial 25	12	12	12	12	12	12	12	12	12	12	12	12	12	12	12
	Vial 26	12	12	12	12	12	12	11	11	11	11	10	10	10	10	10
	Vial 27	12	12	12	12	12	10	10	10	9	9	9	9	9	9	8
	Vial 28	12	12	12	12	12	12	12	12	12	11	11	11	11	11	11
	Vial 29	12	12	12	12	12	12	12	12	12	12	12	11	11	11	11
	Vial 30	12	12	12	12	12	12	12	12	12	12	12	12	12	12	12
	Vial 31	12	12	12	12	12	12	12	12	12	12	12	12	12	12	12
	Vial 32	12	12	12	12	12	12	12	12	12	12	12	12	12	12	12
	Vial 33	12	12	12	12	12	12	12	12	12	12	12	12	12	12	12
	Vial 34	12	12	11	10	10	9	9	9	9	9	9	9	8	8	8
	Vial 35	12	11	10	10	10	9	9	8	6	6	6	6	6	6	6
	Vial 36	12	12	12	12	12	12	12	12	12	11	11	11	11	11	11
	TOTAL FLIES	144	143	141	140	140	136	135	134	131	129	128	127	126	126	125
	% SURVIVAL	100	99.3056	97.9167	97.2222	97.2222	94.4444	93.75	93.0556	90.9722	89.5833	88.8889	88.1944	87.5	87.5	86.8056

## Sheet: Log rank test
CONTINUOUSLY FED	CONTROL yw esgGal4ts				VINC esgGal4ts vincRNAi #25965
Day of adult life	Flies alive	Deaths	Expected deaths (no. flies x risk)		Flies alive	Deaths	Expected deaths (no. flies x risk)		Total flies alive	Total deaths	Risk of death
7	144	1	1		144	1	1		288	2	0.00694444
8	143	6	4		143	2	4		286	8	0.027972
9	137	2	1.47842		141	1	1.52158		278	3	0.0107914
10	135	2	0.981818		140	0	1.01818		275	2	0.00727273
11	133	1	2.4359		140	4	2.5641		273	5	0.018315
12	132	1	0.985075		136	1	1.01493		268	2	0.00746269
13	131	0	0.492481		135	1	0.507519		266	1	0.0037594
14	131	3	2.96604		134	3	3.03396		265	6	0.0226415
15	128	0	0.988417		131	2	1.01158		259	2	0.00772201
16	128	0	0.498054		129	1	0.501946		257	1	0.00389105
17	128	1	1		128	1	1		256	2	0.0078125
18	127	0	0.5		127	1	0.5		254	1	0.00393701
19	127	0	0		126	0	0		253	0	0
20	127	0	0.501976		126	1	0.498024		253	1	0.00395257
21	127	0	0		125	0	0		252	0	0
TOTAL		17	17.8282			19	18.1718
(O-E)2/E			0.0384713				0.0377437
Degrees of freedom (number of groups minus 1)			1
χ2			0.076215
0.05 = 3.94			Not significant
FED-STARVED-FED	CONTROL yw esgGal4ts				VINC esgGal4ts vincRNAi #25965
Day of adult life	Flies alive	Deaths	Expected deaths (no. flies x risk)		Flies alive	Deaths	Expected deaths (no. flies x risk)		Total flies alive	Total deaths	Risk of death
7	288	9	7.5		288	6	7.5		576	15	0.0260417
8	279	31	26.3583		282	22	26.6417		561	53	0.0944742
9	248	33	22.9449		260	14	24.0551		508	47	0.0925197
10	215	76	60.6291		246	54	69.3709		461	130	0.281996
11	139	86	73.4894		192	89	101.511		331	175	0.528701
12	53	42	38.0513		103	70	73.9487		156	112	0.717949
13	11	0	0		33	0	0		44	0	0
14	11	0	0		33	0	0		44	0	0
15	11	0	0.25		33	1	0.75		44	1	0.0227273
16	11	0	0		32	0	0		43	0	0
17	11	1	0.511628		32	1	1.48837		43	2	0.0465116
18	10	0	0		31	0	0		41	0	0
19	10	0	0		31	0	0		41	0	0
20	10	0	0		31	0	0		41	0	0
21	10	0	0		31	0	0		41	0	0
TOTAL		278	229.735			257	305.265
(O-E)2/E			10.1402				7.63123
Degrees of freedom (number of groups minus 1)			1
χ2			17.7714
0.05 = 3.94			****
