# Supplementary material for: Vinculin recruitment to α-catenin halts the differentiation and maturation of enterocyte progenitors to maintain homeostasis of the Drosophila intestine
Source: eLife. 2022 Oct 21;11:e72836. doi: 10.7554/eLife.72836 (PMC9586559; doi:10.7554/eLife.72836)
Supplement: Supplementary file 1. [file elife-72836-supp1.xlsx]

## Sheet: Sheet1
Figure and panels	reference in figure	Genotype
Figure 1 B-F	Ctrl:	y,w / w; esgGal4, tubGal80[ts] UAS GFP / + ; + / +
Figure 1 B-F	mysRNAi #27735:	y,w / y,v; esgGal4, tubGal80[ts] UAS GFP / + ; P{y[+t7.7] v[+t1.8]=TRiP.JF02819}attP2 / +
Figure 1 B-F	talinRNAi #28950:	y,w / y,v; esgGal4, tubGal80[ts] UAS GFP / + ; P{y[+t7.7] v[+t1.8]=TRiP.HM05161}attP2 / +
Figure 1 B-F	talinRNAi #33913:	y,w / y,sc,v,sev; esgGal4, tubGal80[ts] UAS GFP / + ; P{y[+t7.7] v[+t1.8]=TRiP.HMS00856}attP2 / +
Figure 1 B-F	vincRNAi #25965:	y,w / y,v; esgGal4, tubGal80[ts] UAS GFP / + ; P{y[+t7.7] v[+t1.8]=TRiP.JF01985}attP2 / +
Figure 1 B-F	vincRNAi #41959:	y,w / y,sc,v,sev; esgGal4, tubGal80[ts] UAS GFP / + ; P{y[+t7.7] v[+t1.8]=TRiP.HMS02356}attP2 / +
Figure 2 A-B	yw:	yw / yw; + / + ; + / +
Figure 2 A-B	vinc102.1:	vinculin[102.1] / vinculin[102.1]; + / + ; + / +
Figure 2 D-G	yw esgts F/O:	y,w / Y; esg-Gal4, tubGal80[ts], UAS-GFP / + ; UAS-flp, act >CD2>Gal4 / +
Figure 2 D-G	vinc102.1 esgts F/O:	vinculin[102.1] / Y; esg-Gal4, tubGal80[ts], UAS-GFP / + ; UAS-flp, act >CD2>Gal4 / +
Figure 2 D-G	vinc102.1, vincRFP esgts F/O:	vinculin[102.1] / Y; esg-Gal4, tubGal80[ts], UAS-GFP / vincRFP; UAS-flp, act >CD2>Gal4 / +
Figure 3 A-C	Ctrl:	w / yw ; esg-Gal4 UAS-YFP / + ; Su(H) GBE-Gal80, tubGal80ts / +
Figure 3 A-C	vincRNAi #25965:	y,v / w ; esg-Gal4 UAS-YFP / + ; P{y[+t7.7] v[+t1.8]=TRiP.JF01985}attP2 /Su(H) GBE-Gal80, tubGal80ts
Figure 3 A-C	mysRNAi #27735:	y,v / w ; esg-Gal4 UAS-YFP / + ; P{y[+t7.7] v[+t1.8]=TRiP.JF02819}attP2 / Su(H) GBE-Gal80, tubGal80ts
Figure 3 A-C	talinRNAi #28950:	y,v / w ; esg-Gal4 UAS-YFP / + ; Su(H) GBE-Gal80, tubGal80ts / P{y[+t7.7] v[+t1.8]=TRiP.HM05161}attP2
Figure 4 A-D	yw, NRE-lacZ:	yw / Y ; NRE-lacZ [3-45] / + ; + / +
Figure 4 A-D	vinc102.1, NRE-lacZ:	vinculin[102.1] / Y ; NRE-lacZ [3-45] / + ; + / +
Figure 4 E-G	Ctrl:	hsflp, FRT19A, tubGal80 / FRT19A ; UAS-mCD8-GFP / + ; tub-Gal4 / +
Figure 4 E-G	vinc102.1:	hsflp, FRT19A, tubGal80 / FRT19A vinculin[102.1] ; UAS-mCD8-GFP / + ; tub-Gal4 / +
Figure 4 E-G	vincRNAi #25965:	hsflp, FRT19A, tubGal80 / FRT19A ; UAS-mCD8-GFP / + ; tub-Gal4 / P{y[+t7.7] v[+t1.8]=TRiP.JF01985}attP2
Figure 5 A-C	Ctrl:	yw / w; esg-Gal4, UAS-mCD8-GFP / + ; tubGal80[ts], UAS H2B RFP / +
Figure 5 A-C	vincRNAi #25965:	yv / + ; esg-Gal4, UAS-mCD8-GFP / + ; tubGal80[ts], UAS H2B RFP / P{y[+t7.7] v[+t1.8]=TRiP.JF01985}attP2
Figure 5 D-F	Ctrl:	yw / w; UAS-CD8-GFP, tubGal80[ts] / + ; Klu-Gal4, UAS-H2B-RFP / +
Figure 5 D-F	vincRNAi #25965:	yv / w ; UAS-CD8-GFP, tubGal80[ts] / + ; Klu-Gal4, UAS-H2B-RFP / P{y[+t7.7] v[+t1.8]=TRiP.JF01985}attP2
Figure 6 B-C	Ctrl:	y,w / w; esgGal4, tubGal80[ts] UAS GFP / + ; + / +
Figure 6 B-C	αcatRNAi #33430:	y,sc,v,sev / w ; esgGal4, tubGal80[ts] UAS GFP / + ; P{y[+t7.7] v[+t1.8]=TRiP.HMS00317}attP2 / +
Figure 6 B-C	αcatRNAi #38987:	y,v / w ; esgGal4, tubGal80[ts] UAS GFP / P{y[+ t7.7] v[+ t1.8]=TRiP.HMS01903}attP40; + / +
Figure 6 B-C	vincRNAi #25965:	y,w / y,v ; esgGal4, tubGal80[ts] UAS GFP / + ; P{y[+t7.7] v[+t1.8]=TRiP.JF01985}attP2 / +
Figure 6 E-G	Ctrl:	yw / w ; esg-Gal4, UAS-mCD8-GFP / + ; tubGal80[ts], UAS H2B RFP / +
Figure 6 E-G	αcatFL + αcatRNAi #33430:	w / + ; esg-Gal4, UAS-mCD8-GFP / UAST-αCatFLmut-V5[attP40]; tubGal80[ts], UAS H2B RFP / P{y[+t7.7] v[+t1.8]=TRiP.HMS00317}attP2
Figure 6 E-G	αcatΔM1a + αcatRNAi #33430:	w / + ; esg-Gal4, UAS-mCD8-GFP / UAST-αCatΔ265-397mut-V5[attP40]; tubGal80[ts], UAS H2B RFP / P{y[+t7.7] v[+t1.8]=TRiP.HMS00317}attP2
Figure 6 E-G	αcatΔM1b + αcatRNAi #33430:	w / + ; esg-Gal4, UAS-mCD8-GFP / UAST-αCatΔ273-398mut-V5[attP40]; tubGal80[ts], UAS H2B RFP / P{y[+t7.7] v[+t1.8]=TRiP.HMS00317}attP2
Figure 6 E-G	αcatΔM2 + αcatRNAi #33430:	w / + ; esg-Gal4, UAS-mCD8-GFP / UAST-αCatΔ397-509mut-V5[attP40]; tubGal80[ts], UAS H2B RFP / P{y[+t7.7] v[+t1.8]=TRiP.HMS00317}attP2
Figure 7 A-B	Ctrl:	w / Y; esg-Gal4, UAS-mCD8-GFP / +; tubGal80[ts], UAS H2B RFP / +
Figure 7 A-B	sqhDD:	w / Y; esg-Gal4, UAS-mCD8-GFP / UAS-sqh[DD]; tubGal80[ts], UAS H2B RFP / +
Figure 7 A-B	vinc102.1:	vinculin[102.1] / Y; esg-Gal4, UAS-mCD8-GFP / + ; tubGal80[ts], UAS H2B RFP / +
Figure 7 A-B	vinc102.1+sqhDD:	vinculin[102.1] / Y; esg-Gal4, UAS-mCD8-GFP / UAS-sqh[DD]; tubGal80[ts], UAS H2B RFP / +
Figure 7 C-D	Ctrl:	vinculin[102.1] / Y; vinc-GFP / + ; Klu-Gal4, UAS-H2B-RFP, tubGal80[ts] /+
Figure 7 C-D	sqhDD:	vinculin[102.1] / Y; vinc-GFP / UAS-sqh[DD]; Klu-Gal4, UAS-H2B-RFP, tubGal80[ts] / +
Figure 8 A-B	yw Ctrl:	y,w / w; esgGal4, tubGal80[ts] UAS GFP / + ; + / +
Figure 8 A-B	vincRNAi #25965:	y,w / y,v; esgGal4, tubGal80[ts] UAS GFP / +; P{y[+t7.7] v[+t1.8]=TRiP.JF01985}attP2 / +
Fig1-Sup 1 A-F	vinc-GFP:	+/+; vinc-GFP/vinc-GFP; +/+; +/+
Fig1-Sup 1 G	Ctrl:	y,w / w; esgGal4, tubGal80[ts] UAS GFP / + ; + / +
Fig1-Sup 1 G	vincRNAi #25965:	y,w / y,v; esgGal4, tubGal80[ts] UAS GFP / + ; P{y[+t7.7] v[+t1.8]=TRiP.JF01985}attP2 / +
Fig1-Sup 1 G	vincRNAi #41959:	y,w / y,sc,v,sev; esgGal4, tubGal80[ts] UAS GFP / + ; P{y[+t7.7] v[+t1.8]=TRiP.HMS02356}attP2 / +
Fig2-Sup1	yw:	yw / yw; + / + ; + / +
Fig2-Sup1	vinc102.1:	vinculin[102.1] / vinculin[102.1]; + / + ; + / +
Fig2-Sup2 B	vinc102.1 esgts F/O:	vinculin[102.1] / Y; esg-Gal4, tubGal80[ts], UAS-GFP / + ; UAS-flp, act >CD2>Gal4 / +
Fig4-Sup1	yw, 10XSTAT-GFP:	w / Y; 10XSTAT-GFP; + / +
Fig4-Sup1	vinc102.1, 10XSTAT-GFP:	vinculin[102.1] / Y; 10XSTAT-GFP; + / +
Fig4-Sup2 A	Ctrl:	hsflp, FRT19A, tubGal80 / FRT19 A; UAS-mCD8-GFP / + ; tub-Gal4 / +
Fig4-Sup2 A	vinc102.1:	hsflp, FRT19A, tubGal80 / FRT19 A vinculin[102.1]; UAS-mCD8-GFP / +; tub-Gal4 /+
Fig4-Sup2 A	vincRNAi #25965:	hsflp, FRT19A, tubGal80 /FRT19 A; UAS-mCD8-GFP / + ; tub-Gal4 /P{y[+t7.7] v[+t1.8]=TRiP.JF01985}attP2
Fig4-Sup2 B	Ctrl:	hsflp, FRT19A, tubGal80 /FRT19 A; UAS-mCD8-GFP / +; tub-Gal4 /+
Fig4-Sup2 B	vincRNAi #25965:	hsflp, FRT19A, tubGal80 / FRT19 A; UAS-mCD8-GFP / + ; tub-Gal4 /P{y[+t7.7] v[+t1.8]=TRiP.JF01985}attP2
Fig5-Sup1	Ctrl:	y,w / w; UAS-CD8-GFP, tubGal80[ts]; Klu-Gal4, UAS-H2B-RFP / +
Fig5-Sup1	vincRNAi #25965:	y,v / w; UAS-CD8-GFP, tubGal80[ts] / + ; Klu-Gal4, UAS-H2B-RFP / P{y[+t7.7] v[+t1.8]=TRiP.JF01985}attP2
Fig5-Sup2	Ctrl:	y,w / yw; MyoIA-Gal4 tub-Gal80[ts] / UAS-CD8-GFP; + / +
Fig5-Sup2	vincRNAi #25965:	y,w / yv; MyoIA-Gal4 tub-Gal80[ts] / UAS-CD8-GFP; P{y[+t7.7] v[+t1.8]=TRiP.JF01985}attP2 / +
Fig6-Sup1 A		hsflp, FRT19A, tubGal80 / FRT19 A; UAS-mCD8-GFP / + ; tub-Gal4 / P{y[+t7.7] v[+t1.8]=TRiP.JF01985}attP2
Fig6-Sup1 B-C	Ctrl:	vinculin[102.1] / Y; vinc-GFP / +; Klu-Gal4, UAS-H2B-RFP, tubGal80[ts] / +
Fig6-Sup1 B-C	αcatRNAi #33430:	vinculin[102.1] / Y; vinc-GFP / +; Klu-Gal4, UAS-H2B-RFP, tubGal80[ts] / P{y[+t7.7] v[+t1.8]=TRiP.HMS00317}attP2
Fig6-Sup2 A	Ctrl:	w / yw; esg-Gal4 UAS-YFP / + ; Su(H) GBE-Gal80, tubGal80ts / +
Fig6-Sup2 A	αcatFL + αcatRNAi #33430:	w / yw; esg-Gal4 UAS-YFP / UAST-αCatFLmut-V5[attP40]; Su(H) GBE-Gal80, tubGal80ts / P{y[+t7.7] v[+t1.8]=TRiP.HMS00317}attP2
Fig6-Sup2 A	αcatΔM1a + αcatRNAi #33430:	w / yw; esg-Gal4 UAS-YFP / UAST-αCatΔ265-397mut-V5[attP40]; Su(H) GBE-Gal80, tubGal80ts / P{y[+t7.7] v[+t1.8]=TRiP.HMS00317}attP2
Fig6-Sup2 B	Ctrl:	y,w / w; UAS-CD8-GFP, tubGal80[ts] / +; Klu-Gal4, UAS-H2B-RFP / +
Fig6-Sup2 B	αcatFL + αcatRNAi #33430:	w / +; UAS-CD8-GFP, tubGal80[ts] / UAST-αCatFLmut-V5[attP40]; Klu-Gal4, UAS-H2B-RFP / P{y[+t7.7] v[+t1.8]=TRiP.HMS00317}attP2
Fig6-Sup2 B	αcatΔM1a + αcatRNAi #33430:	w / +; UAS-CD8-GFP, tubGal80[ts] / UAST-αCatΔ265-397mut-V5[attP40]; Klu-Gal4, UAS-H2B-RFP / P{y[+t7.7] v[+t1.8]=TRiP.HMS00317}attP2
Fig6-Sup3	Ctrl:	y,w / w; UAS-CD8-GFP, tubGal80[ts] / +; Klu-Gal4, UAS-H2B-RFP / +
Fig6-Sup3	αcatRNAi #33430:	w / +; UAS-CD8-GFP, tubGal80[ts] / +; Klu-Gal4, UAS-H2B-RFP / P{y[+t7.7] v[+t1.8]=TRiP.HMS00317}attP2
Fig6-Sup3	shgRNAi #32904:	w / +; UAS-CD8-GFP, tubGal80[ts] /+; Klu-Gal4, UAS-H2B-RFP / P{y[+t7.7] v[+t1.8]=TRiP.HMS00693}attP2
Fig6-Sup4	Ctrl:	y,w / w; UAS-CD8-GFP, tubGal80[ts] / +; Klu-Gal4, UAS-H2B-RFP / +
Fig6-Sup4	mysRNAi #27735:	y,w / y,v; UAS-CD8-GFP, tubGal80[ts] / +; P{y[+t7.7] v[+t1.8]=TRiP.JF02819}attP2 /Klu-Gal4, UAS-H2B-RFP
Fig6-Sup4	talinRNAi #28950:	y,w / y,v; UAS-CD8-GFP, tubGal80[ts] / +; P{y[+t7.7] v[+t1.8]=TRiP.HM05161}attP2 /Klu-Gal4, UAS-H2B-RFP
Fig7-Sup1	Ctrl:	yw / w; esg-Gal4, UAS-mCD8-GFP / +; tubGal80[ts], UAS H2B RFP / +
Fig7-Sup1	sqhDD:	w / +; esg-Gal4, UAS-mCD8-GFP / UAS-sqhDD; tubGal80[ts], UAS H2B RFP / +
Fig7-Sup1	sqh-RNAi:	w / +; esg-Gal4, UAS-mCD8-GFP / UAS-sqhRNAi; tubGal80[ts], UAS H2B RFP / +
Fig7-Sup1	zipper-RNAi:	w / hs-flp; esg-Gal4, UAS-mCD8-GFP /UAS-zipperRNAi; tubGal80[ts], UAS H2B RFP / +
Fig7-Sup2	yw esgts F/O:	yw/ Y; esg-Gal4, tubGal80[ts], UAS-GFP / +; UAS-flp, act >CD2>Gal4 /+
Fig7-Sup2	yw esgts F/O+UASVincCO-RFP:	yw/ Y; esg-Gal4, tubGal80[ts], UAS-GFP / UAS-VincCO-RFP; UAS-flp, act >CD2>Gal4 /+
Fig7-Sup2	vinc102.1 esgts F/O:	vinculin[102.1] / Y; esg-Gal4, tubGal80[ts], UAS-GFP / +; UAS-flp, act >CD2>Gal4 /+
Fig7-Sup2	vinc102.1 esgts F/O+UASVincCO-RFP:	vinculin[102.1] / Y; esg-Gal4, tubGal80[ts], UAS-GFP / UAS-VincCO-RFP; UAS-flp, act >CD2>Gal4 / +
Fig8-Sup1	yw:	yw / yw; + / + ; + / +
Fig8-Sup1	vinc102.1:	vinculin[102.1] / vinculin[102.1]; + / + ; + / +
